# Supplementary material for: Teaching Anxiety, Stress and Resilience during the COVID-19 Pandemic: Evaluating the Vulnerability of Academic Professionals in Mexico through the Adapted COVID-19 Stress Scales
Source: Preprints.org preprint supplement (doi:10.20944/preprints202101.0406.v1), 2021-01-20
Supplement: Supplementary file 1 [file supplementary]

## Sheet: Supplemental Table 2
AGE * DANGER
Cross Tables
			DANGER				Total
			ABSCENT	MILD	Teaching Teaching modeRATE	SEVERE
AGE	18 - 30	Counts	7	16	22	8	53
		% of AGE	0.132075	0.301887	0.415094	0.150943	1
	31 - 40	Counts	6	23	27	17	73
		% of AGE	0.0821918	0.315068	0.369863	0.232877	1
	41 - 50	Counts	3	16	22	4	45
		% of AGE	0.0666667	0.355556	0.488889	0.0888889	1
	51 - 60	Counts	5	9	16	6	36
		% of AGE	0.138889	0.25	0.444444	0.166667	1
	above 60	Counts	0	5	5	1	11
		% of AGE	0	0.454545	0.454545	0.0909091	1
Total		Counts	21	69	92	36	218
		% of AGE	0.0963303	0.316514	0.422018	0.165138	1
Pruebas de chi-cuadrado
	Value	df	Asymptotic significance (bilateral)
Pearson´s Chi-squared	9.489a	12	0.660681
Verisimilitude	10.5647	12	0.566544
Linear association	0.00176316	1	0.966507
# of valid cases	218
a. 6 cells (30.0%) with expected counts less than 5. The minimum count expected is1.06.
Symetric measures
		Value	asymptotic standard error	approx. Tb	approx. significance
Interval	Pearson´s R	-0.00285047	0.0661523	-0.0418934	.967c
Ordinal	Spearman correlation	-0.00259721	0.0672972	-0.0381712	.970c
# of valid cases		218
a. Null hypothesis is not asumed
b. Use of the asymptotic standard error that assumes the null hypothesis.
c. It is based on normal approximation.
AGE * XENOPHOBIA
Cross Tables
			XENOPHOBIA				Total
			ABSCENT	MILD	Teaching Teaching modeRATE	SEVERE
AGE	18 - 30	Counts	12	23	15	3	53
		% of AGE	0.226415	0.433962	0.283019	0.0566038	1
	31 - 40	Counts	17	30	22	4	73
		% of AGE	0.232877	0.410959	0.30137	0.0547945	1
	41 - 50	Counts	8	22	10	5	45
		% of AGE	0.177778	0.488889	0.222222	0.111111	1
	51 - 60	Counts	9	12	13	2	36
		% of AGE	0.25	0.333333	0.361111	0.0555556	1
	above 60	Counts	1	4	5	1	11
		% of AGE	0.0909091	0.363636	0.454545	0.0909091	1
Total		Counts	47	91	65	15	218
		% of AGE	0.215596	0.417431	0.298165	0.0688073	1
Pruebas de chi-cuadrado
	Value	df	Asymptotic significance (bilateral)
Pearson´s Chi-squared	6.656a	12	0.879505
Verisimilitude	6.6708	12	0.87858
Linear association	1.1043	1	0.293325
# of valid cases	218
a. 7 cells (35.0%) with expected counts less than 5. The minimum count expected is.76.
Symetric measures
		Value	asymptotic standard error	approx. Tb	approx. significance
Interval	Pearson´s R	0.0713367	0.0669385	1.05111	.294c
Ordinal	Spearman correlation	0.0645692	0.067654	0.950954	.343c
# of valid cases		218
a. Null hypothesis is not asumed
b. Use of the asymptotic standard error that assumes the null hypothesis.
c. It is based on normal approximation.
AGE * TRAUMATIC STRESS
Cross Tables
			TRAUMATIC STRESS				Total
			ABSCENT	MILD	Teaching Teaching modeRATE	SEVERE
AGE	18 - 30	Counts	37	12	2	2	53
		% of AGE	0.698113	0.226415	0.0377358	0.0377358	1
	31 - 40	Counts	43	17	9	4	73
		% of AGE	0.589041	0.232877	0.123288	0.0547945	1
	41 - 50	Counts	33	5	5	2	45
		% of AGE	0.733333	0.111111	0.111111	0.0444444	1
	51 - 60	Counts	23	11	1	1	36
		% of AGE	0.638889	0.305556	0.0277778	0.0277778	1
	above 60	Counts	6	4	1	0	11
		% of AGE	0.545455	0.363636	0.0909091	0	1
Total		Counts	142	49	18	9	218
		% of AGE	0.651376	0.224771	0.0825688	0.0412844	1
Pruebas de chi-cuadrado
	Value	df	Asymptotic significance (bilateral)
Pearson´s Chi-squared	11.354a	12	0.498863
Verisimilitude	12.6909	12	0.391901
Linear association	0.00351531	1	0.952721
# of valid cases	218
a. 10 cells (50.0%) with expected counts less than 5. The minimum count expected is.45.
Symetric measures
		Value	asymptotic standard error	approx. Tb	approx. significance
Interval	Pearson´s R	-0.00402487	0.0601254	-0.0591538	.953c
Ordinal	Spearman correlation	0.0134772	0.0648958	0.198092	.843c
# of valid cases		218
a. Null hypothesis is not asumed
b. Use of the asymptotic standard error that assumes the null hypothesis.
c. It is based on normal approximation.
AGE * COMPULSIVE CHECKING
Cross Tables
			COMPULSIVE CHECKING				Total
			ABSCENT	MILD	Teaching Teaching modeRATE	SEVERE
AGE	18 - 30	Counts	25	23	4	1	53
		% of AGE	0.471698	0.433962	0.0754717	0.0188679	1
	31 - 40	Counts	31	27	13	2	73
		% of AGE	0.424658	0.369863	0.178082	0.0273973	1
	41 - 50	Counts	15	17	9	4	45
		% of AGE	0.333333	0.377778	0.2	0.0888889	1
	51 - 60	Counts	16	13	4	3	36
		% of AGE	0.444444	0.361111	0.111111	0.0833333	1
	above 60	Counts	6	2	2	1	11
		% of AGE	0.545455	0.181818	0.181818	0.0909091	1
Total		Counts	93	82	32	11	218
		% of AGE	0.426606	0.376147	0.146789	0.0504587	1
Pruebas de chi-cuadrado
	Value	df	Asymptotic significance (bilateral)
Pearson´s Chi-squared	11.025a	12	0.526773
Verisimilitude	11.6504	12	0.474146
Linear association	1.8628	1	0.172302
# of valid cases	218
a. 8 cells (40.0%) with expected counts less than 5. The minimum count expected is.56.
Symetric measures
		Value	asymptotic standard error	approx. Tb	approx. significance
Interval	Pearson´s R	0.0926517	0.0679689	1.36758	.173c
Ordinal	Spearman correlation	0.0798981	0.0672474	1.17802	.240c
# of valid cases		218
a. Null hypothesis is not asumed
b. Use of the asymptotic standard error that assumes the null hypothesis.
c. It is based on normal approximation.
AGE * SOCIAL ECONOMICAL
Cross Tables
			SOCIAL ECONOMICAL				Total
			ABSCENT	MILD	Teaching Teaching modeRATE	SEVERE
AGE	18 - 30	Counts	16	23	13	1	53
		% of AGE	0.301887	0.433962	0.245283	0.0188679	1
	31 - 40	Counts	14	34	21	4	73
		% of AGE	0.191781	0.465753	0.287671	0.0547945	1
	41 - 50	Counts	7	26	8	4	45
		% of AGE	0.155556	0.577778	0.177778	0.0888889	1
	51 - 60	Counts	6	17	13	0	36
		% of AGE	0.166667	0.472222	0.361111	0	1
	above 60	Counts	2	4	4	1	11
		% of AGE	0.181818	0.363636	0.363636	0.0909091	1
Total		Counts	45	104	59	10	218
		% of AGE	0.206422	0.477064	0.270642	0.0458716	1
Pruebas de chi-cuadrado
	Value	df	Asymptotic significance (bilateral)
Pearson´s Chi-squared	12.769a	12	0.38602
Verisimilitude	13.9693	12	0.302673
Linear association	2.28833	1	0.13035
# of valid cases	218
a. 7 cells (35.0%) with expected counts less than 5. The minimum count expected is.50.
Symetric measures
		Value	asymptotic standard error	approx. Tb	approx. significance
Interval	Pearson´s R	0.10269	0.0671457	1.51726	.131c
Ordinal	Spearman correlation	0.105882	0.0679243	1.56494	.119c
# of valid cases		218
a. Null hypothesis is not asumed
b. Use of the asymptotic standard error that assumes the null hypothesis.
c. It is based on normal approximation.
AGE * CONTAINATION
Cross Tables
			CONTAINATION				Total
			ABSCENT	MILD	Teaching Teaching modeRATE	SEVERE
AGE	18 - 30	Counts	11	18	15	9	53
		% of AGE	0.207547	0.339623	0.283019	0.169811	1
	31 - 40	Counts	11	28	24	7	70
		% of AGE	0.157143	0.4	0.342857	0.1	1
	41 - 50	Counts	8	13	18	6	45
		% of AGE	0.177778	0.288889	0.4	0.133333	1
	51 - 60	Counts	7	11	10	8	36
		% of AGE	0.194444	0.305556	0.277778	0.222222	1
	above 60	Counts	1	3	4	3	11
		% of AGE	0.0909091	0.272727	0.363636	0.272727	1
Total		Counts	38	73	71	33	215
		% of AGE	0.176744	0.339535	0.330233	0.153488	1
Pruebas de chi-cuadrado
	Value	df	Asymptotic significance (bilateral)
Pearson´s Chi-squared	7.355a	12	0.833298
Verisimilitude	7.28598	12	0.838151
Linear association	1.52349	1	0.217093
# of valid cases	215
a. 4 cells (20.0%) with expected counts less than 5. The minimum count expected is1.69.
Symetric measures
		Value	asymptotic standard error	approx. Tb	approx. significance
Interval	Pearson´s R	0.0843747	0.0710816	1.23582	.218c
Ordinal	Spearman correlation	0.0770048	0.0708858	1.12719	.261c
# of valid cases		215
a. Null hypothesis is not asumed
b. Use of the asymptotic standard error that assumes the null hypothesis.
c. It is based on normal approximation.
AGE * FOBAP
Cross Tables
			FOBAP				Total
			ABSCENT	MILD	Teaching Teaching modeRATE	SEVERE
AGE	18 - 30	Counts	23	15	10	5	53
		% of AGE	0.433962	0.283019	0.188679	0.0943396	1
	31 - 40	Counts	23	31	15	4	73
		% of AGE	0.315068	0.424658	0.205479	0.0547945	1
	41 - 50	Counts	15	19	8	3	45
		% of AGE	0.333333	0.422222	0.177778	0.0666667	1
	51 - 60	Counts	18	11	5	2	36
		% of AGE	0.5	0.305556	0.138889	0.0555556	1
	above 60	Counts	9	0	2	0	11
		% of AGE	0.818182	0	0.181818	0	1
Total		Counts	88	76	40	14	218
		% of AGE	0.40367	0.348624	0.183486	0.0642202	1
Pruebas de chi-cuadrado
	Value	df	Asymptotic significance (bilateral)
Pearson´s Chi-squared	16.393a	12	0.173903
Verisimilitude	19.8102	12	0.0707634
Linear association	3.1583	1	0.0755419
# of valid cases	218
a. 8 cells (40.0%) with expected counts less than 5. The minimum count expected is.71.
Symetric measures
		Value	asymptotic standard error	approx. Tb	approx. significance
Interval	Pearson´s R	-0.120642	0.0683621	-1.78611	.075c
Ordinal	Spearman correlation	-0.101831	0.0703493	-1.50442	.134c
# of valid cases		218
a. Null hypothesis is not asumed
b. Use of the asymptotic standard error that assumes the null hypothesis.
c. It is based on normal approximation.
AGE * Teaching anxiety and preparedness
Cross Tables
			Teaching anxiety and preparedness				Total
			ABSCENT	MILD	Teaching Teaching modeRATE	SEVERE
AGE	18 - 30	Counts	4	39	10	0	53
		% of AGE	0.0754717	0.735849	0.188679	0	1
	31 - 40	Counts	4	46	23	0	73
		% of AGE	0.0547945	0.630137	0.315068	0	1
	41 - 50	Counts	4	28	13	0	45
		% of AGE	0.0888889	0.622222	0.288889	0	1
	51 - 60	Counts	1	17	18	0	36
		% of AGE	0.0277778	0.472222	0.5	0	1
	above 60	Counts	1	8	1	1	11
		% of AGE	0.0909091	0.727273	0.0909091	0.0909091	1
Total		Counts	14	138	65	1	218
		% of AGE	0.0642202	0.633028	0.298165	0.00458716	1
Pruebas de chi-cuadrado
	Value	df	Asymptotic significance (bilateral)
Pearson´s Chi-squared	31.553a	12	0.0016214
Verisimilitude	19.0233	12	0.087967
Linear association	3.91789	1	0.0477748
# of valid cases	218
a. 11 cells (55.0%) with expected counts less than 5. The minimum count expected is.05.
Symetric measures
		Value	asymptotic standard error	approx. Tb	approx. significance
Interval	Pearson´s R	0.134368	0.0696741	1.99287	.048c
Ordinal	Spearman correlation	0.13912	0.0663286	2.06472	.040c
# of valid cases		218
a. Null hypothesis is not asumed
b. Use of the asymptotic standard error that assumes the null hypothesis.
c. It is based on normal approximation.
AGE * RESILIENCE
Cross Tables
			RESILIENCE					Total
			Very low	Low	Normal	High	Very High
AGE	18 - 30	Counts	2	1	4	20	26	53
		% of AGE	0.0377358	0.0188679	0.0754717	0.377358	0.490566	1
	31 - 40	Counts	3	2	11	17	40	73
		% of AGE	0.0410959	0.0273973	0.150685	0.232877	0.547945	1
	41 - 50	Counts	1	1	5	15	23	45
		% of AGE	0.0222222	0.0222222	0.111111	0.333333	0.511111	1
	51 - 60	Counts	3	0	0	13	20	36
		% of AGE	0.0833333	0	0	0.361111	0.555556	1
	above 60	Counts	1	0	1	2	7	11
		% of AGE	0.0909091	0	0.0909091	0.181818	0.636364	1
Total		Counts	10	4	21	67	116	218
		% of AGE	0.0458716	0.0183486	0.0963303	0.307339	0.53211	1
Pruebas de chi-cuadrado
	Value	df	Asymptotic significance (bilateral)
Pearson´s Chi-squared	13.196a	16	0.658381
Verisimilitude	17.1058	16	0.378781
Linear association	0.0686987	1	0.793241
# of valid cases	218
a. 14 cells (56.0%) with expected counts less than 5. The minimum count expected is.20.
Symetric measures
		Value	asymptotic standard error	approx. Tb	approx. significance
Interval	Pearson´s R	0.0177928	0.0709487	0.261541	.794c
Ordinal	Spearman correlation	0.0442098	0.0661889	0.650384	.516c
# of valid cases		218
a. Null hypothesis is not asumed
b. Use of the asymptotic standard error that assumes the null hypothesis.
c. It is based on normal approximation.
AGE * TOTALSECTIONS
Cross Tables
			TOTALSECTIONS				Total
			ABSCENT	MILD	Teaching Teaching modeRATE	SEVERE
AGE	18 - 30	Counts	8	33	11	1	53
		% of AGE	0.150943	0.622642	0.207547	0.0188679	1
	31 - 40	Counts	12	30	28	3	73
		% of AGE	0.164384	0.410959	0.383562	0.0410959	1
	41 - 50	Counts	6	27	9	3	45
		% of AGE	0.133333	0.6	0.2	0.0666667	1
	51 - 60	Counts	8	14	13	1	36
		% of AGE	0.222222	0.388889	0.361111	0.0277778	1
	above 60	Counts	2	5	4	0	11
		% of AGE	0.181818	0.454545	0.363636	0	1
Total		Counts	36	109	65	8	218
		% of AGE	0.165138	0.5	0.298165	0.0366972	1
Pruebas de chi-cuadrado
	Value	df	Asymptotic significance (bilateral)
Pearson´s Chi-squared	13.072a	12	0.363804
Verisimilitude	13.4742	12	0.335535
Linear association	0.0931525	1	0.760207
# of valid cases	218
a. 7 cells (35.0%) with expected counts less than 5. The minimum count expected is.40.
Symetric measures
		Value	asymptotic standard error	approx. Tb	approx. significance
Interval	Pearson´s R	0.0207189	0.0657564	0.30457	.761c
Ordinal	Spearman correlation	0.0316888	0.0665729	0.465962	.642c
# of valid cases		218
a. Null hypothesis is not asumed
b. Use of the asymptotic standard error that assumes the null hypothesis.
c. It is based on normal approximation.
chi-squared test
18 to 30 years
Danger
	Counts	N esperada	Residue
Absent.00	7	13.25	-6.25
Mild.00	16	13.25	2.75
Moderate.00	22	13.25	8.75
Severe.00	8	13.25	-5.25
Total	53
Xenophobia
	Counts	N esperada	Residue
Absent.00	12	13.25	-1.25
Mild.00	23	13.25	9.75
Moderate.00	15	13.25	1.75
Severe.00	3	13.25	-10.25
Total	53
Traumatic Stress
	Counts	N esperada	Residue
Absent.00	37	13.25	23.75
Mild.00	12	13.25	-1.25
Moderate.00	2	13.25	-11.25
Severe.00	2	13.25	-11.25
Total	53
Compulsive Checking
	Counts	N esperada	Residue
Absent.00	25	13.25	11.75
Mild.00	23	13.25	9.75
Moderate.00	4	13.25	-9.25
Severe.00	1	13.25	-12.25
Total	53
Contamination
	Counts	N esperada	Residue
Absent.00	16	13.25	2.75
Mild.00	23	13.25	9.75
Moderate.00	13	13.25	-0.25
Severe.00	1	13.25	-12.25
Total	53
Social Economical
	Counts	N esperada	Residue
Absent.00	11	13.25	-2.25
Mild.00	18	13.25	4.75
Moderate.00	15	13.25	1.75
Severe.00	9	13.25	-4.25
Total	53
FOBAP
	Counts	N esperada	Residue
Absent.00	23	13.25	9.75
Mild.00	15	13.25	1.75
Moderate.00	10	13.25	-3.25
Severe.00	5	13.25	-8.25
Total	53
Teaching Anxeity and Preparedness
	Counts	N esperada	Residue
Absent.00	4	17.6667	-13.6667
Mild.00	39	17.6667	21.3333
Moderate.00	10	17.6667	-7.66667
Total	53
Resilience
	Counts	N esperada	Residue
Absent.00	2	10.6	-8.6
Mild.00	1	10.6	-9.6
Moderate.00	4	10.6	-6.6
Severe.00	20	10.6	9.4
Very High.00	26	10.6	15.4
Total	53
Total Sections
	Counts	N esperada	Residue
Absent.00	8	13.25	-5.25
Mild.00	33	13.25	19.75
Moderate.00	11	13.25	-2.25
Severe.00	1	13.25	-12.25
Total	53
Estadísticos de prueba
	Danger	Xenophobia	Traumatic Stress	Compulsive Checking	Contamination	Social Economical	FOBAP	Teaching Anxeity and Preparedness	Resilience	Total Sections
Chi-cuadrado	11.377a	15.453a	61.792a	35.377a	19.075a	3.679a	13.340a	39.660b	50.491c	43.226a
gl	3	3	3	3	3	3	3	2	4	3
Sig. asintótica	0.00985094	0.00146785	2.43339e-13	1.01391e-07	0.000263749	0.298248	0.00395686	2.44263e-09	2.8521e-10	2.20312e-09
a. 0 cells (0.0% ) has an expected frequency count lower than 5. The minimal expected cell count is 13.3
b. 0 cells (0.0% ) has an expected frequency count lower than 5. The minimal expected cell count is 17.7.
c. 0 cells (0.0% ) has an expected frequency count lower than 5. The minimal expected cell count is 10.6.
31 to 40 years
Danger
	Counts	N esperada	Residue
Absent.00	6	18.25	-12.25
Mild.00	23	18.25	4.75
Moderate.00	27	18.25	8.75
Severe.00	17	18.25	-1.25
Total	73
Xenophobia
	Counts	N esperada	Residue
Absent.00	17	18.25	-1.25
Mild.00	30	18.25	11.75
Moderate.00	22	18.25	3.75
Severe.00	4	18.25	-14.25
Total	73
Traumatic Stress
	Counts	N esperada	Residue
Absent.00	43	18.25	24.75
Mild.00	17	18.25	-1.25
Moderate.00	9	18.25	-9.25
Severe.00	4	18.25	-14.25
Total	73
Compulsive Checking
	Counts	N esperada	Residue
Absent.00	31	18.25	12.75
Mild.00	27	18.25	8.75
Moderate.00	13	18.25	-5.25
Severe.00	2	18.25	-16.25
Total	73
Contamination
	Counts	N esperada	Residue
Absent.00	14	18.25	-4.25
Mild.00	34	18.25	15.75
Moderate.00	21	18.25	2.75
Severe.00	4	18.25	-14.25
Total	73
Social Economical
	Counts	N esperada	Residue
Absent.00	11	17.5	-6.5
Mild.00	28	17.5	10.5
Moderate.00	24	17.5	6.5
Severe.00	7	17.5	-10.5
Total	70
FOBAP
	Counts	N esperada	Residue
Absent.00	23	18.25	4.75
Mild.00	31	18.25	12.75
Moderate.00	15	18.25	-3.25
Severe.00	4	18.25	-14.25
Total	73
Teaching Anxeity and Preparedness
	Counts	N esperada	Residue
Absent.00	4	24.3333	-20.3333
Mild.00	46	24.3333	21.6667
Moderate.00	23	24.3333	-1.33333
Total	73
Resilience
	Counts	N esperada	Residue
Absent.00	3	14.6	-11.6
Mild.00	2	14.6	-12.6
Moderate.00	11	14.6	-3.6
Severe.00	17	14.6	2.4
Very High.00	40	14.6	25.4
Total	73
Total Sections
	Counts	N esperada	Residue
Absent.00	12	18.25	-6.25
Mild.00	30	18.25	11.75
Moderate.00	28	18.25	9.75
Severe.00	3	18.25	-15.25
Total	73
Estadísticos de prueba
	Danger	Xenophobia	Traumatic Stress	Compulsive Checking	Contamination	Social Economical	FOBAP	Teaching Anxeity and Preparedness	Resilience	Total Sections
Chi-cuadrado	13.740a	19.548a	49.466a	29.082a	26.123a	17.429b	21.849a	36.356c	65.562d	27.658a
gl	3	3	3	3	3	3	3	2	4	3
Sig. asintótica	0.00328171	0.000210585	1.03817e-10	2.15212e-06	8.98701e-06	0.000576853	7.01138e-05	1.27456e-08	1.95948e-13	4.28566e-06
a. 0 cells (0.0% ) has an expected frequency count lower than 5. The minimal expected cell count is 18.3
b. 0 cells (0.0% ) has an expected frequency count lower than 5. The minimal expected cell count is 17.5
c. 0 cells (0.0% ) has an expected frequency count lower than 5. The minimal expected cell count is 24.3
d. 0 cells (0.0% ) has an expected frequency count lower than 5. The minimal expected cell count is 14.6.
41 to 50 years
Danger
	Counts	N esperada	Residue
Absent.00	2	11	-9
Mild.00	16	11	5
Moderate.00	22	11	11
Severe.00	4	11	-7
Total	44
Xenophobia
	Counts	N esperada	Residue
Absent.00	7	11	-4
Mild.00	22	11	11
Moderate.00	10	11	-1
Severe.00	5	11	-6
Total	44
Traumatic Stress
	Counts	N esperada	Residue
Absent.00	32	11	21
Mild.00	5	11	-6
Moderate.00	5	11	-6
Severe.00	2	11	-9
Total	44
Compulsive Checking
	Counts	N esperada	Residue
Absent.00	14	11	3
Mild.00	17	11	6
Moderate.00	9	11	-2
Severe.00	4	11	-7
Total	44
Contamination
	Counts	N esperada	Residue
Absent.00	6	11	-5
Mild.00	26	11	15
Moderate.00	8	11	-3
Severe.00	4	11	-7
Total	44
Social Economical
	Counts	N esperada	Residue
Absent.00	7	11	-4
Mild.00	13	11	2
Moderate.00	18	11	7
Severe.00	6	11	-5
Total	44
FOBAP
	Counts	N esperada	Residue
Absent.00	14	11	3
Mild.00	19	11	8
Moderate.00	8	11	-3
Severe.00	3	11	-8
Total	44
Teaching Anxeity and Preparedness
	Counts	N esperada	Residue
Absent.00	3	14.6667	-11.6667
Mild.00	28	14.6667	13.3333
Moderate.00	13	14.6667	-1.66667
Total	44
Resilience
	Counts	N esperada	Residue
Mild.00	1	11	-10
Moderate.00	5	11	-6
Severe.00	15	11	4
Very High.00	23	11	12
Total	44
Total Sections
	Counts	N esperada	Residue
Absent.00	5	11	-6
Mild.00	27	11	16
Moderate.00	9	11	-2
Severe.00	3	11	-8
Total	44
Estadísticos de prueba
	Danger	Xenophobia	Traumatic Stress	Compulsive Checking	Contamination	Social Economical	FOBAP	Teaching Anxeity and Preparedness	Resilience	Total Sections
Chi-cuadrado	25.091a	15.818a	54.000a	8.909a	28.000a	8.545a	13.273a	21.591b	26.909a	32.727a
gl	3	3	3	3	3	3	3	2	3	3
Sig. asintótica	1.47792e-05	0.00123558	1.12206e-11	0.0305243	3.63204e-06	0.0359865	0.00408245	2.04924e-05	6.15145e-06	3.67678e-07
a. 0 cells (0.0% ) has an expected frequency count lower than 5. The minimal expected cell count is 117.0.
b. 0 cells (0.0% ) has an expected frequency count lower than 5. The minimal expected cell count is 14.7.
51 to 60 years
Danger
	Counts	N esperada	Residue
Absent.00	5	9	-4
Mild.00	9	9	0
Moderate.00	16	9	7
Severe.00	6	9	-3
Total	36
Xenophobia
	Counts	N esperada	Residue
Absent.00	9	9	0
Mild.00	12	9	3
Moderate.00	13	9	4
Severe.00	2	9	-7
Total	36
Traumatic Stress
	Counts	N esperada	Residue
Absent.00	23	9	14
Mild.00	11	9	2
Moderate.00	1	9	-8
Severe.00	1	9	-8
Total	36
Compulsive Checking
	Counts	N esperada	Residue
Absent.00	16	9	7
Mild.00	13	9	4
Moderate.00	4	9	-5
Severe.00	3	9	-6
Total	36
Contamination
	Counts	N esperada	Residue
Absent.00	6	12	-6
Mild.00	17	12	5
Moderate.00	13	12	1
Total	36
Social Economical
	Counts	N esperada	Residue
Absent.00	7	9	-2
Mild.00	11	9	2
Moderate.00	10	9	1
Severe.00	8	9	-1
Total	36
FOBAP
	Counts	N esperada	Residue
Absent.00	18	9	9
Mild.00	11	9	2
Moderate.00	5	9	-4
Severe.00	2	9	-7
Total	36
Teaching Anxeity and Preparedness
	Counts	N esperada	Residue
Absent.00	1	12	-11
Mild.00	17	12	5
Moderate.00	18	12	6
Total	36
Resilience
	Counts	N esperada	Residue
Absent.00	3	12	-9
Severe.00	13	12	1
Very High.00	20	12	8
Total	36
Total Sections
	Counts	N esperada	Residue
Absent.00	8	9	-1
Mild.00	14	9	5
Moderate.00	13	9	4
Severe.00	1	9	-8
Total	36
Estadísticos de prueba
	Danger	Xenophobia	Traumatic Stress	Compulsive Checking	Contamination	Social Economical	FOBAP	Teaching Anxeity and Preparedness	Resilience	Total Sections
Chi-cuadrado	8.222a	8.222a	36.444a	14.000a	5.167b	1.111a	16.667a	15.167b	12.167b	11.778a
gl	3	3	3	3	2	3	3	2	2	3
Sig. asintótica	0.0416355	0.0416355	6.03123e-08	0.00290515	0.0755218	0.774393	0.000827525	0.000508862	0.00228056	0.00818449
a. 0 cells (0.0% ) has an expected frequency count lower than 5. The minimal expected cell count is 9.0.
b. 0 cells (0.0% ) has an expected frequency count lower than 5. The minimal expected cell count is 12.0.
Above 60 years
Danger
	Counts	N esperada	Residue
Mild.00	5	3.66667	1.33333
Moderate.00	5	3.66667	1.33333
Severe.00	1	3.66667	-2.66667
Total	11
Xenophobia
	Counts	N esperada	Residue
Absent.00	1	2.75	-1.75
Mild.00	4	2.75	1.25
Moderate.00	5	2.75	2.25
Severe.00	1	2.75	-1.75
Total	11
Traumatic Stress
	Counts	N esperada	Residue
Absent.00	6	3.66667	2.33333
Mild.00	4	3.66667	0.333333
Moderate.00	1	3.66667	-2.66667
Total	11
Compulsive Checking
	Counts	N esperada	Residue
Absent.00	6	2.75	3.25
Mild.00	2	2.75	-0.75
Moderate.00	2	2.75	-0.75
Severe.00	1	2.75	-1.75
Total	11
Contamination
	Counts	N esperada	Residue
Absent.00	2	2.75	-0.75
Mild.00	4	2.75	1.25
Moderate.00	4	2.75	1.25
Severe.00	1	2.75	-1.75
Total	11
Social Economical
	Counts	N esperada	Residue
Absent.00	1	2.75	-1.75
Mild.00	3	2.75	0.25
Moderate.00	4	2.75	1.25
Severe.00	3	2.75	0.25
Total	11
FOBAP
	Counts	N esperada	Residue
Absent.00	9	5.5	3.5
Moderate.00	2	5.5	-3.5
Total	11
Teaching Anxeity and Preparedness
	Counts	N esperada	Residue
Absent.00	1	2.75	-1.75
Mild.00	8	2.75	5.25
Moderate.00	1	2.75	-1.75
Severe.00	1	2.75	-1.75
Total	11
Resilience
	Counts	N esperada	Residue
Absent.00	1	2.75	-1.75
Moderate.00	1	2.75	-1.75
Severe.00	2	2.75	-0.75
Very High.00	7	2.75	4.25
Total	11
Total Sections
	Counts	N esperada	Residue
Absent.00	2	3.66667	-1.66667
Mild.00	5	3.66667	1.33333
Moderate.00	4	3.66667	0.333333
Total	11
Estadísticos de prueba
	Danger	Xenophobia	Traumatic Stress	Compulsive Checking	Contamination	Social Economical	FOBAP	Teaching Anxeity and Preparedness	Resilience	Total Sections
Chi-cuadrado	2.909a	4.636b	3.455a	5.364b	2.455b	1.727b	4.455c	13.364b	9.000b	1.273a
gl	2	3	2	3	3	3	1	3	3	2
Sig. asintótica	0.233506	0.200445	0.177769	0.147026	0.483562	0.630888	0.0348085	0.00391271	0.0292909	0.529213
a. Moderate casillas (Absent00.0%) haExpected Counts frecuencias menores que Very High. La frecuencia mínima de casilla esperada es 3.7.
b. Severe casillas (Absent00.0%) haExpected Counts frecuencias menores que Very High. La frecuencia mínima de casilla esperada es 2.8.
c. 0 cells (0.0% ) has an expected frequency count lower than 5. The minimal expected cell count is 5.5.
