# Supplementary material for: Teaching Anxiety, Stress and Resilience during the COVID-19 Pandemic: Evaluating the Vulnerability of Academic Professionals in Mexico through the Adapted COVID-19 Stress Scales
Source: Preprints.org preprint supplement (doi:10.20944/preprints202101.0406.v1), 2021-01-20
Supplement: Supplementary file 2 [file Table S1.xlsx]

## Sheet: Supplemental Table 1
GENDER * DANGER
Cross Tables
			DANGER				Total
			ABSCENT	MILD	Teaching Teaching modeRATE	SEVERE
GENDER	Female	Counts	14	48	65	30	157
		% of GENDER	0.089172	0.305732	0.414013	0.191083	1
	Male	Counts	6	22	28	6	62
		% of GENDER	0.0967742	0.354839	0.451613	0.0967742	1
	Other	Counts	1	0	0	0	1
		% of GENDER	1	0	0	0	1
Total		Counts	21	70	93	36	220
		% of GENDER	0.0954545	0.318182	0.422727	0.163636	1
Pruebas de chi-cuadrado
	Value	df	Asymptotic significance (bilateral)
Pearson´s Chi-squared	12.448a	6	0.0526942
Verisimilitude	7.91677	6	0.244265
Linear association	2.76144	1	0.0965613
# of valid cases	220
a. 4 cells (33.3%) with expected counts less than 5. The minimum count expected is.10.
Symetric measures
		Value	asymptotic standard error	approx. Tb	approx. significance
Interval	Pearson´s R	-0.112291	0.0678301	-1.66851	.097c
Ordinal	Spearman correlation	-0.0988319	0.0653763	-1.46642	.144c
# of valid cases		220
a. Null hypothesis is not asumed
b. Use of the asymptotic standard error that assumes the null hypothesis.
c. It is based on normal approximation.
GENDER * XENOPHOBIA
Cross Tables
			XENOPHOBIA				Total
			ABSCENT	MILD	Teaching Teaching modeRATE	SEVERE
GENDER	Female	Counts	32	67	47	11	157
		% of GENDER	0.203822	0.426752	0.299363	0.0700637	1
	Male	Counts	14	25	19	4	62
		% of GENDER	0.225806	0.403226	0.306452	0.0645161	1
	Other	Counts	1	0	0	0	1
		% of GENDER	1	0	0	0	1
Total		Counts	47	92	66	15	220
		% of GENDER	0.213636	0.418182	0.3	0.0681818	1
Pruebas de chi-cuadrado
	Value	df	Asymptotic significance (bilateral)
Pearson´s Chi-squared	3.885a	6	0.692296
Verisimilitude	3.29128	6	0.771499
Linear association	0.302041	1	0.582605
# of valid cases	220
a. 5 cells (41.7%) with expected counts less than 5. The minimum count expected is.07.
Symetric measures
		Value	asymptotic standard error	approx. Tb	approx. significance
Interval	Pearson´s R	-0.0371374	0.0692469	-0.548705	.584c
Ordinal	Spearman correlation	-0.0266058	0.0684854	-0.392969	.695c
# of valid cases		220
a. Null hypothesis is not asumed
b. Use of the asymptotic standard error that assumes the null hypothesis.
c. It is based on normal approximation.
GENDER * TRAUMATIC STRESS
Cross Tables
			TRAUMATIC STRESS				Total
			ABSCENT	MILD	Teaching Teaching modeRATE	SEVERE
GENDER	Female	Counts	101	33	14	9	157
		% of GENDER	0.643312	0.210191	0.089172	0.0573248	1
	Male	Counts	42	16	4	0	62
		% of GENDER	0.677419	0.258065	0.0645161	0	1
	Other	Counts	1	0	0	0	1
		% of GENDER	1	0	0	0	1
Total		Counts	144	49	18	9	220
		% of GENDER	0.654545	0.222727	0.0818182	0.0409091	1
Pruebas de chi-cuadrado
	Value	df	Asymptotic significance (bilateral)
Pearson´s Chi-squared	4.967a	6	0.548032
Verisimilitude	7.70716	6	0.260352
Linear association	2.34789	1	0.125453
# of valid cases	220
a. 5 cells (41.7%) with expected counts less than 5. The minimum count expected is.04.
Symetric measures
		Value	asymptotic standard error	approx. Tb	approx. significance
Interval	Pearson´s R	-0.103542	0.0539351	-1.53704	.126c
Ordinal	Spearman correlation	-0.0638056	0.0634911	-0.944001	.346c
# of valid cases		220
a. Null hypothesis is not asumed
b. Use of the asymptotic standard error that assumes the null hypothesis.
c. It is based on normal approximation.
GENDER * COMPULSIVE CHECKING
Cross Tables
			COMPULSIVE CHECKING				Total
			ABSCENT	MILD	Teaching Teaching modeRATE	SEVERE
GENDER	Female	Counts	67	57	24	9	157
		% of GENDER	0.426752	0.363057	0.152866	0.0573248	1
	Male	Counts	27	25	8	2	62
		% of GENDER	0.435484	0.403226	0.129032	0.0322581	1
	Other	Counts	1	0	0	0	1
		% of GENDER	1	0	0	0	1
Total		Counts	95	82	32	11	220
		% of GENDER	0.431818	0.372727	0.145455	0.05	1
Pruebas de chi-cuadrado
	Value	df	Asymptotic significance (bilateral)
Pearson´s Chi-squared	2.254a	6	0.894898
Verisimilitude	2.66683	6	0.849349
Linear association	0.728068	1	0.39351
# of valid cases	220
a. 5 cells (41.7%) with expected counts less than 5. The minimum count expected is.05.
Symetric measures
		Value	asymptotic standard error	approx. Tb	approx. significance
Interval	Pearson´s R	-0.0576586	0.0636937	-0.852737	.395c
Ordinal	Spearman correlation	-0.0414885	0.0658049	-0.613098	.540c
# of valid cases		220
a. Null hypothesis is not asumed
b. Use of the asymptotic standard error that assumes the null hypothesis.
c. It is based on normal approximation.
GENDER * SOCIAL ECONOMICAL
Cross Tables
			SOCIAL ECONOMICAL				Total
			ABSCENT	MILD	Teaching Teaching modeRATE	SEVERE
GENDER	Female	Counts	29	75	44	9	157
		% of GENDER	0.184713	0.477707	0.280255	0.0573248	1
	Male	Counts	16	30	15	1	62
		% of GENDER	0.258065	0.483871	0.241935	0.016129	1
	Other	Counts	1	0	0	0	1
		% of GENDER	1	0	0	0	1
Total		Counts	46	105	59	10	220
		% of GENDER	0.209091	0.477273	0.268182	0.0454545	1
Pruebas de chi-cuadrado
	Value	df	Asymptotic significance (bilateral)
Pearson´s Chi-squared	6.850a	6	0.334941
Verisimilitude	6.52376	6	0.367139
Linear association	3.70818	1	0.0541463
# of valid cases	220
a. 5 cells (41.7%) with expected counts less than 5. The minimum count expected is.05.
Symetric measures
		Value	asymptotic standard error	approx. Tb	approx. significance
Interval	Pearson´s R	-0.130124	0.065023	-1.93774	.054c
Ordinal	Spearman correlation	-0.116384	0.0664484	-1.73015	.085c
# of valid cases		220
a. Null hypothesis is not asumed
b. Use of the asymptotic standard error that assumes the null hypothesis.
c. It is based on normal approximation.
GENDER * CONTAINATION
Cross Tables
			CONTAINATION				Total
			ABSCENT	MILD	Teaching Teaching modeRATE	SEVERE
GENDER	Female	Counts	22	54	53	26	155
		% of GENDER	0.141935	0.348387	0.341935	0.167742	1
	Male	Counts	15	20	19	7	61
		% of GENDER	0.245902	0.327869	0.311475	0.114754	1
	Other	Counts	1	0	0	0	1
		% of GENDER	1	0	0	0	1
Total		Counts	38	74	72	33	217
		% of GENDER	0.175115	0.341014	0.331797	0.152074	1
Pruebas de chi-cuadrado
	Value	df	Asymptotic significance (bilateral)
Pearson´s Chi-squared	8.419a	6	0.208995
Verisimilitude	7.10978	6	0.310814
Linear association	4.0088	1	0.0452635
# of valid cases	217
a. 4 cells (33.3%) with expected counts less than 5. The minimum count expected is.15.
Symetric measures
		Value	asymptotic standard error	approx. Tb	approx. significance
Interval	Pearson´s R	-0.136232	0.0688509	-2.01636	.045c
Ordinal	Spearman correlation	-0.124134	0.0684943	-1.83436	.068c
# of valid cases		217
a. Null hypothesis is not asumed
b. Use of the asymptotic standard error that assumes the null hypothesis.
c. It is based on normal approximation.
GENDER * FOBAP
Cross Tables
			FOBAP				Total
			ABSCENT	MILD	Teaching Teaching modeRATE	SEVERE
GENDER	Female	Counts	60	56	31	10	157
		% of GENDER	0.382166	0.356688	0.197452	0.0636943	1
	Male	Counts	29	20	9	4	62
		% of GENDER	0.467742	0.322581	0.145161	0.0645161	1
	Other	Counts	1	0	0	0	1
		% of GENDER	1	0	0	0	1
Total		Counts	90	76	40	14	220
		% of GENDER	0.409091	0.345455	0.181818	0.0636364	1
Pruebas de chi-cuadrado
	Value	df	Asymptotic significance (bilateral)
Pearson´s Chi-squared	3.065a	6	0.800607
Verisimilitude	3.4216	6	0.75437
Linear association	1.45249	1	0.228128
# of valid cases	220
a. 5 cells (41.7%) with expected counts less than 5. The minimum count expected is.06.
Symetric measures
		Value	asymptotic standard error	approx. Tb	approx. significance
Interval	Pearson´s R	-0.0814395	0.066708	-1.20645	.229c
Ordinal	Spearman correlation	-0.0858629	0.0672503	-1.27245	.205c
# of valid cases		220
a. Null hypothesis is not asumed
b. Use of the asymptotic standard error that assumes the null hypothesis.
c. It is based on normal approximation.
GENDER * Teaching anxiety and preparedness
Cross Tables
			Teaching anxiety and preparedness				Total
			ABSCENT	MILD	Teaching Teaching modeRATE	SEVERE
GENDER	Female	Counts	9	93	55	0	157
		% of GENDER	0.0573248	0.592357	0.350318	0	1
	Male	Counts	4	47	10	1	62
		% of GENDER	0.0645161	0.758065	0.16129	0.016129	1
	Other	Counts	1	0	0	0	1
		% of GENDER	1	0	0	0	1
Total		Counts	14	140	65	1	220
		% of GENDER	0.0636364	0.636364	0.295455	0.00454545	1
Pruebas de chi-cuadrado
	Value	df	Asymptotic significance (bilateral)
Pearson´s Chi-squared	24.655a	6	0.000395543
Verisimilitude	16.0226	6	0.0136333
Linear association	5.83758	1	0.0156874
# of valid cases	220
a. 7 cells (58.3%) with expected counts less than 5. The minimum count expected is.00.
Symetric measures
		Value	asymptotic standard error	approx. Tb	approx. significance
Interval	Pearson´s R	-0.163265	0.0698494	-2.44337	.015c
Ordinal	Spearman correlation	-0.165988	0.063203	-2.48525	.014c
# of valid cases		220
a. Null hypothesis is not asumed
b. Use of the asymptotic standard error that assumes the null hypothesis.
c. It is based on normal approximation.
GENDER * RESILIENCE
Cross Tables
			RESILIENCE					Total
			Very low	Low	Normal	High	Very High
GENDER	Female	Counts	7	2	16	51	81	157
		% of GENDER	0.044586	0.0127389	0.101911	0.324841	0.515924	1
	Male	Counts	2	2	5	16	37	62
		% of GENDER	0.0322581	0.0322581	0.0806452	0.258065	0.596774	1
	Other	Counts	1	0	0	0	0	1
		% of GENDER	1	0	0	0	0	1
Total		Counts	10	4	21	67	118	220
		% of GENDER	0.0454545	0.0181818	0.0954545	0.304545	0.536364	1
Pruebas de chi-cuadrado
	Value	df	Asymptotic significance (bilateral)
Pearson´s Chi-squared	23.579a	8	0.00269527
Verisimilitude	8.70336	8	0.367935
Linear association	0.0273083	1	0.868745
# of valid cases	220
a. 8 cells (53.3%) with expected counts less than 5. The minimum count expected is.02.
Symetric measures
		Value	asymptotic standard error	approx. Tb	approx. significance
Interval	Pearson´s R	-0.0111667	0.0828273	-0.164885	.869c
Ordinal	Spearman correlation	0.0443143	0.068841	0.654936	.513c
# of valid cases		220
a. Null hypothesis is not asumed
b. Use of the asymptotic standard error that assumes the null hypothesis.
c. It is based on normal approximation.
GENDER * TOTALSECTIONS
Cross Tables
			TOTALSECTIONS				Total
			ABSCENT	MILD	Teaching Teaching modeRATE	SEVERE
GENDER	Female	Counts	23	79	48	7	157
		% of GENDER	0.146497	0.503185	0.305732	0.044586	1
	Male	Counts	13	31	17	1	62
		% of GENDER	0.209677	0.5	0.274194	0.016129	1
	Other	Counts	1	0	0	0	1
		% of GENDER	1	0	0	0	1
Total		Counts	37	110	65	8	220
		% of GENDER	0.168182	0.5	0.295455	0.0363636	1
Pruebas de chi-cuadrado
	Value	df	Asymptotic significance (bilateral)
Pearson´s Chi-squared	7.164a	6	0.30596
Verisimilitude	5.92394	6	0.431765
Linear association	2.85886	1	0.0908717
# of valid cases	220
a. 5 cells (41.7%) with expected counts less than 5. The minimum count expected is.04.
Symetric measures
		Value	asymptotic standard error	approx. Tb	approx. significance
Interval	Pearson´s R	-0.114255	0.0673047	-1.69807	.091c
Ordinal	Spearman correlation	-0.0990145	0.0675221	-1.46915	.143c
# of valid cases		220
a. Null hypothesis is not asumed
b. Use of the asymptotic standard error that assumes the null hypothesis.
c. It is based on normal approximation.
chi-squared test
Females
Danger
	Counts	N esperada	Residue
Absent.00	14	39.25	-25.25
Mild.00	48	39.25	8.75
Moderate.00	65	39.25	25.75
Severe.00	30	39.25	-9.25
Total	157
Xenophobia
	Counts	N esperada	Residue
Absent.00	32	39.25	-7.25
Mild.00	67	39.25	27.75
Moderate.00	47	39.25	7.75
Severe.00	11	39.25	-28.25
Total	157
Traumatic Stress
	Counts	N esperada	Residue
Absent.00	101	39.25	61.75
Mild.00	33	39.25	-6.25
Moderate.00	14	39.25	-25.25
Severe.00	9	39.25	-30.25
Total	157
Compulsive Checking
	Counts	N esperada	Residue
Absent.00	67	39.25	27.75
Mild.00	57	39.25	17.75
Moderate.00	24	39.25	-15.25
Severe.00	9	39.25	-30.25
Total	157
Contamination
	Counts	N esperada	Residue
Absent.00	29	39.25	-10.25
Mild.00	75	39.25	35.75
Moderate.00	44	39.25	4.75
Severe.00	9	39.25	-30.25
Total	157
Social Economical
	Counts	N esperada	Residue
Absent.00	22	38.75	-16.75
Mild.00	54	38.75	15.25
Moderate.00	53	38.75	14.25
Severe.00	26	38.75	-12.75
Total	155
FOBAP
	Counts	N esperada	Residue
Absent.00	60	39.25	20.75
Mild.00	56	39.25	16.75
Moderate.00	31	39.25	-8.25
Severe.00	10	39.25	-29.25
Total	157
Teaching Anxeity and Preparedness
	Counts	N esperada	Residue
Absent.00	9	52.3333	-43.3333
Mild.00	93	52.3333	40.6667
Moderate.00	55	52.3333	2.66667
Total	157
Resilience
	Counts	N esperada	Residue
Very Low	7	31.4	-24.4
Low	2	31.4	-29.4
Normal	16	31.4	-15.4
High	51	31.4	19.6
Very High.00	81	31.4	49.6
Total	157
Total Sections
	Counts	N esperada	Residue
Absent.00	23	39.25	-16.25
Mild.00	79	39.25	39.75
Moderate.00	48	39.25	8.75
Severe.00	7	39.25	-32.25
Total	157
Estadísticos de prueba
	Danger	Xenophobia	Traumatic Stress	Compulsive Checking	Contamination	Social Economical	FOBAP	Teaching Anxeity and Preparedness	Resilience	Total Sections
Chi-cuadrado	37.268a	42.822a	137.701a	56.885a	59.127a	22.677b	41.650a	67.618c	144.624d	75.433a
gl	3	3	3	3	3	3	3	2	4	3
Sig. asintótica	4.03909e-08	2.68519e-09	1.18363e-29	2.71886e-12	9.02926e-13	4.71431e-05	4.76111e-09	2.07479e-15	2.88688e-30	2.926e-16
a. 0 cells (0.0% ) has an expected frequency count lower than 5. The minimal expected cell count is 39.3
b. 0 cells (0.0% ) has an expected frequency count lower than 5. The minimal expected cell count is 38.8.
c. 0 cells (0.0% ) has an expected frequency count lower than 5. The minimal expected cell count is 52.3
d. 0 cells (0.0% ) has an expected frequency count lower than 5. The minimal expected cell count is 31.4
MALE
Danger
	Counts	N esperada	Residue
Absent.00	6	15.5	-9.5
Mild.00	22	15.5	6.5
Moderate.00	28	15.5	12.5
Severe.00	6	15.5	-9.5
Total	62
Xenophobia
	Counts	N esperada	Residue
Absent.00	14	15.5	-1.5
Mild.00	25	15.5	9.5
Moderate.00	19	15.5	3.5
Severe.00	4	15.5	-11.5
Total	62
Traumatic Stress
	Counts	N esperada	Residue
Absent.00	42	20.6667	21.3333
Mild.00	16	20.6667	-4.66667
Moderate.00	4	20.6667	-16.6667
Total	62
Compulsive Checking
	Counts	N esperada	Residue
Absent.00	27	15.5	11.5
Mild.00	25	15.5	9.5
Moderate.00	8	15.5	-7.5
Severe.00	2	15.5	-13.5
Total	62
Contamination
	Counts	N esperada	Residue
Absent.00	16	15.5	0.5
Mild.00	30	15.5	14.5
Moderate.00	15	15.5	-0.5
Severe.00	1	15.5	-14.5
Total	62
Social Economical
	Counts	N esperada	Residue
Absent.00	15	15.25	-0.25
Mild.00	20	15.25	4.75
Moderate.00	19	15.25	3.75
Severe.00	7	15.25	-8.25
Total	61
FOBAP
	Counts	N esperada	Residue
Absent.00	29	15.5	13.5
Mild.00	20	15.5	4.5
Moderate.00	9	15.5	-6.5
Severe.00	4	15.5	-11.5
Total	62
Teaching Anxeity and Preparedness
	Counts	N esperada	Residue
Absent.00	4	15.5	-11.5
Mild.00	47	15.5	31.5
Moderate.00	10	15.5	-5.5
Severe.00	1	15.5	-14.5
Total	62
Resilience
	Counts	N esperada	Residue
Absent.00	2	12.4	-10.4
Mild.00	2	12.4	-10.4
Moderate.00	5	12.4	-7.4
Severe.00	16	12.4	3.6
Very High.00	37	12.4	24.6
Total	62
Total Sections
	Counts	N esperada	Residue
Absent.00	13	15.5	-2.5
Mild.00	31	15.5	15.5
Moderate.00	17	15.5	1.5
Severe.00	1	15.5	-14.5
Total	62
Estadísticos de prueba
	Danger	Xenophobia	Traumatic Stress	Compulsive Checking	Contamination	Social Economical	FOBAP	Teaching Anxeity and Preparedness	Resilience	Total Sections
Chi-cuadrado	24.452a	15.290a	36.516b	29.742a	27.161a	6.869c	24.323a	88.065a	71.710d	29.613a
gl	3	3	2	3	3	3	3	3	4	3
Sig. asintótica	2.01036e-05	0.00158463	1.17659e-08	1.56377e-06	5.44632e-06	0.0761975	2.13909e-05	5.70458e-19	9.88407e-15	1.66459e-06
a. 0 cells (0.0% ) has an expected frequency count lower than 5. The minimal expected cell count is 15.5
b. 0 cells (0.0% ) has an expected frequency count lower than 5. The minimal expected cell count is 20.7
c. 0 cells (0.0% ) has an expected frequency count lower than 5. The minimal expected cell count is 15.3
d. 0 cells (0.0% ) has an expected frequency count lower than 5. The minimal expected cell count is 12.4
