# Supplementary material for: Teaching Anxiety, Stress and Resilience during the COVID-19 Pandemic: Evaluating the Vulnerability of Academic Professionals in Mexico through the Adapted COVID-19 Stress Scales
Source: Preprints.org preprint supplement (doi:10.20944/preprints202101.0406.v1), 2021-01-20
Supplement: Supplementary file 3 [file Table S10.xlsx]

## Sheet: Supplemental Table 10
Teaching anxiety and preparedness * DANGER
Cross Tables
			DANGER				Total
			ABSENT	MILD	Teaching Teaching modeRATE	SEVERE
Teaching anxiety and preparedness	1	Counts	4	7	3	0	14
		% of Teaching anxiety and preparedness	0.285714	0.5	0.214286	0	1
	2	Counts	15	48	63	14	140
		% of Teaching anxiety and preparedness	0.107143	0.342857	0.45	0.1	1
	3	Counts	2	15	27	21	65
		% of Teaching anxiety and preparedness	0.0307692	0.230769	0.415385	0.323077	1
	4	Counts
		% of Teaching anxiety and preparedness					1
Total		Counts	21	70	93	36	220
		% of Teaching anxiety and preparedness	0.0954545	0.318182	0.422727	0.163636	1
Chi-squared tests
	Value	df	Asymptotic significance (bilateral)
Pearson´s Chi-squared	34.300a	9	7.9119e-05
Verisimilitude	32.8255	9	0.000143221
Linear association	26.5076	1	2.62504e-07
# of valid cases	220
a. 7 cells (43.8%) with expected counts lower than 5. The expected minimal count is .10.
Symmetric measures
		Value	Asymptotic standard error a	Approx. Tb	Approx. significance
Interval	Pearson´s R	0.347907	0.059051	5.47907	.000c
Ordinal	Spearman´s Correlation	0.334501	0.0611802	5.24073	.000c
# of valid cases		220
a. The null hypothesis is not assumed.
b. Use of the asymptotic standard error that assumes the null hypothesis.
c. Is based on the normal approximation
Teaching anxiety and preparedness * XENOPHOBIA
Cross Tables
			XENOPHOBIA				Total
			ABSENT	MILD	Teaching Teaching modeRATE	SEVERE
Teaching anxiety and preparedness	1	Counts	7	2	1	0	10
		% of Teaching anxiety and preparedness	0.285714	0.571429	0.0714286	0.0714286	1
	2	Counts	37	56	38	9	140
		% of Teaching anxiety and preparedness	0.264286	0.4	0.271429	0.0642857	1
	3	Counts	6	28	26	5	65
		% of Teaching anxiety and preparedness	0.0923077	0.430769	0.4	0.0769231	1
	4	Counts	0	0	1	0	1
		% of Teaching anxiety and preparedness	0	0	1	0	1
Total		Counts	47	92	66	15	220
		% of Teaching anxiety and preparedness	0.213636	0.418182	0.3	0.0681818	1
Chi-squared tests
	Value	df	Asymptotic significance (bilateral)
Pearson´s Chi-squared	14.847a	9	0.0952206
Verisimilitude	16.8087	9	0.0517977
Linear association	8.6427	1	0.00328375
# of valid cases	220
a. 8 cells (50.0%) with expected counts lower than 5. The expected minimal count is .07.
Symmetric measures
		Value	Asymptotic standard error a	Approx. Tb	Approx. significance
Interval	Pearson´s R	0.198656	0.0611914	2.99277	.003c
Ordinal	Spearman´s Correlation	0.209806	0.060997	3.16826	.002c
# of valid cases		220
a. The null hypothesis is not assumed.
b. Use of the asymptotic standard error that assumes the null hypothesis.
c. Is based on the normal approximation
Teaching anxiety and preparedness * TRAUMATIC STRESS
Cross Tables
			TRAUMATIC STRESS				Total
			ABSENT	MILD	Teaching Teaching modeRATE	SEVERE
Teaching anxiety and preparedness	1	Counts	9	3	1	1	14
		% of Teaching anxiety and preparedness	0.642857	0.214286	0.0714286	0.0714286	1
	2	Counts	96	31	10	3	140
		% of Teaching anxiety and preparedness	0.685714	0.221429	0.0714286	0.0214286	1
	3	Counts	39	14	7	5	65
		% of Teaching anxiety and preparedness	0.6	0.215385	0.107692	0.0769231	1
	4	Counts	0	1	0	0	1
		% of Teaching anxiety and preparedness	0	1	0	0	1
Total		Counts	144	49	18	9	220
		% of Teaching anxiety and preparedness	0.654545	0.222727	0.0818182	0.0409091	1
Chi-squared tests
	Value	df	Asymptotic significance (bilateral)
Pearson´s Chi-squared	8.431a	9	0.491407
Verisimilitude	7.69993	9	0.564646
Linear association	2.15861	1	0.141773
# of valid cases	220
a. 8 cells (50.0%) with expected counts lower than 5. The expected minimal count is .04.
Symmetric measures
		Value	Asymptotic standard error a	Approx. Tb	Approx. significance
Interval	Pearson´s R	0.0992808	0.0736678	1.47314	.142c
Ordinal	Spearman´s Correlation	0.0912588	0.0706475	1.35307	.177c
# of valid cases		220
a. The null hypothesis is not assumed.
b. Use of the asymptotic standard error that assumes the null hypothesis.
c. Is based on the normal approximation
Teaching anxiety and preparedness * COMPULSIVE CHECKING
Cross Tables
			COMPULSIVE CHECKING				Total
			ABSENT	MILD	Teaching Teaching modeRATE	SEVERE
Teaching anxiety and preparedness	1	Counts	8	3	3	0	14
		% of Teaching anxiety and preparedness	0.571429	0.214286	0.214286	0	1
	2	Counts	64	54	15	7	140
		% of Teaching anxiety and preparedness	0.457143	0.385714	0.107143	0.05	1
	3	Counts	23	25	13	4	65
		% of Teaching anxiety and preparedness	0.353846	0.384615	0.2	0.0615385	1
	4	Counts	0	0	1	0	1
		% of Teaching anxiety and preparedness	0	0	1	0	1
Total		Counts	95	82	32	11	220
		% of Teaching anxiety and preparedness	0.431818	0.372727	0.145455	0.05	1
Chi-squared tests
	Value	df	Asymptotic significance (bilateral)
Pearson´s Chi-squared	12.732a	9	0.175099
Verisimilitude	11.5145	9	0.242085
Linear association	4.22487	1	0.0398356
# of valid cases	220
a. 7 cells (43.8%) with expected counts lower than 5. The expected minimal count is .05.
Symmetric measures
		Value	Asymptotic standard error a	Approx. Tb	Approx. significance
Interval	Pearson´s R	0.138894	0.0674016	2.07082	.040c
Ordinal	Spearman´s Correlation	0.139339	0.0682969	2.07758	.039c
# of valid cases		220
a. The null hypothesis is not assumed.
b. Use of the asymptotic standard error that assumes the null hypothesis.
c. Is based on the normal approximation
Teaching anxiety and preparedness * SOCIAL ECONOMICAL
Cross Tables
			SOCIAL ECONOMICAL				Total
			ABSENT	MILD	Teaching Teaching modeRATE	SEVERE
Teaching anxiety and preparedness	1	Counts	6	6	2	0	14
		% of Teaching anxiety and preparedness	0.428571	0.428571	0.142857	0	1
	2	Counts	37	66	31	6	140
		% of Teaching anxiety and preparedness	0.264286	0.471429	0.221429	0.0428571	1
	3	Counts	3	33	25	4	65
		% of Teaching anxiety and preparedness	0.0461538	0.507692	0.384615	0.0615385	1
	4	Counts	0	0	1	0	1
		% of Teaching anxiety and preparedness	0	0	1	0	1
Total		Counts	46	105	59	10	220
		% of Teaching anxiety and preparedness	0.209091	0.477273	0.268182	0.0454545	1
Chi-squared tests
	Value	df	Asymptotic significance (bilateral)
Pearson´s Chi-squared	22.727a	9	0.0068403
Verisimilitude	26.0253	9	0.00202361
Linear association	17.5183	1	2.8455e-05
# of valid cases	220
a. 8 cells (50.0%) with expected counts lower than 5. The expected minimal count is .05.
Symmetric measures
		Value	Asymptotic standard error a	Approx. Tb	Approx. significance
Interval	Pearson´s R	0.282829	0.0571869	4.35368	.000c
Ordinal	Spearman´s Correlation	0.289962	0.05837	4.47343	.000c
# of valid cases		220
a. The null hypothesis is not assumed.
b. Use of the asymptotic standard error that assumes the null hypothesis.
c. Is based on the normal approximation
Teaching anxiety and preparedness * CONTAINATION
Cross Tables
			CONTAINATION				Total
			ABSENT	MILD	Teaching Teaching modeRATE	SEVERE
Teaching anxiety and preparedness	1	Counts	6	5	2	1	14
		% of Teaching anxiety and preparedness	0.428571	0.357143	0.142857	0.0714286	1
	2	Counts	27	47	45	19	138
		% of Teaching anxiety and preparedness	0.195652	0.34058	0.326087	0.137681	1
	3	Counts	5	22	24	13	64
		% of Teaching anxiety and preparedness	0.078125	0.34375	0.375	0.203125	1
	4	Counts	0	0	1	0	1
		% of Teaching anxiety and preparedness	0	0	1	0	1
Total		Counts	38	74	72	33	217
		% of Teaching anxiety and preparedness	0.175115	0.341014	0.331797	0.152074	1
Chi-squared tests
	Value	df	Asymptotic significance (bilateral)
Pearson´s Chi-squared	14.696a	9	0.0996413
Verisimilitude	14.7362	9	0.0984429
Linear association	9.9383	1	0.00161875
# of valid cases	217
a. 8 cells (50.0%) with expected counts lower than 5. The expected minimal count is .15.
Symmetric measures
		Value	Asymptotic standard error a	Approx. Tb	Approx. significance
Interval	Pearson´s R	0.214501	0.0631463	3.22015	.001c
Ordinal	Spearman´s Correlation	0.206964	0.064185	3.10185	.002c
# of valid cases		217
a. The null hypothesis is not assumed.
b. Use of the asymptotic standard error that assumes the null hypothesis.
c. Is based on the normal approximation
Teaching anxiety and preparedness * FOBAP
Tabla cruzada
			FOBAP				Total
			ABSENT	MILD	Teaching Teaching modeRATE	SEVERE
Teaching Anxiety and Preparedness	1	Recuento	8	3	2	1	14
		% dentro de RDOCENTE	0.571	0.214	0.143	0.071	1
	2	Recuento	62	46	23	9	140
		% dentro de RDOCENTE	0.443	0.329	0.164	0.064	1
	3	Recuento	20	27	14	4	65
		% dentro de RDOCENTE	0.308	0.415	0.215	0.062	1
	4	Recuento	0	0	1	0	1
		% dentro de RDOCENTE	0	0	1	0	1
Total		Recuento	90	76	40	14	220
		% dentro de RDOCENTE	0.409	0.345	0.182	0.064	1
Pruebas de chi-cuadrado
	Valor	df	Significación asintótica (bilateral)
Chi-cuadrado de Pearson	9.934a	9	0.356
Razón de verosimilitud	8.937	9	0.443
Asociación lineal por lineal	3.001	1	0.083
N de casos válidos	220
a. 8 casillas (50.0%) han esperado un recuento menor que 5. El recuento mínimo esperado es .06.
Medidas simétricas
		Valor	Error estándar asintóticoa	T aproximadab	Significación aproximada
Intervalo por intervalo	R de Pearson	0.117	0.067	1.74	.083c
Ordinal por ordinal	Correlación de Spearman	0.134	0.067	1.992	.048c
N de casos válidos		220
a. No se presupone la hipótesis nula.
b. Utilización del error estándar asintótico que presupone la hipótesis nula.
c. Se basa en aproximación normal.
