# Supplementary material for: Teaching Anxiety, Stress and Resilience during the COVID-19 Pandemic: Evaluating the Vulnerability of Academic Professionals in Mexico through the Adapted COVID-19 Stress Scales
Source: Preprints.org preprint supplement (doi:10.20944/preprints202101.0406.v1), 2021-01-20
Supplement: Supplementary file 4 [file Table S11.xlsx]

## Sheet: Supplemental Table 11
Summary of Cases
	Cases
	Valid		Lost		Total
	N	Percentage	N	Percentage	N	Percentage
FOBAP * DANGER	220	1	0	0	220	1
FOBAP * XENOPHOBIA	220	1	0	0	220	1
FOBAP * TRAUMATIC STRESS	220	1	0	0	220	1
FOBAP * COMPULSIVE CHECKING	220	1	0	0	220	1
FOBAP * SOCIAL ECONOMICAL	220	1	0	0	220	1
FOBAP * CONTAINATION	217	0.986364	3	0.0136364	220	1
FOBAP * DANGER
Cross Tables
			DANGER				Total
			ABSENT	MILD	Teaching Teaching modeRATE	SEVERE
FOBAP	1.00		17	43	28	2	90
		% of FOBAP	0.188889	0.477778	0.311111	0.0222222	1
	2.00	Counts	4	21	39	12	76
		% of FOBAP	0.0526316	0.276316	0.513158	0.157895	1
	3.00	Counts	0	6	20	14	40
		% of FOBAP	0	0.15	0.5	0.35	1
	4.00	Counts	0	0	6	8	14
		% of FOBAP	0	0	0.428571	0.571429	1
Total		Counts	21	70	93	36	220
		% of FOBAP	0.0954545	0.318182	0.422727	0.163636	1
Chi-squared tests
	Value	df	Asymptotic significance (bilateral)
Pearson´s Chi-squared	68.900a	9	2.50144e-11
Verisimilitude	75.7394	9	1.12899e-12
Linear association	60.7885	1	6.35466e-15
# of valid cases	220
a. 4 cells (25.0%) with expected counts lower than 5. The expected minimal count is 1.34.
Symmetric measures
		Value	Asymptotic standard error a	Approx. Tb	Approx. significance
Interval	Pearson´s R	0.526852	0.0433244	9.15209	.000c
Ordinal	Spearman´s Correlation	0.532403	0.0477021	9.28639	.000c
# of valid cases		220
a. The null hypothesis is not assumed.
b. Use of the asymptotic standard error that assumes the null hypothesis.
c. Is based on the normal approximation
FOBAP * XENOPHOBIA
Cross Tables
			XENOPHOBIA				Total
			ABSENT	MILD	Teaching Teaching modeRATE	SEVERE
FOBAP	1.00	Counts	36	41	10	3	90
		% of FOBAP	0.4	0.455556	0.111111	0.0333333	1
	2.00	Counts	9	35	28	4	76
		% of FOBAP	0.118421	0.460526	0.368421	0.0526316	1
	3.00	Counts	2	13	23	2	40
		% of FOBAP	0.05	0.325	0.575	0.05	1
	4.00	Counts	0	3	5	6	14
		% of FOBAP	0	0.214286	0.357143	0.428571	1
Total		Counts	47	92	66	15	220
		% of FOBAP	0.213636	0.418182	0.3	0.0681818	1
Chi-squared tests
	Value	df	Asymptotic significance (bilateral)
Pearson´s Chi-squared	79.571a	9	1.96668e-13
Verisimilitude	69.6977	9	1.74534e-11
Linear association	51.7459	1	6.31682e-13
# of valid cases	220
a. 4 cells (25.0%) with expected counts lower than 5. The expected minimal count is .95.
Symmetric measures
		Value	Asymptotic standard error a	Approx. Tb	Approx. significance
Interval	Pearson´s R	0.486089	0.0556869	8.21255	.000c
Ordinal	Spearman´s Correlation	0.48967	0.0538952	8.29204	.000c
# of valid cases		220
a. The null hypothesis is not assumed.
b. Use of the asymptotic standard error that assumes the null hypothesis.
c. Is based on the normal approximation
FOBAP * TRAUMATIC STRESS
Cross Tables
			TRAUMATIC STRESS				Total
			ABSENT	MILD	Teaching Teaching modeRATE	SEVERE
FOBAP	1.00	Counts	77	12	1	0	90
		% of FOBAP	0.855556	0.133333	0.0111111	0	1
	2.00	Counts	51	19	5	1	76
		% of FOBAP	0.671053	0.25	0.0657895	0.0131579	1
	3.00	Counts	13	14	9	4	40
		% of FOBAP	0.325	0.35	0.225	0.1	1
	4.00	Counts	3	4	3	4	14
		% of FOBAP	0.214286	0.285714	0.214286	0.285714	1
Total		Counts	144	49	18	9	220
		% of FOBAP	0.654545	0.222727	0.0818182	0.0409091	1
Chi-squared tests
	Value	df	Asymptotic significance (bilateral)
Pearson´s Chi-squared	70.811a	9	1.05582e-11
Verisimilitude	63.8467	9	2.41705e-10
Linear association	59.6574	1	1.12894e-14
# of valid cases	220
a. 7 cells (43.8%) with expected counts lower than 5. The expected minimal count is .57.
Symmetric measures
		Value	Asymptotic standard error a	Approx. Tb	Approx. significance
Interval	Pearson´s R	0.521927	0.0544315	9.0343	.000c
Ordinal	Spearman´s Correlation	0.481276	0.0562307	8.10655	.000c
# of valid cases		220
a. The null hypothesis is not assumed.
b. Use of the asymptotic standard error that assumes the null hypothesis.
c. Is based on the normal approximation
FOBAP * COMPULSIVE CHECKING
Cross Tables
			COMPULSIVE CHECKING				Total
			ABSENT	MILD	Teaching Teaching modeRATE	SEVERE
FOBAP	1.00	Counts	64	23	2	1	90
		% of FOBAP	0.711111	0.255556	0.0222222	0.0111111	1
	2.00	Counts	23	36	12	5	76
		% of FOBAP	0.302632	0.473684	0.157895	0.0657895	1
	3.00	Counts	6	18	13	3	40
		% of FOBAP	0.15	0.45	0.325	0.075	1
	4.00	Counts	2	5	5	2	14
		% of FOBAP	0.142857	0.357143	0.357143	0.142857	1
Total		Counts	95	82	32	11	220
		% of FOBAP	0.431818	0.372727	0.145455	0.05	1
Chi-squared tests
	Value	df	Asymptotic significance (bilateral)
Pearson´s Chi-squared	63.973a	9	2.284e-10
Verisimilitude	67.345	9	5.03677e-11
Linear association	50.1262	1	1.44173e-12
# of valid cases	220
a. 5 cells (31.3%) with expected counts lower than 5. The expected minimal count is .70.
Symmetric measures
		Value	Asymptotic standard error a	Approx. Tb	Approx. significance
Interval	Pearson´s R	0.478421	0.0551669	8.04413	.000c
Ordinal	Spearman´s Correlation	0.515055	0.0521471	8.872	.000c
# of valid cases		220
a. The null hypothesis is not assumed.
b. Use of the asymptotic standard error that assumes the null hypothesis.
c. Is based on the normal approximation
FOBAP * SOCIAL ECONOMICAL
Cross Tables
			SOCIAL ECONOMICAL				Total
			ABSENT	MILD	Teaching Teaching modeRATE	SEVERE
FOBAP	1.00	Counts	37	39	13	1	90
		% of FOBAP	0.411111	0.433333	0.144444	0.0111111	1
	2.00	Counts	8	44	21	3	76
		% of FOBAP	0.105263	0.578947	0.276316	0.0394737	1
	3.00	Counts	1	20	18	1	40
		% of FOBAP	0.025	0.5	0.45	0.025	1
	4.00	Counts	0	2	7	5	14
		% of FOBAP	0	0.142857	0.5	0.357143	1
Total		Counts	46	105	59	10	220
		% of FOBAP	0.209091	0.477273	0.268182	0.0454545	1
Chi-squared tests
	Value	df	Asymptotic significance (bilateral)
Pearson´s Chi-squared	81.808a	9	7.0619e-14
Verisimilitude	69.5753	9	1.84441e-11
Linear association	52.1602	1	5.11532e-13
# of valid cases	220
a. 6 cells (37.5%) with expected counts lower than 5. The expected minimal count is .64.
Symmetric measures
		Value	Asymptotic standard error a	Approx. Tb	Approx. significance
Interval	Pearson´s R	0.488031	0.0542012	8.25559	.000c
Ordinal	Spearman´s Correlation	0.471703	0.0546486	7.89856	.000c
# of valid cases		220
a. The null hypothesis is not assumed.
b. Use of the asymptotic standard error that assumes the null hypothesis.
c. Is based on the normal approximation
FOBAP * CONTAINATION
Cross Tables
			CONTAINATION				Total
			ABSENT	MILD	Teaching Teaching modeRATE	SEVERE
FOBAP	1.00	Counts	27	39	15	9	90
		% of FOBAP	0.3	0.433333	0.166667	0.1	1
	2.00	Counts	8	22	35	11	76
		% of FOBAP	0.105263	0.289474	0.460526	0.144737	1
	3.00	Counts	2	11	19	7	39
		% of FOBAP	0.0512821	0.282051	0.487179	0.179487	1
	4.00	Counts	1	2	3	6	12
		% of FOBAP	0.0833333	0.166667	0.25	0.5	1
Total		Counts	38	74	72	33	217
		% of FOBAP	0.175115	0.341014	0.331797	0.152074	1
Chi-squared tests
	Value	df	Asymptotic significance (bilateral)
Pearson´s Chi-squared	44.083a	9	1.3626e-06
Verisimilitude	42.1277	9	3.11453e-06
Linear association	27.1925	1	1.84174e-07
# of valid cases	217
a. 4 cells (25.0%) with expected counts lower than 5. The expected minimal count is 1.82.
Symmetric measures
		Value	Asymptotic standard error a	Approx. Tb	Approx. significance
Interval	Pearson´s R	0.354811	0.0635963	5.5646	.000c
Ordinal	Spearman´s Correlation	0.369752	0.0621877	5.83517	.000c
# of valid cases		217
a. The null hypothesis is not assumed.
b. Use of the asymptotic standard error that assumes the null hypothesis.
c. Is based on the normal approximation
Summary of Cases
	Cases
	Valid		Lost		Total
	N	Percentage	N	Percentage	N	Percentage
TOTAL SECTIONS * FOBAP	220	1	0	0	220	1
TOTAL SECTIONS * Teaching anxiety and preparedness	220	1	0	0	220	1
TOTAL SECTIONS * RESILIENCE	220	1	0	0	220	1
