# Supplementary material for: Teaching Anxiety, Stress and Resilience during the COVID-19 Pandemic: Evaluating the Vulnerability of Academic Professionals in Mexico through the Adapted COVID-19 Stress Scales
Source: Preprints.org preprint supplement (doi:10.20944/preprints202101.0406.v1), 2021-01-20
Supplement: Supplementary file 6 [file Table S3.xlsx]

## Sheet: Supplemental Table 3
ACADEMIC DEGREE * DANGER										Academic Degree (Bachelor)
Cross Tables										Danger
			DANGER				Total				Counts	N esperada	Residue
			ABSCENT	MILD	Teaching Teaching modeRATE	SEVERE				Absent.00	17	38.75	-21.75
ACADEMIC DEGREE	Bachelor	Counts	17	46	67	25	155			Mild.00	46	38.75	7.25
		% of ACADEMIC DEGREE	0.109677	0.296774	0.432258	0.16129	1			Moderate.00	67	38.75	28.25
	Gradute	Counts	3	21	25	10	59			Severe.00	25	38.75	-13.75
		% of ACADEMIC DEGREE	0.0508475	0.355932	0.423729	0.169492	1			Total	155
	Highschool	Counts	1	3	1	1	6
		% of ACADEMIC DEGREE	0.166667	0.5	0.166667	0.166667	1			Xenophobia
Total		Counts	21	70	93	36	220				Counts	N esperada	Residue
		% of ACADEMIC DEGREE	0.0954545	0.318182	0.422727	0.163636	1			Absent.00	35	38.75	-3.75
										Mild.00	60	38.75	21.25
Pruebas de chi-cuadrado										Moderate.00	51	38.75	12.25
	Value	df	Asymptotic significance (bilateral)							Severe.00	9	38.75	-29.75
Pearson´s Chi-squared	3.970a	6	0.680738							Total	155
Verisimilitude	4.3333	6	0.631669
Linear association	0.00497417	1	0.943774							Traumatic Stress
# of valid cases	220										Counts	N esperada	Residue
a. 4 cells (33.3%) with expected counts less than 5. The minimum count expected is.57.										Absent.00	99	38.75	60.25
										Mild.00	38	38.75	-0.75
Symetric measures										Moderate.00	14	38.75	-24.75
		Value	asymptotic standard error	approx. Tb	approx. significance					Severe.00	4	38.75	-34.75
Interval	Pearson´s R	-0.00476582	0.0689086	-0.0703674	.944c					Total	155
Ordinal	Spearman correlation	-0.00163297	0.0673916	-0.0241106	.981c
# of valid cases		220								Compulsive Checking
a. Null hypothesis is not asumed											Counts	N esperada	Residue
b. Use of the asymptotic standard error that assumes the null hypothesis.										Absent.00	68	38.75	29.25
c. It is based on normal approximation.										Mild.00	59	38.75	20.25
										Moderate.00	21	38.75	-17.75
										Severe.00	7	38.75	-31.75
ACADEMIC DEGREE * XENOPHOBIA										Total	155
Cross Tables										Contamination
			XENOPHOBIA				Total				Counts	N esperada	Residue
			ABSCENT	MILD	Teaching Teaching modeRATE	SEVERE				Absent.00	35	38.75	-3.75
ACADEMIC DEGREE	Bachelor	Counts	35	60	51	9	155			Mild.00	67	38.75	28.25
		% of ACADEMIC DEGREE	0.225806	0.387097	0.329032	0.0580645	1			Moderate.00	47	38.75	8.25
	Gradute	Counts	11	29	13	6	59			Severe.00	6	38.75	-32.75
		% of ACADEMIC DEGREE	0.186441	0.491525	0.220339	0.101695	1			Total	155
	Highschool	Counts	1	3	2	0	6
		% of ACADEMIC DEGREE	0.166667	0.5	0.333333	0	1			Social Economical
Total		Counts	47	92	66	15	220				Counts	N esperada	Residue
		% of ACADEMIC DEGREE	0.213636	0.418182	0.3	0.0681818	1			Absent.00	26	38.5	-12.5
										Mild.00	48	38.5	9.5
Pruebas de chi-cuadrado										Moderate.00	55	38.5	16.5
	Value	df	Asymptotic significance (bilateral)							Severe.00	25	38.5	-13.5
Pearson´s Chi-squared	4.906a	6	0.555896							Total	154
Verisimilitude	5.28778	6	0.507468
Linear association	0.000780987	1	0.977705							FOBAP
# of valid cases	220										Counts	N esperada	Residue
a. 5 cells (41.7%) with expected counts less than 5. The minimum count expected is.41.										Absent.00	60	38.75	21.25
										Mild.00	57	38.75	18.25
Symetric measures										Moderate.00	30	38.75	-8.75
		Value	asymptotic standard error	approx. Tb	approx. significance					Severe.00	8	38.75	-30.75
Interval	Pearson´s R	0.00188843	0.0644448	0.0278823	.978c					Total	155
Ordinal	Spearman correlation	-0.00661445	0.0660645	-0.0976633	.922c
# of valid cases		220								Teaching Anxeity and Preparedness
a. Null hypothesis is not asumed											Counts	N esperada	Residue
b. Use of the asymptotic standard error that assumes the null hypothesis.										Absent.00	11	38.75	-27.75
c. It is based on normal approximation.										Mild.00	104	38.75	65.25
										Moderate.00	39	38.75	0.25
										Severe.00	1	38.75	-37.75
ACADEMIC DEGREE * TRAUMATIC STRESS										Total	155
Cross Tables										Resilience
			TRAUMATIC STRESS				Total				Counts	N esperada	Residue
			ABSCENT	MILD	Teaching Teaching modeRATE	SEVERE				Absent.00	7	31	-24
ACADEMIC DEGREE	Bachelor	Counts	99	38	14	4	155			Mild.00	1	31	-30
		% of ACADEMIC DEGREE	0.63871	0.245161	0.0903226	0.0258065	1			Moderate.00	18	31	-13
	Gradute	Counts	41	9	4	5	59			Severe.00	48	31	17
		% of ACADEMIC DEGREE	0.694915	0.152542	0.0677966	0.0847458	1			Very High.00	81	31	50
	Highschool	Counts	4	2	0	0	6			Total	155
		% of ACADEMIC DEGREE	0.666667	0.333333	0	0	1
Total		Counts	144	49	18	9	220			Total Sections
		% of ACADEMIC DEGREE	0.654545	0.222727	0.0818182	0.0409091	1				Counts	N esperada	Residue
										Absent.00	27	38.75	-11.75
Pruebas de chi-cuadrado										Mild.00	74	38.75	35.25
	Value	df	Asymptotic significance (bilateral)							Moderate.00	51	38.75	12.25
Pearson´s Chi-squared	6.843a	6	0.3356							Severe.00	3	38.75	-35.75
Verisimilitude	7.16063	6	0.306248							Total	155
Linear association	0.000531875	1	0.9816
# of valid cases	220									Estadísticos de prueba
a. 6 cells (50.0%) with expected counts less than 5. The minimum count expected is.25.											Danger	Xenophobia	Traumatic Stress	Compulsive Checking	Contamination	Social Economical	FOBAP	Teaching Anxeity and Preparedness	Resilience	Total Sections
										Chi-cuadrado	39.039a	38.729a	140.665a	66.806a	50.394a	18.208b	46.626a	166.523a	143.032c	72.484a
Symetric measures										gl	3	3	3	3	3	3	3	3	4	3
		Value	asymptotic standard error	approx. Tb	approx. significance					Sig. asintótica	1.7032e-08	1.98091e-08	2.71754e-30	2.06003e-14	6.58692e-11	0.000398508	4.17465e-10	7.16709e-36	6.32957e-30	1.25389e-15
Interval	Pearson´s R	-0.00155841	0.0659747	-0.0230097	.982c					a. 0 cells (0.0% ) has an expected frequency count lower than 5. The minimal expected cell count is 38.8.
Ordinal	Spearman correlation	-0.0327714	0.0675662	-0.484124	.629c					b. 0 cells (0.0% ) has an expected frequency count lower than 5. The minimal expected cell count is 38.5
# of valid cases		220								c. 0 cells (0.0% ) has an expected frequency count lower than 5. The minimal expected cell count is 31
a. Null hypothesis is not asumed
b. Use of the asymptotic standard error that assumes the null hypothesis.										Academic Degree (Gradute)
c. It is based on normal approximation.
										Danger
ACADEMIC DEGREE * COMPULSIVE CHECKING											Counts	N esperada	Residue
										Absent.00	3	14.75	-11.75
Cross Tables										Mild.00	21	14.75	6.25
			COMPULSIVE CHECKING				Total			Moderate.00	25	14.75	10.25
			ABSCENT	MILD	Teaching Teaching modeRATE	SEVERE				Severe.00	10	14.75	-4.75
ACADEMIC DEGREE	Bachelor	Counts	68	59	21	7	155			Total	59
		% of ACADEMIC DEGREE	0.43871	0.380645	0.135484	0.0451613	1
	Gradute	Counts	25	20	10	4	59			Xenophobia
		% of ACADEMIC DEGREE	0.423729	0.338983	0.169492	0.0677966	1				Counts	N esperada	Residue
	Highschool	Counts	2	3	1	0	6			Absent.00	11	14.75	-3.75
		% of ACADEMIC DEGREE	0.333333	0.5	0.166667	0	1			Mild.00	29	14.75	14.25
Total		Counts	95	82	32	11	220			Moderate.00	13	14.75	-1.75
		% of ACADEMIC DEGREE	0.431818	0.372727	0.145455	0.05	1			Severe.00	6	14.75	-8.75
										Total	59
Pruebas de chi-cuadrado
	Value	df	Asymptotic significance (bilateral)							Traumatic Stress
Pearson´s Chi-squared	1.733a	6	0.942546								Counts	N esperada	Residue
Verisimilitude	1.97899	6	0.92162							Absent.00	41	14.75	26.25
Linear association	0.399557	1	0.527318							Mild.00	9	14.75	-5.75
# of valid cases	220									Moderate.00	4	14.75	-10.75
a. 5 cells (41.7%) with expected counts less than 5. The minimum count expected is.30.										Severe.00	5	14.75	-9.75
										Total	59
Symetric measures
		Value	asymptotic standard error	approx. Tb	approx. significance					Compulsive Checking
Interval	Pearson´s R	0.0427137	0.0657247	0.631237	.529c						Counts	N esperada	Residue
Ordinal	Spearman correlation	0.0412156	0.0679314	0.609058	.543c					Absent.00	25	14.75	10.25
# of valid cases		220								Mild.00	20	14.75	5.25
a. Null hypothesis is not asumed										Moderate.00	10	14.75	-4.75
b. Use of the asymptotic standard error that assumes the null hypothesis.										Severe.00	4	14.75	-10.75
c. It is based on normal approximation.										Total	59
										Contamination
ACADEMIC DEGREE * SOCIAL ECONOMICAL											Counts	N esperada	Residue
										Absent.00	9	14.75	-5.75
Cross Tables										Mild.00	35	14.75	20.25
			SOCIAL ECONOMICAL				Total			Moderate.00	11	14.75	-3.75
			ABSCENT	MILD	Teaching Teaching modeRATE	SEVERE				Severe.00	4	14.75	-10.75
ACADEMIC DEGREE	Bachelor	Counts	35	67	47	6	155			Total	59
		% of ACADEMIC DEGREE	0.225806	0.432258	0.303226	0.0387097	1
	Gradute	Counts	9	35	11	4	59			Social Economical
		% of ACADEMIC DEGREE	0.152542	0.59322	0.186441	0.0677966	1				Counts	N esperada	Residue
	Highschool	Counts	2	3	1	0	6			Absent.00	10	14.25	-4.25
		% of ACADEMIC DEGREE	0.333333	0.5	0.166667	0	1			Mild.00	23	14.25	8.75
Total		Counts	46	105	59	10	220			Moderate.00	16	14.25	1.75
		% of ACADEMIC DEGREE	0.209091	0.477273	0.268182	0.0454545	1			Severe.00	8	14.25	-6.25
										Total	57
Pruebas de chi-cuadrado
	Value	df	Asymptotic significance (bilateral)							FOBAP
Pearson´s Chi-squared	7.365a	6	0.28841								Counts	N esperada	Residue
Verisimilitude	7.66688	6	0.263538							Absent.00	27	14.75	12.25
Linear association	0.182758	1	0.669014							Mild.00	17	14.75	2.25
# of valid cases	220									Moderate.00	9	14.75	-5.75
a. 5 cells (41.7%) with expected counts less than 5. The minimum count expected is.27.										Severe.00	6	14.75	-8.75
										Total	59
Symetric measures
		Value	asymptotic standard error	approx. Tb	approx. significance					Teaching Anxeity and Preparedness
Interval	Pearson´s R	-0.0288879	0.0652454	-0.426703	.670c						Counts	N esperada	Residue
Ordinal	Spearman correlation	-0.0277705	0.0650748	-0.410184	.682c					Absent.00	1	19.6667	-18.6667
# of valid cases		220								Mild.00	34	19.6667	14.3333
a. Null hypothesis is not asumed										Moderate.00	24	19.6667	4.33333
b. Use of the asymptotic standard error that assumes the null hypothesis.										Total	59
c. It is based on normal approximation.
										Resilience
											Counts	N esperada	Residue
ACADEMIC DEGREE * CONTAINATION										Absent.00	2	11.8	-9.8
										Mild.00	3	11.8	-8.8
Cross Tables										Moderate.00	3	11.8	-8.8
			CONTAINATION				Total			Severe.00	16	11.8	4.2
			ABSCENT	MILD	Teaching Teaching modeRATE	SEVERE				Very High.00	35	11.8	23.2
ACADEMIC DEGREE	Bachelor	Counts	26	48	55	25	154			Total	59
		% of ACADEMIC DEGREE	0.168831	0.311688	0.357143	0.162338	1
	Gradute	Counts	10	23	16	8	57			Total Sections
		% of ACADEMIC DEGREE	0.175439	0.403509	0.280702	0.140351	1				Counts	N esperada	Residue
	Highschool	Counts	2	3	1	0	6			Absent.00	8	14.75	-6.75
		% of ACADEMIC DEGREE	0.333333	0.5	0.166667	0	1			Mild.00	34	14.75	19.25
Total		Counts	38	74	72	33	217			Moderate.00	12	14.75	-2.75
		% of ACADEMIC DEGREE	0.175115	0.341014	0.331797	0.152074	1			Severe.00	5	14.75	-9.75
										Total	59
Pruebas de chi-cuadrado
	Value	df	Asymptotic significance (bilateral)							Estadísticos de prueba
Pearson´s Chi-squared	4.689a	6	0.584302								Danger	Xenophobia	Traumatic Stress	Compulsive Checking	Contamination	Social Economical	FOBAP	Teaching Anxeity and Preparedness	Resilience	Total Sections
Verisimilitude	5.46685	6	0.485472							Chi-cuadrado	20.661a	20.119a	63.237a	18.356a	38.831a	9.596b	17.949a	29.119c	68.373d	35.169a
Linear association	2.59806	1	0.106995							gl	3	3	3	3	3	3	3	2	4	3
# of valid cases	217									Sig. asintótica	0.000123795	0.000160398	1.19491e-13	0.000371417	1.88525e-08	0.0223267	0.000450599	4.75299e-07	5.00487e-14	1.12183e-07
a. 4 cells (33.3%) with expected counts less than 5. The minimum count expected is.91.										a. 0 cells (0.0% ) has an expected frequency count lower than 5. The minimal expected cell count is 14.8
										b. 0 cells (0.0% ) has an expected frequency count lower than 5. The minimal expected cell count is 14.3
Symetric measures										c. 0 cells (0.0% ) has an expected frequency count lower than 5. The minimal expected cell count is 19.7.
		Value	asymptotic standard error	approx. Tb	approx. significance					d. 0 cells (0.0% ) has an expected frequency count lower than 5. The minimal expected cell count is 11.8.
Interval	Pearson´s R	-0.109672	0.0647433	-1.61787	.107c
Ordinal	Spearman correlation	-0.0998502	0.0665364	-1.47144	.143c					Academic Degree (Highschool)
# of valid cases		217
a. Null hypothesis is not asumed										Danger
b. Use of the asymptotic standard error that assumes the null hypothesis.											Counts	N esperada	Residue
c. It is based on normal approximation.										Mild.00	3	1.66667	1.33333
										Moderate.00	1	1.66667	-0.666667
										Severe.00	1	1.66667	-0.666667
ACADEMIC DEGREE * FOBAP										Total	5
Cross Tables										Xenophobia
			FOBAP				Total				Counts	N esperada	Residue
			ABSCENT	MILD	Teaching Teaching modeRATE	SEVERE				Mild.00	3	2.5	0.5
ACADEMIC DEGREE	Bachelor	Counts	60	57	30	8	155			Moderate.00	2	2.5	-0.5
		% of ACADEMIC DEGREE	0.387097	0.367742	0.193548	0.0516129	1			Total	5
	Gradute	Counts	27	17	9	6	59
		% of ACADEMIC DEGREE	0.457627	0.288136	0.152542	0.101695	1			Traumatic Stress
	Highschool	Counts	3	2	1	0	6				Counts	N esperada	Residue
		% of ACADEMIC DEGREE	0.5	0.333333	0.166667	0	1			Absent.00	3	2.5	0.5
Total		Counts	90	76	40	14	220			Mild.00	2	2.5	-0.5
		% of ACADEMIC DEGREE	0.409091	0.345455	0.181818	0.0636364	1			Total	5
Pruebas de chi-cuadrado										Compulsive Checking
	Value	df	Asymptotic significance (bilateral)								Counts	N esperada	Residue
Pearson´s Chi-squared	3.911a	6	0.688766							Absent.00	1	1.66667	-0.666667
Verisimilitude	4.13459	6	0.658468							Mild.00	3	1.66667	1.33333
Linear association	0.16677	1	0.682998							Moderate.00	1	1.66667	-0.666667
# of valid cases	220									Total	5
a. 5 cells (41.7%) with expected counts less than 5. The minimum count expected is.38.
										Contamination
Symetric measures											Counts	N esperada	Residue
		Value	asymptotic standard error	approx. Tb	approx. significance					Absent.00	1	1.66667	-0.666667
Interval	Pearson´s R	-0.0275954	0.0672875	-0.407597	.684c					Mild.00	3	1.66667	1.33333
Ordinal	Spearman correlation	-0.0412055	0.0689537	-0.60891	.543c					Moderate.00	1	1.66667	-0.666667
# of valid cases		220								Total	5
a. Null hypothesis is not asumed
b. Use of the asymptotic standard error that assumes the null hypothesis.										Social Economical
c. It is based on normal approximation.											Counts	N esperada	Residue
										Absent.00	1	1.66667	-0.666667
										Mild.00	3	1.66667	1.33333
ACADEMIC DEGREE * Teaching anxiety and preparedness										Moderate.00	1	1.66667	-0.666667
										Total	5
Cross Tables
			Teaching anxiety and preparedness				Total			FOBAP
			ABSCENT	MILD	Teaching Teaching modeRATE	SEVERE					Counts	N esperada	Residue
ACADEMIC DEGREE	Bachelor	Counts	11	104	39	1	155			Absent.00	2	1.66667	0.333333
		% of ACADEMIC DEGREE	0.0709677	0.670968	0.251613	0.00645161	1			Mild.00	2	1.66667	0.333333
	Gradute	Counts	1	34	24	0	59			Moderate.00	1	1.66667	-0.666667
		% of ACADEMIC DEGREE	0.0169492	0.576271	0.40678	0	1			Total	5
	Highschool	Counts	2	2	2	0	6
		% of ACADEMIC DEGREE	0.333333	0.333333	0.333333	0	1			Teaching Anxeity and Preparedness
Total		Counts	14	140	65	1	220				Counts	N esperada	Residue
		% of ACADEMIC DEGREE	0.0636364	0.636364	0.295455	0.00454545	1			Absent.00	1	1.66667	-0.666667
										Mild.00	2	1.66667	0.333333
Pruebas de chi-cuadrado										Moderate.00	2	1.66667	0.333333
	Value	df	Asymptotic significance (bilateral)							Total	5
Pearson´s Chi-squared	14.434a	6	0.0251487
Verisimilitude	12.0617	6	0.0606075							Resilience
Linear association	1.80372	1	0.179264								Counts	N esperada	Residue
# of valid cases	220									Severe.00	3	2.5	0.5
a. 7 cells (58.3%) with expected counts less than 5. The minimum count expected is.03.										Very High.00	2	2.5	-0.5
										Total	5
Symetric measures
		Value	asymptotic standard error	approx. Tb	approx. significance					Total Sections
Interval	Pearson´s R	0.0907533	0.0784104	1.34551	.180c						Counts	N esperada	Residue
Ordinal	Spearman correlation	0.127734	0.0706106	1.90155	.059c					Absent.00	1	1.66667	-0.666667
# of valid cases		220								Mild.00	2	1.66667	0.333333
a. Null hypothesis is not asumed										Moderate.00	2	1.66667	0.333333
b. Use of the asymptotic standard error that assumes the null hypothesis.										Total	5
c. It is based on normal approximation.
										Estadísticos de prueba
											Danger	Xenophobia	Traumatic Stress	Compulsive Checking	Contamination	Social Economical	FOBAP	Teaching Anxeity and Preparedness	Resilience	Total Sections
ACADEMIC DEGREE * RESILIENCE										Chi-cuadrado	1.600a	.200b	.200b	1.600a	1.600a	1.600a	.400a	.400a	.200b	.400a
										gl	2	1	1	2	2	2	2	2	1	2
Cross Tables										Sig. asintótica	0.449329	0.654721	0.654721	0.449329	0.449329	0.449329	0.818731	0.818731	0.654721	0.818731
			RESILIENCE					Total		a. 3 cells (100.0%) has an expected frequency count lower than 5. The minimal expected cel count is 1.7.
			Very low	Low	Normal	High	Very High			b. 2 cells (100.0%) has an expected frequency count lower than 5. The minimal expected cel count is 2.5.
ACADEMIC DEGREE	Bachelor	Counts	7	1	18	48	81	155
		% of ACADEMIC DEGREE	0.0451613	0.00645161	0.116129	0.309677	0.522581	1
	Gradute	Counts	2	3	3	16	35	59
		% of ACADEMIC DEGREE	0.0338983	0.0508475	0.0508475	0.271186	0.59322	1
	Highschool	Counts	1	0	0	3	2	6
		% of ACADEMIC DEGREE	0.166667	0	0	0.5	0.333333	1
Total		Counts	10	4	21	67	118	220
		% of ACADEMIC DEGREE	0.0454545	0.0181818	0.0954545	0.304545	0.536364	1
Pruebas de chi-cuadrado
	Value	df	Asymptotic significance (bilateral)
Pearson´s Chi-squared	11.208a	8	0.19021
Verisimilitude	10.511	8	0.230974
Linear association	0.0172315	1	0.895563
# of valid cases	220
a. 8 cells (53.3%) with expected counts less than 5. The minimum count expected is.11.
Symetric measures
		Value	asymptotic standard error	approx. Tb	approx. significance
Interval	Pearson´s R	-0.00887032	0.0751409	-0.130974	.896c
Ordinal	Spearman correlation	0.0326388	0.0675439	0.482163	.630c
# of valid cases		220
a. Null hypothesis is not asumed
b. Use of the asymptotic standard error that assumes the null hypothesis.
c. It is based on normal approximation.
ACADEMIC DEGREE * TOTALSECTIONS
Cross Tables
			TOTALSECTIONS				Total
			ABSCENT	MILD	Teaching Teaching modeRATE	SEVERE
ACADEMIC DEGREE	Bachelor	Counts	27	74	51	3	155
		% of ACADEMIC DEGREE	0.174194	0.477419	0.329032	0.0193548	1
	Gradute	Counts	8	34	12	5	59
		% of ACADEMIC DEGREE	0.135593	0.576271	0.20339	0.0847458	1
	Highschool	Counts	2	2	2	0	6
		% of ACADEMIC DEGREE	0.333333	0.333333	0.333333	0	1
Total		Counts	37	110	65	8	220
		% of ACADEMIC DEGREE	0.168182	0.5	0.295455	0.0363636	1
Pruebas de chi-cuadrado
	Value	df	Asymptotic significance (bilateral)
Pearson´s Chi-squared	10.119a	6	0.119718
Verisimilitude	9.55698	6	0.144591
Linear association	0.00116446	1	0.972778
# of valid cases	220
a. 5 cells (41.7%) with expected counts less than 5. The minimum count expected is.22.
Symetric measures
		Value	asymptotic standard error	approx. Tb	approx. significance
Interval	Pearson´s R	-0.0023059	0.0706615	-0.0340462	.973c
Ordinal	Spearman correlation	-0.0139265	0.068104	-0.205642	.837c
# of valid cases		220
a. Null hypothesis is not asumed
b. Use of the asymptotic standard error that assumes the null hypothesis.
c. It is based on normal approximation.
