# Supplementary material for: Teaching Anxiety, Stress and Resilience during the COVID-19 Pandemic: Evaluating the Vulnerability of Academic Professionals in Mexico through the Adapted COVID-19 Stress Scales
Source: Preprints.org preprint supplement (doi:10.20944/preprints202101.0406.v1), 2021-01-20
Supplement: Supplementary file 7 [file Table S4.xlsx]

## Sheet: Supplemental Table 4
HOUSEHOLD OCCUPANTS * DANGER
Cross Tables
			DANGER				Total
			ABSCENT	MILD	Teaching Teaching modeRATE	SEVERE
HOUSEHOLD OCCUPANTS	1	Counts	4	7	5	1	17
		% of HOUSEHOLD OCCUPANTS	0.235294	0.411765	0.294118	0.0588235	1
	2	Counts	9	17	17	5	48
		% of HOUSEHOLD OCCUPANTS	0.1875	0.354167	0.354167	0.104167	1
	3	Counts	3	15	22	8	48
		% of HOUSEHOLD OCCUPANTS	0.0625	0.3125	0.458333	0.166667	1
	4	Counts	2	14	32	12	60
		% of HOUSEHOLD OCCUPANTS	0.0333333	0.233333	0.533333	0.2	1
	4+	Counts	3	16	16	10	45
		% of HOUSEHOLD OCCUPANTS	0.0666667	0.355556	0.355556	0.222222	1
Total		Counts	21	69	92	36	218
		% of HOUSEHOLD OCCUPANTS	0.0963303	0.316514	0.422018	0.165138	1
Pruebas de chi-cuadrado
	Value	df	Asymptotic significance (bilateral)
Pearson´s Chi-squared	20.376a	12	0.0603071
Verisimilitude	19.9605	12	0.0678359
Linear association	10.4908	1	0.0011997
# of valid cases	218
a. 5 cells (25.0%) with expected counts less than 5. The minimum count expected is1.64.
Symetric measures
		Value	asymptotic standard error	approx. Tb	approx. significance
Interval	Pearson´s R	0.219874	0.0669915	3.31254	.001c
Ordinal	Spearman correlation	0.203014	0.0679338	3.04714	.003c
# of valid cases		218
a. Null hypothesis is not asumed
b. Use of the asymptotic standard error that assumes the null hypothesis.
c. It is based on normal approximation.
HOUSEHOLD OCCUPANTS * XENOPHOBIA
Cross Tables
			XENOPHOBIA				Total
			ABSCENT	MILD	Teaching Teaching modeRATE	SEVERE
HOUSEHOLD OCCUPANTS	1	Counts	4	6	7	0	17
		% of HOUSEHOLD OCCUPANTS	0.235294	0.352941	0.411765	0	1
	2	Counts	13	18	13	4	48
		% of HOUSEHOLD OCCUPANTS	0.270833	0.375	0.270833	0.0833333	1
	3	Counts	10	23	13	2	48
		% of HOUSEHOLD OCCUPANTS	0.208333	0.479167	0.270833	0.0416667	1
	4	Counts	13	22	20	5	60
		% of HOUSEHOLD OCCUPANTS	0.216667	0.366667	0.333333	0.0833333	1
	4+	Counts	7	22	12	4	45
		% of HOUSEHOLD OCCUPANTS	0.155556	0.488889	0.266667	0.0888889	1
Total		Counts	47	91	65	15	218
		% of HOUSEHOLD OCCUPANTS	0.215596	0.417431	0.298165	0.0688073	1
Pruebas de chi-cuadrado
	Value	df	Asymptotic significance (bilateral)
Pearson´s Chi-squared	6.863a	12	0.86651
Verisimilitude	8.01284	12	0.784126
Linear association	0.790065	1	0.37408
# of valid cases	218
a. 6 cells (30.0%) with expected counts less than 5. The minimum count expected is1.17.
Symetric measures
		Value	asymptotic standard error	approx. Tb	approx. significance
Interval	Pearson´s R	0.0603395	0.0664491	0.888425	.375c
Ordinal	Spearman correlation	0.0557421	0.0672217	0.820514	.413c
# of valid cases		218
a. Null hypothesis is not asumed
b. Use of the asymptotic standard error that assumes the null hypothesis.
c. It is based on normal approximation.
HOUSEHOLD OCCUPANTS * TRAUMATIC STRESS
Cross Tables
			TRAUMATIC STRESS				Total
			ABSCENT	MILD	Teaching Teaching modeRATE	SEVERE
HOUSEHOLD OCCUPANTS	1	Counts	12	4	1	0	17
		% of HOUSEHOLD OCCUPANTS	0.705882	0.235294	0.0588235	0	1
	2	Counts	36	11	1	0	48
		% of HOUSEHOLD OCCUPANTS	0.75	0.229167	0.0208333	0	1
	3	Counts	31	12	4	1	48
		% of HOUSEHOLD OCCUPANTS	0.645833	0.25	0.0833333	0.0208333	1
	4	Counts	36	14	5	5	60
		% of HOUSEHOLD OCCUPANTS	0.6	0.233333	0.0833333	0.0833333	1
	4+	Counts	28	8	6	3	45
		% of HOUSEHOLD OCCUPANTS	0.622222	0.177778	0.133333	0.0666667	1
Total		Counts	143	49	17	9	218
		% of HOUSEHOLD OCCUPANTS	0.655963	0.224771	0.0779817	0.0412844	1
Pruebas de chi-cuadrado
	Value	df	Asymptotic significance (bilateral)
Pearson´s Chi-squared	12.033a	12	0.442995
Verisimilitude	14.6613	12	0.260483
Linear association	6.46094	1	0.0110271
# of valid cases	218
a. 11 cells (55.0%) with expected counts less than 5. The minimum count expected is.70.
Symetric measures
		Value	asymptotic standard error	approx. Tb	approx. significance
Interval	Pearson´s R	0.172551	0.0589735	2.57459	.011c
Ordinal	Spearman correlation	0.132584	0.065504	1.96594	.051c
# of valid cases		218
a. Null hypothesis is not asumed
b. Use of the asymptotic standard error that assumes the null hypothesis.
c. It is based on normal approximation.
HOUSEHOLD OCCUPANTS * COMPULSIVE CHECKING
Cross Tables
			COMPULSIVE CHECKING				Total
			ABSCENT	MILD	Teaching Teaching modeRATE	SEVERE
HOUSEHOLD OCCUPANTS	1	Counts	9	6	2	0	17
		% of HOUSEHOLD OCCUPANTS	0.529412	0.352941	0.117647	0	1
	2	Counts	23	18	6	1	48
		% of HOUSEHOLD OCCUPANTS	0.479167	0.375	0.125	0.0208333	1
	3	Counts	20	17	9	2	48
		% of HOUSEHOLD OCCUPANTS	0.416667	0.354167	0.1875	0.0416667	1
	4	Counts	29	19	8	4	60
		% of HOUSEHOLD OCCUPANTS	0.483333	0.316667	0.133333	0.0666667	1
	4+	Counts	13	21	7	4	45
		% of HOUSEHOLD OCCUPANTS	0.288889	0.466667	0.155556	0.0888889	1
Total		Counts	94	81	32	11	218
		% of HOUSEHOLD OCCUPANTS	0.431193	0.37156	0.146789	0.0504587	1
Pruebas de chi-cuadrado
	Value	df	Asymptotic significance (bilateral)
Pearson´s Chi-squared	9.079a	12	0.696162
Verisimilitude	10.0552	12	0.611119
Linear association	4.203	1	0.0403524
# of valid cases	218
a. 6 cells (30.0%) with expected counts less than 5. The minimum count expected is.86.
Symetric measures
		Value	asymptotic standard error	approx. Tb	approx. significance
Interval	Pearson´s R	0.139171	0.0626724	2.06549	.040c
Ordinal	Spearman correlation	0.128491	0.0650426	1.9042	.058c
# of valid cases		218
a. Null hypothesis is not asumed
b. Use of the asymptotic standard error that assumes the null hypothesis.
c. It is based on normal approximation.
HOUSEHOLD OCCUPANTS * SOCIAL ECONOMICAL
Cross Tables
			SOCIAL ECONOMICAL				Total
			ABSCENT	MILD	Teaching Teaching modeRATE	SEVERE
HOUSEHOLD OCCUPANTS	1	Counts	5	10	2	0	17
		% of HOUSEHOLD OCCUPANTS	0.294118	0.588235	0.117647	0	1
	2	Counts	12	21	14	1	48
		% of HOUSEHOLD OCCUPANTS	0.25	0.4375	0.291667	0.0208333	1
	3	Counts	9	23	13	3	48
		% of HOUSEHOLD OCCUPANTS	0.1875	0.479167	0.270833	0.0625	1
	4	Counts	9	32	17	2	60
		% of HOUSEHOLD OCCUPANTS	0.15	0.533333	0.283333	0.0333333	1
	4+	Counts	10	19	12	4	45
		% of HOUSEHOLD OCCUPANTS	0.222222	0.422222	0.266667	0.0888889	1
Total		Counts	45	105	58	10	218
		% of HOUSEHOLD OCCUPANTS	0.206422	0.481651	0.266055	0.0458716	1
Pruebas de chi-cuadrado
	Value	df	Asymptotic significance (bilateral)
Pearson´s Chi-squared	8.740a	12	0.724982
Verisimilitude	9.63523	12	0.647927
Linear association	2.63953	1	0.104234
# of valid cases	218
a. 7 cells (35.0%) with expected counts less than 5. The minimum count expected is.78.
Symetric measures
		Value	asymptotic standard error	approx. Tb	approx. significance
Interval	Pearson´s R	0.110289	0.0666912	1.63087	.104c
Ordinal	Spearman correlation	0.0950503	0.0682868	1.4033	.162c
# of valid cases		218
a. Null hypothesis is not asumed
b. Use of the asymptotic standard error that assumes the null hypothesis.
c. It is based on normal approximation.
HOUSEHOLD OCCUPANTS * CONTAINATION
Cross Tables
			CONTAINATION				Total
			ABSCENT	MILD	Teaching Teaching modeRATE	SEVERE
HOUSEHOLD OCCUPANTS	1	Counts	3	8	4	2	17
		% of HOUSEHOLD OCCUPANTS	0.176471	0.470588	0.235294	0.117647	1
	2	Counts	13	14	12	9	48
		% of HOUSEHOLD OCCUPANTS	0.270833	0.291667	0.25	0.1875	1
	3	Counts	10	17	16	5	48
		% of HOUSEHOLD OCCUPANTS	0.208333	0.354167	0.333333	0.104167	1
	4	Counts	6	21	23	7	57
		% of HOUSEHOLD OCCUPANTS	0.105263	0.368421	0.403509	0.122807	1
	4+	Counts	5	14	17	9	45
		% of HOUSEHOLD OCCUPANTS	0.111111	0.311111	0.377778	0.2	1
Total		Counts	37	74	72	32	215
		% of HOUSEHOLD OCCUPANTS	0.172093	0.344186	0.334884	0.148837	1
Pruebas de chi-cuadrado
	Value	df	Asymptotic significance (bilateral)
Pearson´s Chi-squared	11.840a	12	0.458587
Verisimilitude	11.8182	12	0.460387
Linear association	3.89296	1	0.048489
# of valid cases	215
a. 2 cells (10.0%) with expected counts less than 5. The minimum count expected is2.53.
Symetric measures
		Value	asymptotic standard error	approx. Tb	approx. significance
Interval	Pearson´s R	0.134875	0.0680881	1.98659	.048c
Ordinal	Spearman correlation	0.139875	0.0683475	2.06167	.040c
# of valid cases		215
a. Null hypothesis is not asumed
b. Use of the asymptotic standard error that assumes the null hypothesis.
c. It is based on normal approximation.
HOUSEHOLD OCCUPANTS * FOBAP
Cross Tables
			FOBAP				Total
			ABSCENT	MILD	Teaching Teaching modeRATE	SEVERE
HOUSEHOLD OCCUPANTS	1	Counts	12	3	2	0	17
		% of HOUSEHOLD OCCUPANTS	0.705882	0.176471	0.117647	0	1
	2	Counts	20	19	7	2	48
		% of HOUSEHOLD OCCUPANTS	0.416667	0.395833	0.145833	0.0416667	1
	3	Counts	18	19	9	2	48
		% of HOUSEHOLD OCCUPANTS	0.375	0.395833	0.1875	0.0416667	1
	4	Counts	24	19	13	4	60
		% of HOUSEHOLD OCCUPANTS	0.4	0.316667	0.216667	0.0666667	1
	4+	Counts	15	16	9	5	45
		% of HOUSEHOLD OCCUPANTS	0.333333	0.355556	0.2	0.111111	1
Total		Counts	89	76	40	13	218
		% of HOUSEHOLD OCCUPANTS	0.408257	0.348624	0.183486	0.059633	1
Pruebas de chi-cuadrado
	Value	df	Asymptotic significance (bilateral)
Pearson´s Chi-squared	11.483a	12	0.488036
Verisimilitude	11.8943	12	0.454202
Linear association	6.15353	1	0.013115
# of valid cases	218
a. 6 cells (30.0%) with expected counts less than 5. The minimum count expected is1.01.
Symetric measures
		Value	asymptotic standard error	approx. Tb	approx. significance
Interval	Pearson´s R	0.168396	0.0648743	2.51076	.013c
Ordinal	Spearman correlation	0.153479	0.066667	2.28272	.023c
# of valid cases		218
a. Null hypothesis is not asumed
b. Use of the asymptotic standard error that assumes the null hypothesis.
c. It is based on normal approximation.
HOUSEHOLD OCCUPANTS * Teaching anxiety and preparedness
Cross Tables
			Teaching anxiety and preparedness				Total
			ABSCENT	MILD	Teaching Teaching modeRATE	SEVERE
HOUSEHOLD OCCUPANTS	1	Counts	4	8	4	1	17
		% of HOUSEHOLD OCCUPANTS	0.235294	0.470588	0.235294	0.0588235	1
	2	Counts	2	30	16	0	48
		% of HOUSEHOLD OCCUPANTS	0.0416667	0.625	0.333333	0	1
	3	Counts	3	31	14	0	48
		% of HOUSEHOLD OCCUPANTS	0.0625	0.645833	0.291667	0	1
	4	Counts	2	37	21	0	60
		% of HOUSEHOLD OCCUPANTS	0.0333333	0.616667	0.35	0	1
	4+	Counts	2	33	10	0	45
		% of HOUSEHOLD OCCUPANTS	0.0444444	0.733333	0.222222	0	1
Total		Counts	13	139	65	1	218
		% of HOUSEHOLD OCCUPANTS	0.059633	0.637615	0.298165	0.00458716	1
Pruebas de chi-cuadrado
	Value	df	Asymptotic significance (bilateral)
Pearson´s Chi-squared	25.048a	12	0.0145984
Verisimilitude	14.832	12	0.250751
Linear association	0.000229751	1	0.987906
# of valid cases	218
a. 10 cells (50.0%) with expected counts less than 5. The minimum count expected is.08.
Symetric measures
		Value	asymptotic standard error	approx. Tb	approx. significance
Interval	Pearson´s R	0.00102896	0.0748978	0.0151226	.988c
Ordinal	Spearman correlation	-0.00832833	0.0701056	-0.122405	.903c
# of valid cases		218
a. Null hypothesis is not asumed
b. Use of the asymptotic standard error that assumes the null hypothesis.
c. It is based on normal approximation.
HOUSEHOLD OCCUPANTS * RESILIENCE
Cross Tables
			RESILIENCE					Total
			Very low	Low	Normal	High	Very High
HOUSEHOLD OCCUPANTS	1	Counts	1	0	2	5	9	17
		% of HOUSEHOLD OCCUPANTS	0.0588235	0	0.117647	0.294118	0.529412	1
	2	Counts	5	0	5	14	24	48
		% of HOUSEHOLD OCCUPANTS	0.104167	0	0.104167	0.291667	0.5	1
	3	Counts	2	2	7	17	20	48
		% of HOUSEHOLD OCCUPANTS	0.0416667	0.0416667	0.145833	0.354167	0.416667	1
	4	Counts	2	1	4	15	38	60
		% of HOUSEHOLD OCCUPANTS	0.0333333	0.0166667	0.0666667	0.25	0.633333	1
	4+	Counts	0	1	3	15	26	45
		% of HOUSEHOLD OCCUPANTS	0	0.0222222	0.0666667	0.333333	0.577778	1
Total		Counts	10	4	21	66	117	218
		% of HOUSEHOLD OCCUPANTS	0.0458716	0.0183486	0.0963303	0.302752	0.536697	1
Pruebas de chi-cuadrado
	Value	df	Asymptotic significance (bilateral)
Pearson´s Chi-squared	14.588a	16	0.554991
Verisimilitude	16.5315	16	0.416519
Linear association	4.07511	1	0.0435195
# of valid cases	218
a. 14 cells (56.0%) with expected counts less than 5. The minimum count expected is.31.
Symetric measures
		Value	asymptotic standard error	approx. Tb	approx. significance
Interval	Pearson´s R	0.137038	0.0620831	2.03321	.043c
Ordinal	Spearman correlation	0.117403	0.0660035	1.73749	.084c
# of valid cases		218
a. Null hypothesis is not asumed
b. Use of the asymptotic standard error that assumes the null hypothesis.
c. It is based on normal approximation.
HOUSEHOLD OCCUPANTS * TOTALSECTIONS
Cross Tables
			TOTALSECTIONS				Total
			ABSCENT	MILD	Teaching Teaching modeRATE	SEVERE
HOUSEHOLD OCCUPANTS	1	Counts	5	9	3	0	17
		% of HOUSEHOLD OCCUPANTS	0.294118	0.529412	0.176471	0	1
	2	Counts	10	25	13	0	48
		% of HOUSEHOLD OCCUPANTS	0.208333	0.520833	0.270833	0	1
	3	Counts	10	21	16	1	48
		% of HOUSEHOLD OCCUPANTS	0.208333	0.4375	0.333333	0.0208333	1
	4	Counts	6	31	20	3	60
		% of HOUSEHOLD OCCUPANTS	0.1	0.516667	0.333333	0.05	1
	4+	Counts	5	24	12	4	45
		% of HOUSEHOLD OCCUPANTS	0.111111	0.533333	0.266667	0.0888889	1
Total		Counts	36	110	64	8	218
		% of HOUSEHOLD OCCUPANTS	0.165138	0.504587	0.293578	0.0366972	1
Pruebas de chi-cuadrado
	Value	df	Asymptotic significance (bilateral)
Pearson´s Chi-squared	13.615a	12	0.325997
Verisimilitude	15.155	12	0.233069
Linear association	7.31481	1	0.00683885
# of valid cases	218
a. 7 cells (35.0%) with expected counts less than 5. The minimum count expected is.62.
Symetric measures
		Value	asymptotic standard error	approx. Tb	approx. significance
Interval	Pearson´s R	0.1836	0.063461	2.74501	.007c
Ordinal	Spearman correlation	0.162805	0.065083	2.42509	.016c
# of valid cases		218
a. Null hypothesis is not asumed
b. Use of the asymptotic standard error that assumes the null hypothesis.
c. It is based on normal approximation.
Chi-squared testing
1 person
DANGER
	Counts	N expected	Residue
ABSENT	3	4	-1
MILD	7	4	3
MODERATE	5	4	1
SEVERE	1	4	-3
Total	16
XENOPHOBIA
	Counts	N expected	Residue
ABSENT	3	5.33333	-2.33333
MILD	6	5.33333	0.666667
MODERATE	7	5.33333	1.66667
Total	16
TRAUMATIC STRESS
	Counts	N expected	Residue
ABSENT	11	5.33333	5.66667
MILD	4	5.33333	-1.33333
MODERATE	1	5.33333	-4.33333
Total	16
COMPULSIVE CHECKING
	Counts	N expected	Residue
ABSENT	8	5.33333	2.66667
MILD	6	5.33333	0.666667
MODERATE	2	5.33333	-3.33333
Total	16
CONTAMINATION
	Counts	N expected	Residue
ABSENT	4	5.33333	-1.33333
MILD	10	5.33333	4.66667
MODERATE	2	5.33333	-3.33333
Total	16
SOCIAL ECONOMICAL
	Counts	N expected	Residue
ABSENT	2	4	-2
MILD	8	4	4
MODERATE	4	4	0
SEVERE	2	4	-2
Total	16
FOBAP
	Counts	N expected	Residue
ABSENT	11	5.33333	5.66667
MILD	3	5.33333	-2.33333
MODERATE	2	5.33333	-3.33333
Total	16
TEACHING ANXIETY AND PREPAREDNESS
	Counts	N expected	Residue
ABSENT	3	4	-1
MILD	8	4	4
MODERATE	4	4	0
SEVERE	1	4	-3
Total	16
RESILIENCE
	Counts	N expected	Residue
NORMAL	2	5.33333	-3.33333
HIGH	5	5.33333	-0.333333
VERY HIGH	9	5.33333	3.66667
Total	16
TOTAL SECTIONS
	Counts	N expected	Residue
ABSENT	4	5.33333	-1.33333
MILD	9	5.33333	3.66667
MODERATE	3	5.33333	-2.33333
Total	16
Estadísticos de prueba
	DANGER	XENOPHOBIA	TRAUMATIC STRESS	COMPULSIVE CHECKING	CONTAMINATION	SOCIAL ECONOMICAL	FOBAP	TEACHING ANXIETY AND PREPAREDNESS	RESILIENCE	TOTAL SECTIONS
Chi-cuadrado	5.000a	1.625b	9.875b	3.500b	6.500b	6.000a	9.125b	6.500a	4.625b	3.875b
gl	3	2	2	2	2	3	2	3	2	2
Sig. asintótica	0.171797	0.443747	0.00717251	0.173774	0.0387742	0.11161	0.0104359	0.0896625	0.0990134	0.144064
a. 4 casillas (100.0%) han esperado frecuencias menores que 5. La frecuencia mínima de casilla esperada es 4.0.
b.0 cells (0.0%) have an expected count lower than 5. The minimal expected frequency cell count is 5.3.
2 PERSON
DANGER
	Counts	N expected	Residue
ABSENT	9	12	-3
MILD	17	12	5
MODERATE	17	12	5
SEVERE	5	12	-7
Total	48
XENOPHOBIA
	Counts	N expected	Residue
ABSENT	13	12	1
MILD	18	12	6
MODERATE	13	12	1
SEVERE	4	12	-8
Total	48
TRAUMATIC STRESS
	Counts	N expected	Residue
ABSENT	36	16	20
MILD	11	16	-5
MODERATE	1	16	-15
Total	48
COMPULSIVE CHECKING
	Counts	N expected	Residue
ABSENT	23	12	11
MILD	18	12	6
MODERATE	6	12	-6
SEVERE	1	12	-11
Total	48
CONTAMINATION
	Counts	N expected	Residue
ABSENT	12	12	0
MILD	21	12	9
MODERATE	14	12	2
SEVERE	1	12	-11
Total	48
SOCIAL ECONOMICAL
	Counts	N expected	Residue
ABSENT	13	12	1
MILD	14	12	2
MODERATE	12	12	0
SEVERE	9	12	-3
Total	48
FOBAP
	Counts	N expected	Residue
ABSENT	20	12	8
MILD	19	12	7
MODERATE	7	12	-5
SEVERE	2	12	-10
Total	48
TEACHING ANXIETY AND PREPAREDNESS
	Counts	N expected	Residue
ABSENT	2	16	-14
MILD	30	16	14
MODERATE	16	16	0
Total	48
RESILIENCE
	Counts	N expected	Residue
VERY LOW	5	12	-7
NORMAL	5	12	-7
HIGH	14	12	2
VERY HIGH	24	12	12
Total	48
TOTAL SECTIONS
	Counts	N expected	Residue
ABSENT	10	16	-6
MILD	25	16	9
MODERATE	13	16	-3
Total	48
Estadísticos de prueba
	DANGER	XENOPHOBIA	TRAUMATIC STRESS	COMPULSIVE CHECKING	CONTAMINATION	SOCIAL ECONOMICAL	FOBAP	TEACHING ANXIETY AND PREPAREDNESS	RESILIENCE	TOTAL SECTIONS
Chi-cuadrado	9.000a	8.500a	40.625b	26.167a	17.167a	1.167a	19.833a	24.500b	20.500a	7.875b
gl	3	3	2	3	3	3	3	2	3	2
Sig. asintótica	0.0292909	0.0367331	1.50797e-09	8.80098e-06	0.000653094	0.76101	0.000183791	4.78512e-06	0.000133695	0.0194969
a.0 cells (0.0%) have an expected count lower than 5. The minimal expected frequency cell count is 12.0.
b.0 cells (0.0%) have an expected count lower than 5. The minimal expected frequency cell count is 16.0.
3 PERSONS
DANGER
	Counts	N expected	Residue
ABSENT	3	12	-9
MILD	15	12	3
MODERATE	22	12	10
SEVERE	8	12	-4
Total	48
XENOPHOBIA
	Counts	N expected	Residue
ABSENT	10	12	-2
MILD	23	12	11
MODERATE	13	12	1
SEVERE	2	12	-10
Total	48
TRAUMATIC STRESS
	Counts	N expected	Residue
ABSENT	31	12	19
MILD	12	12	0
MODERATE	4	12	-8
SEVERE	1	12	-11
Total	48
COMPULSIVE CHECKING
	Counts	N expected	Residue
ABSENT	20	12	8
MILD	17	12	5
MODERATE	9	12	-3
SEVERE	2	12	-10
Total	48
CONTAMINATION
	Counts	N expected	Residue
ABSENT	9	12	-3
MILD	23	12	11
MODERATE	13	12	1
SEVERE	3	12	-9
Total	48
SOCIAL ECONOMICAL
	Counts	N expected	Residue
ABSENT	10	12	-2
MILD	17	12	5
MODERATE	16	12	4
SEVERE	5	12	-7
Total	48
FOBAP
	Counts	N expected	Residue
ABSENT	18	12	6
MILD	19	12	7
MODERATE	9	12	-3
SEVERE	2	12	-10
Total	48
TEACHING ANXIETY AND PREPAREDNESS
	Counts	N expected	Residue
ABSENT	3	16	-13
MILD	31	16	15
MODERATE	14	16	-2
Total	48
RESILIENCE
	Counts	N expected	Residue
VERY LOW	2	9.6	-7.6
LOW	2	9.6	-7.6
NORMAL	7	9.6	-2.6
HIGH	17	9.6	7.4
VERY HIGH	20	9.6	10.4
Total	48
TOTAL SECTIONS
	Counts	N expected	Residue
ABSENT	10	12	-2
MILD	21	12	9
MODERATE	16	12	4
SEVERE	1	12	-11
Total	48
Estadísticos de prueba
	DANGER	XENOPHOBIA	TRAUMATIC STRESS	COMPULSIVE CHECKING	CONTAMINATION	SOCIAL ECONOMICAL	FOBAP	TEACHING ANXIETY AND PREPAREDNESS	RESILIENCE	TOTAL SECTIONS
Chi-cuadrado	17.167a	18.833a	45.500a	16.500a	17.667a	7.833a	16.167a	24.875b	29.708c	18.500a
gl	3	3	3	3	3	3	3	2	4	3
Sig. asintótica	0.000653094	0.000295972	7.24427e-10	0.000895395	0.000515253	0.0495848	0.00104816	3.967e-06	5.61127e-06	0.000346829
a.0 cells (0.0%) have an expected count lower than 5. The minimal expected frequency cell count is 12.0.
b.0 cells (0.0%) have an expected count lower than 5. The minimal expected frequency cell count is 16.0.
c.0 cells (0.0%) have an expected count lower than 5. The minimal expected frequency cell count is 9.6.
4 PERSONS
DANGER
	Counts	N expected	Residue
ABSENT	2	15	-13
MILD	14	15	-1
MODERATE	32	15	17
SEVERE	12	15	-3
Total	60
XENOPHOBIA
	Counts	N expected	Residue
ABSENT	13	15	-2
MILD	22	15	7
MODERATE	20	15	5
SEVERE	5	15	-10
Total	60
TRAUMATIC STRESS
	Counts	N expected	Residue
ABSENT	36	15	21
MILD	14	15	-1
MODERATE	5	15	-10
SEVERE	5	15	-10
Total	60
COMPULSIVE CHECKING
	Counts	N expected	Residue
ABSENT	29	15	14
MILD	19	15	4
MODERATE	8	15	-7
SEVERE	4	15	-11
Total	60
CONTAMINATION
	Counts	N expected	Residue
ABSENT	9	15	-6
MILD	32	15	17
MODERATE	17	15	2
SEVERE	2	15	-13
Total	60
SOCIAL ECONOMICAL
	Counts	N expected	Residue
ABSENT	6	14.25	-8.25
MILD	21	14.25	6.75
MODERATE	23	14.25	8.75
SEVERE	7	14.25	-7.25
Total	57
FOBAP
	Counts	N expected	Residue
ABSENT	24	15	9
MILD	19	15	4
MODERATE	13	15	-2
SEVERE	4	15	-11
Total	60
TEACHING ANXIETY AND PREPAREDNESS
	Counts	N expected	Residue
ABSENT	2	20	-18
MILD	37	20	17
MODERATE	21	20	1
Total	60
RESILIENCE
	Counts	N expected	Residue
VERY LOW	2	12	-10
LOW	1	12	-11
NORMAL	4	12	-8
HIGH	15	12	3
VERY HIGH	38	12	26
Total	60
TOTAL SECTIONS
	Counts	N expected	Residue
ABSENT	6	15	-9
MILD	31	15	16
MODERATE	20	15	5
SEVERE	3	15	-12
Total	60
Estadísticos de prueba
	DANGER	XENOPHOBIA	TRAUMATIC STRESS	COMPULSIVE CHECKING	CONTAMINATION	SOCIAL ECONOMICAL	FOBAP	TEACHING ANXIETY AND PREPAREDNESS	RESILIENCE	TOTAL SECTIONS
Chi-cuadrado	31.200a	11.867a	42.800a	25.467a	33.200a	17.035b	14.800a	30.700c	80.833d	33.733a
gl	3	3	3	3	3	3	3	2	4	3
Sig. asintótica	7.71486e-07	0.00785414	2.71377e-09	1.23326e-05	2.92251e-07	0.000695096	0.00199579	2.15566e-07	1.15995e-16	2.25535e-07
a.0 cells (0.0%) have an expected count lower than 5. The minimal expected frequency cell count is 15.0.
b.0 cells (0.0%) have an expected count lower than 5. The minimal expected frequency cell count is 14.3.
c.0 cells (0.0%) have an expected count lower than 5. The minimal expected frequency cell count is 20.0.
d.0 cells (0.0%) have an expected count lower than 5. The minimal expected frequency cell count is 12.0.
MORE THAN 4 PERSONS
DANGER
	Counts	N expected	Residue
ABSENT	3	11.25	-8.25
MILD	16	11.25	4.75
MODERATE	16	11.25	4.75
SEVERE	10	11.25	-1.25
Total	45
XENOPHOBIA
	Counts	N expected	Residue
ABSENT	7	11.25	-4.25
MILD	22	11.25	10.75
MODERATE	12	11.25	0.75
SEVERE	4	11.25	-7.25
Total	45
TRAUMATIC STRESS
	Counts	N expected	Residue
ABSENT	28	11.25	16.75
MILD	8	11.25	-3.25
MODERATE	6	11.25	-5.25
SEVERE	3	11.25	-8.25
Total	45
COMPULSIVE CHECKING
	Counts	N expected	Residue
ABSENT	13	11.25	1.75
MILD	21	11.25	9.75
MODERATE	7	11.25	-4.25
SEVERE	4	11.25	-7.25
Total	45
CONTAMINATION
	Counts	N expected	Residue
ABSENT	10	11.25	-1.25
MILD	19	11.25	7.75
MODERATE	12	11.25	0.75
SEVERE	4	11.25	-7.25
Total	45
SOCIAL ECONOMICAL
	Counts	N expected	Residue
ABSENT	5	11.25	-6.25
MILD	14	11.25	2.75
MODERATE	17	11.25	5.75
SEVERE	9	11.25	-2.25
Total	45
FOBAP
	Counts	N expected	Residue
ABSENT	15	11.25	3.75
MILD	16	11.25	4.75
MODERATE	9	11.25	-2.25
SEVERE	5	11.25	-6.25
Total	45
TEACHING ANXIETY AND PREPAREDNESS
	Counts	N expected	Residue
ABSENT	2	15	-13
MILD	33	15	18
MODERATE	10	15	-5
Total	45
RESILIENCE
	Counts	N expected	Residue
LOW	1	11.25	-10.25
NORMAL	3	11.25	-8.25
HIGH	15	11.25	3.75
VERY HIGH	26	11.25	14.75
Total	45
TOTAL SECTIONS
	Counts	N expected	Residue
ABSENT	5	11.25	-6.25
MILD	24	11.25	12.75
MODERATE	12	11.25	0.75
SEVERE	4	11.25	-7.25
Total	45
Estadísticos de prueba
	DANGER	XENOPHOBIA	TRAUMATIC STRESS	COMPULSIVE CHECKING	CONTAMINATION	SOCIAL ECONOMICAL	FOBAP	TEACHING ANXIETY AND PREPAREDNESS	RESILIENCE	TOTAL SECTIONS
Chi-cuadrado	10.200a	16.600a	34.378a	15.000a	10.200a	7.533a	7.178a	34.533b	35.978a	22.644a
gl	3	3	3	3	3	3	3	2	3	3
Sig. asintótica	0.0169404	0.000854037	1.64878e-07	0.00181665	0.0169404	0.0567081	0.0664422	3.1709e-08	7.56983e-08	4.78947e-05
a.0 cells (0.0%) have an expected count lower than 5. The minimal expected frequency cell count is 11.3.
b.0 cells (0.0%) have an expected count lower than 5. The minimal expected frequency cell count is 15.0.
