# Supplementary material for: Teaching Anxiety, Stress and Resilience during the COVID-19 Pandemic: Evaluating the Vulnerability of Academic Professionals in Mexico through the Adapted COVID-19 Stress Scales
Source: Preprints.org preprint supplement (doi:10.20944/preprints202101.0406.v1), 2021-01-20
Supplement: Supplementary file 8 [file Table S5.xlsx]

## Sheet: Supplemental Table 5
DISEASES
Chi-suqred tests
With a comorbidity
Danger
	Counts	N expected	Residue
Absent	4	11.75	-7.75
Mild	9	11.75	-2.75
Moderate	25	11.75	13.25
Severe	9	11.75	-2.75
Total	47
Xenophobia
	Counts	N expected	Residue
Absent	6	11.75	-5.75
Mild	19	11.75	7.25
Moderate	19	11.75	7.25
Severe	3	11.75	-8.75
Total	47
Traumatic stress
	Counts	N expected	Residue
Absent	30	11.75	18.25
Mild	13	11.75	1.25
Moderate	3	11.75	-8.75
Severe	1	11.75	-10.75
Total	47
Compulsive checking
	Counts	N expected	Residue
Absent	20	11.75	8.25
Mild	16	11.75	4.25
Moderate	8	11.75	-3.75
Severe	3	11.75	-8.75
Total	47
Contamination
	Counts	N expected	Residue
Absent	7	11.75	-4.75
Mild	26	11.75	14.25
Moderate	11	11.75	-0.75
Severe	3	11.75	-8.75
Total	47
Social Economical
	Counts	N expected	Residue
Absent	7	11.5	-4.5
Mild	11	11.5	-0.5
Moderate	22	11.5	10.5
Severe	6	11.5	-5.5
Total	46
FOBAP
	Counts	N expected	Residue
Absent	19	11.75	7.25
Mild	18	11.75	6.25
Moderate	8	11.75	-3.75
Severe	2	11.75	-9.75
Total	47
Teaching Anxeity and Preparedness
	Counts	N expected	Residue
Absent	3	11.75	-8.75
Mild	25	11.75	13.25
Moderate	18	11.75	6.25
Severe	1	11.75	-10.75
Total	47
Resilience
	Counts	N expected	Residue
Very Low	2	11.75	-9.75
Normal	6	11.75	-5.75
High	16	11.75	4.25
Very High	23	11.75	11.25
Total	47
Total Sections
	Counts	N expected	Residue
Absent	8	11.75	-3.75
Mild	20	11.75	8.25
Moderate	18	11.75	6.25
Severe	1	11.75	-10.75
Total	47
Estadísticos de prueba
	Danger	Xenophobia	Traumatic stress	Compulsive checking	Contamination	Social Economical	FOBAP	TAP	Resilience	Total sections
Chi-cuadrado	21.340a	18.277a	44.830a	15.043a	25.766a	14.000b	17.085a	34.617a	23.213a	20.149a
gl	3	3	3	3	3	3	3	3	3	3
Sig. asintótica	8.94559e-05	0.00038569	1.00564e-09	0.00178064	1.06764e-05	0.00290515	0.000678822	1.4677e-07	3.64622e-05	0.000158096
a. 0 Cells (0.0%)have an expected frequency lower than 5. the minimal expected frequency is 11.8.
a. 0 Cells (0.0%)have an expected frequency lower than 5. the minimal expected frequency is 11.5.
