# Supplementary material for: Teaching Anxiety, Stress and Resilience during the COVID-19 Pandemic: Evaluating the Vulnerability of Academic Professionals in Mexico through the Adapted COVID-19 Stress Scales
Source: Preprints.org preprint supplement (doi:10.20944/preprints202101.0406.v1), 2021-01-20
Supplement: Supplementary file 9 [file Table S6.xlsx]

## Sheet: Supplemental Table 6
TEACHING LEVELS
Chi-squared testing
ELEMENTARY SCHOOL
DANGER
	Counts	N expected	Residue
Absent	14	26.5	-12.5
Mild	40	26.5	13.5
Moderate	32	26.5	5.5
Severe	20	26.5	-6.5
Total	106
XENOPHOBIA
	Counts	N expected	Residue
Absent	27	26.5	0.5
Mild	39	26.5	12.5
Moderate	33	26.5	6.5
Severe	7	26.5	-19.5
Total	106
TRAUMATIC STRESS
	Counts	N expected	Residue
Absent	71	26.5	44.5
Mild	20	26.5	-6.5
Moderate	10	26.5	-16.5
Severe	5	26.5	-21.5
Total	106
COMPULSIVE CHECKING
	Counts	N expected	Residue
Absent	49	26.5	22.5
Mild	36	26.5	9.5
Moderate	15	26.5	-11.5
Severe	6	26.5	-20.5
Total	106
CONTAMINATION
	Counts	N expected	Residue
Absent	27	26.5	0.5
Mild	45	26.5	18.5
Moderate	30	26.5	3.5
Severe	4	26.5	-22.5
Total	106
SOCIAL ECONOMICAL
	Counts	N expected	Residue
Absent	19	26	-7
Mild	33	26	7
Moderate	35	26	9
Severe	17	26	-9
Total	104
FOBAP
	Counts	N expected	Residue
Absent	46	26.5	19.5
Mild	31	26.5	4.5
Moderate	21	26.5	-5.5
Severe	8	26.5	-18.5
Total	106
TEACHING ANXIETY AND PREPAREDNESS
	Counts	N expected	Residue
Absent	7	35.3333	-28.3333
Mild	71	35.3333	35.6667
Moderate	28	35.3333	-7.33333
Total	106
RESILIENCE
	Counts	N expected	Residue
Very low	5	21.2	-16.2
Low	1	21.2	-20.2
Normal	11	21.2	-10.2
High	31	21.2	9.8
Very High	58	21.2	36.8
Total	106
TOTAL SECTIONS
	Counts	N expected	Residue
Absent	22	26.5	-4.5
Mild	50	26.5	23.5
Moderate	29	26.5	2.5
Severe	5	26.5	-21.5
Total	106
Estadísticos de prueba
	DANGER	XENOPHOBIA	TRAUMATIC STRESS	COMPULSIVE CHECKING	CONTAMINATION	SOCIAL ECONOMICAL	FOBAP	TEACHING ANXIETY AND PREPAREDNESS	RESILIENCE	TOTAL SECTIONS
Chi-cuadrado	15.509a	21.849a	104.038a	43.358a	32.491a	10.000b	29.170a	60.245c	104.943d	39.283a
gl	3	3	3	3	3	3	3	2	4	3
Sig. asintótica	0.00142922	7.01225e-05	2.10448e-22	2.06534e-09	4.12458e-07	0.0185661	2.06277e-06	8.27757e-14	8.70873e-22	1.51184e-08
a. cells (0.0%) have an expected frequency count lower than 5. The minimal expected frequency count is 26.5.
b. cells (0.0%) have an expected frequency count lower than 5. The minimal expected frequency count is 26.0.
c. cells (0.0%) have an expected frequency count lower than 5. The minimal expected frequency count is 35.3.
d. cells (0.0%) have an expected frequency count lower than 5. The minimal expected frequency count is 21.2.
Junior Highschool
DANGER
	Counts	N expected	Residue
Absent	4	18.5	-14.5
Mild	28	18.5	9.5
Moderate	36	18.5	17.5
Severe	6	18.5	-12.5
Total	74
XENOPHOBIA
	Counts	N expected	Residue
Absent	14	18.5	-4.5
Mild	35	18.5	16.5
Moderate	22	18.5	3.5
Severe	3	18.5	-15.5
Total	74
TRAUMATIC STRESS
	Counts	N expected	Residue
Absent	51	18.5	32.5
Mild	19	18.5	0.5
Moderate	3	18.5	-15.5
Severe	1	18.5	-17.5
Total	74
COMPULSIVE CHECKING
	Counts	N expected	Residue
Absent	34	18.5	15.5
Mild	26	18.5	7.5
Moderate	12	18.5	-6.5
Severe	2	18.5	-16.5
Total	74
CONTAMINATION
	Counts	N expected	Residue
Absent	13	18.5	-5.5
Mild	43	18.5	24.5
Moderate	16	18.5	-2.5
Severe	2	18.5	-16.5
Total	74
SOCIAL ECONOMICAL
	Counts	N expected	Residue
Absent	12	18.25	-6.25
Mild	27	18.25	8.75
Moderate	26	18.25	7.75
Severe	8	18.25	-10.25
Total	73
FOBAP
	Counts	N expected	Residue
Absent	33	18.5	14.5
Mild	27	18.5	8.5
Moderate	11	18.5	-7.5
Severe	3	18.5	-15.5
Total	74
TEACHING ANXIETY AND PREPAREDNESS
	Counts	N expected	Residue
Absent	3	24.6667	-21.6667
Mild	47	24.6667	22.3333
Moderate	24	24.6667	-0.666667
Total	74
RESILIENCE
	Counts	N expected	Residue
Very low	1	14.8	-13.8
Low	2	14.8	-12.8
Normal	9	14.8	-5.8
High	23	14.8	8.2
Very High	39	14.8	24.2
Total	74
TOTAL SECTIONS
	Counts	N expected	Residue
Absent	9	18.5	-9.5
Mild	46	18.5	27.5
Moderate	18	18.5	-0.5
Severe	1	18.5	-17.5
Total	74
Estadísticos de prueba
	DANGER	XENOPHOBIA	TRAUMATIC STRESS	COMPULSIVE CHECKING	CONTAMINATION	SOCIAL ECONOMICAL	FOBAP	TEACHING ANXIETY AND PREPAREDNESS	RESILIENCE	TOTAL SECTIONS
Chi-cuadrado	41.243a	29.459a	86.649a	33.027a	49.135a	15.384b	31.297a	39.270c	70.324d	62.324a
gl	3	3	3	3	3	3	3	2	4	3
Sig. asintótica	5.80673e-09	1.79295e-06	1.14877e-18	3.17867e-07	1.22085e-10	0.00151655	7.35931e-07	2.96872e-09	1.93875e-14	1.87293e-13
a. cells (0.0%) have an expected frequency count lower than 5. The minimal expected frequency count is 18.5.
b. cells (0.0%) have an expected frequency count lower than 5. The minimal expected frequency count is 18.3.
c. cells (0.0%) have an expected frequency count lower than 5. The minimal expected frequency count is 24.7.
d. cells (0.0%) have an expected frequency count lower than 5. The minimal expected frequency count is 14.8.
HighSchool
DANGER
	Counts	N expected	Residue
Absent	3	17	-14
Mild	24	17	7
Moderate	32	17	15
Severe	9	17	-8
Total	68
XENOPHOBIA
	Counts	N expected	Residue
Absent	10	17	-7
Mild	34	17	17
Moderate	19	17	2
Severe	5	17	-12
Total	68
TRAUMATIC STRESS
	Counts	N expected	Residue
Absent	41	17	24
Mild	19	17	2
Moderate	4	17	-13
Severe	4	17	-13
Total	68
COMPULSIVE CHECKING
	Counts	N expected	Residue
Absent	28	17	11
Mild	25	17	8
Moderate	11	17	-6
Severe	4	17	-13
Total	68
CONTAMINATION
	Counts	N expected	Residue
Absent	10	17	-7
Mild	35	17	18
Moderate	21	17	4
Severe	2	17	-15
Total	68
SOCIAL ECONOMICAL
	Counts	N expected	Residue
Absent	11	16.5	-5.5
Mild	24	16.5	7.5
Moderate	20	16.5	3.5
Severe	11	16.5	-5.5
Total	66
FOBAP
	Counts	N expected	Residue
Absent	28	17	11
Mild	28	17	11
Moderate	10	17	-7
Severe	2	17	-15
Total	68
TEACHING ANXIETY AND PREPAREDNESS
	Counts	N expected	Residue
Absent	2	22.6667	-20.6667
Mild	40	22.6667	17.3333
Moderate	26	22.6667	3.33333
Total	68
RESILIENCE
	Counts	N expected	Residue
Very Low	3	13.6	-10.6
Low	2	13.6	-11.6
Normal	6	13.6	-7.6
High	20	13.6	6.4
Very High	37	13.6	23.4
Total	68
TOTAL SECTIONS
	Counts	N expected	Residue
Absent	6	17	-11
Mild	40	17	23
Moderate	18	17	1
Severe	4	17	-13
Total	68
Estadísticos de prueba
	DANGER	XENOPHOBIA	TRAUMATIC STRESS	COMPULSIVE CHECKING	CONTAMINATION	SOCIAL ECONOMICAL	FOBAP	TEACHING ANXIETY AND PREPAREDNESS	RESILIENCE	TOTAL SECTIONS
Chi-cuadrado	31.412a	28.588a	54.000a	22.941a	36.118a	7.818b	30.353a	32.588c	65.676d	48.235a
gl	3	3	3	3	3	3	3	2	4	3
Sig. asintótica	6.96189e-07	2.73301e-06	1.12206e-11	4.15393e-05	7.07152e-08	0.0499227	1.16317e-06	8.386e-08	1.85329e-13	1.89758e-10
a. cells (0.0%) have an expected frequency count lower than 5. The minimal expected frequency count is 17.0.
b. cells (0.0%) have an expected frequency count lower than 5. The minimal expected frequency count is 16.5.
c. cells (0.0%) have an expected frequency count lower than 5. The minimal expected frequency count is 22.7.
d. cells (0.0%) have an expected frequency count lower than 5. The minimal expected frequency count is 13.6.
BACHELOR
DANGER
	Counts	N expected	Residue
Absent	8	12.5	-4.5
Mild	15	12.5	2.5
Moderate	20	12.5	7.5
Severe	7	12.5	-5.5
Total	50
XENOPHOBIA
	Counts	N expected	Residue
Absent	10	12.5	-2.5
Mild	25	12.5	12.5
Moderate	12	12.5	-0.5
Severe	3	12.5	-9.5
Total	50
TRAUMATIC STRESS
	Counts	N expected	Residue
Absent	36	12.5	23.5
Mild	8	12.5	-4.5
Moderate	3	12.5	-9.5
Severe	3	12.5	-9.5
Total	50
COMPULSIVE CHECKING
	Counts	N expected	Residue
Absent	22	12.5	9.5
Mild	21	12.5	8.5
Moderate	5	12.5	-7.5
Severe	2	12.5	-10.5
Total	50
CONTAMINATION
	Counts	N expected	Residue
Absent	12	12.5	-0.5
Mild	22	12.5	9.5
Moderate	14	12.5	1.5
Severe	2	12.5	-10.5
Total	50
SOCIAL ECONOMICAL
	Counts	N expected	Residue
Absent	13	12.5	0.5
Mild	15	12.5	2.5
Moderate	17	12.5	4.5
Severe	5	12.5	-7.5
Total	50
FOBAP
	Counts	N expected	Residue
Absent	24	12.5	11.5
Mild	15	12.5	2.5
Moderate	8	12.5	-4.5
Severe	3	12.5	-9.5
Total	50
TEACHING ANXIETY AND PREPAREDNESS
	Counts	N expected	Residue
Absent	5	12.5	-7.5
Mild	31	12.5	18.5
Moderate	13	12.5	0.5
Severe	1	12.5	-11.5
Total	50
RESILIENCE
	Counts	N expected	Residue
Wry Low	3	12.5	-9.5
Nornal	6	12.5	-6.5
High	12	12.5	-0.5
Very High	29	12.5	16.5
Total	50
TOTAL SECTIONS
	Counts	N expected	Residue
Absent	10	12.5	-2.5
Mild	25	12.5	12.5
Moderate	13	12.5	0.5
Severe	2	12.5	-10.5
Total	50
Estadísticos de prueba
	DANGER	XENOPHOBIA	TRAUMATIC STRESS	COMPULSIVE CHECKING	CONTAMINATION	SOCIAL ECONOMICAL	FOBAP	TEACHING ANXIETY AND PREPAREDNESS	RESILIENCE	TOTAL SECTIONS
Chi-cuadrado	9.040a	20.240a	60.240a	26.320a	16.240a	6.640a	19.920a	42.480a	32.400a	21.840a
gl	3	3	3	3	3	3	3	3	3	3
Sig. asintótica	0.0287638	0.00015137	5.22361e-13	8.17366e-06	0.00101247	0.0843018	0.000176347	3.17324e-09	4.30997e-07	7.04273e-05
a. cells (0.0%) have an expected frequency count lower than 5. The minimal expected frequency count is 12.5.
Graduate
DANGER
	Counts	N expected	Residue
Mild	2	2	0
Moderate	3	2	1
Severe	1	2	-1
Total	6
XENOPHOBIA
	Counts	N expected	Residue
Absent	2	2	0
Mild	1	2	-1
Moderate	3	2	1
Total	6
TRAUMATIC STRESS
	Counts	N expected	Residue
Absent	4	2	2
Mild	1	2	-1
Severe	1	2	-1
Total	6
COMPULSIVE CHECKING
	Counts	N expected	Residue
Absent	4	2	2
Mild	1	2	-1
Severe	1	2	-1
Total	6
CONTAMINATION
	Counts	N expected	Residue
Absent	1	3	-2
Mild	5	3	2
Total	6
SOCIAL ECONOMICAL
	Counts	N expected	Residue
Absent	1	2	-1
Mild	3	2	1
Moderate	2	2	0
Total	6
FOBAP
	Counts	N expected	Residue
Absent	2	2	0
Mild	2	2	0
Moderate	2	2	0
Total	6
TEACHING ANXIETY AND PREPAREDNESS
	Counts	N expected	Residue
Mold	4	3	1
Moderate	2	3	-1
Total	6
RESILIENCE
	Counts	N expected	Residue
High	3	3	0
Very High	3	3	0
Total	6
TOTAL SECTIONS
	Counts	N expected	Residue
Absernt	1	2	-1
Mild	4	2	2
Moderate	1	2	-1
Total	6
Estadísticos de prueba
	DANGER	XENOPHOBIA	TRAUMATIC STRESS	COMPULSIVE CHECKING	CONTAMINATION	SOCIAL ECONOMICAL	FOBAP	TEACHING ANXIETY AND PREPAREDNESS	RESILIENCE	TOTAL SECTIONS
Chi-cuadrado	1.000a	1.000a	3.000a	3.000a	2.667b	1.000a	.000a	.667b	.000b	3.000a
gl	2	2	2	2	1	2	2	1	1	2
Sig. asintótica	0.606531	0.606531	0.22313	0.22313	0.10247	0.606531	1	0.414216	1	0.22313
a. 3 casillas (100.0%) han esperado frecuencias menores que 5. La frecuencia mínima de casilla esperada es 2.0.
b. 2 casillas (100.0%) han esperado frecuencias menores que 5. La frecuencia mínima de casilla esperada es 3.0.
