# Supplementary material for: Teaching Anxiety, Stress and Resilience during the COVID-19 Pandemic: Evaluating the Vulnerability of Academic Professionals in Mexico through the Adapted COVID-19 Stress Scales
Source: Preprints.org preprint supplement (doi:10.20944/preprints202101.0406.v1), 2021-01-20
Supplement: Supplementary file 10 [file Table S7.xlsx]

## Sheet: Supplemental Table 7
Teaching mode * DANGER
Cross Tables
			DANGER				Total
			ABSCENT	MILD	Teaching modeRATE	SEVERE
Teaching mode	On line	Counts	18	56	80	31	185
		% of Teaching mode	0.0972973	0.302703	0.432432	0.167568	1
	Mix	Counts	1	8	5	2	16
		% of Teaching mode	0.0625	0.5	0.3125	0.125	1
	Presential	Counts	0	3	2	1	6
		% of Teaching mode	0	0.5	0.333333	0.166667	1
	Does not apply	Counts	2	3	5	1	11
		% of Teaching mode	0.181818	0.272727	0.454545	0.0909091	1
Total		Counts	21	70	92	35	218
		% of Teaching mode	0.0963303	0.321101	0.422018	0.16055	1
Pruebas de chi-cuadrado
	Value	df	Asymptotic significance (bilateral)
Pearson´s Chi-squared	5.230a	9	0.813777
Verisimilitude	5.47298	9	0.791284
Linear association	0.786134	1	0.375272
# of valid cases	218
a. 10 cells (62.5%) with expected counts less than 5. The minimum count expected is.58.
Symetric measures
		Value	asymptotic standard error	approx. Tb	approx. significance
Interval	Pearson´s R	-0.0601892	0.0679934	-0.886203	.376c
Ordinal	Spearman correlation	-0.071599	0.0661581	-1.05499	.293c
# of valid cases		218
a. Null hypothesis is not asumed
b. Use of the asymptotic standard error that assumes the null hypothesis.
c. It is based on normal approximation.
Teaching mode * XENOPHOBIA
Cross Tables
			XENOPHOBIA				Total
			ABSCENT	MILD	Teaching modeRATE	SEVERE
Teaching mode	On line	Counts	40	77	57	11	185
		% of Teaching mode	0.216216	0.416216	0.308108	0.0594595	1
	Mix	Counts	3	7	4	2	16
		% of Teaching mode	0.1875	0.4375	0.25	0.125	1
	Presential	Counts	1	4	1	0	6
		% of Teaching mode	0.166667	0.666667	0.166667	0	1
	Does not apply	Counts	3	4	4	0	11
		% of Teaching mode	0.272727	0.363636	0.363636	0	1
Total		Counts	47	92	66	13	218
		% of Teaching mode	0.215596	0.422018	0.302752	0.059633	1
Pruebas de chi-cuadrado
	Value	df	Asymptotic significance (bilateral)
Pearson´s Chi-squared	4.082a	9	0.905913
Verisimilitude	4.76249	9	0.854502
Linear association	0.24098	1	0.623499
# of valid cases	218
a. 11 cells (68.8%) with expected counts less than 5. The minimum count expected is.36.
Symetric measures
		Value	asymptotic standard error	approx. Tb	approx. significance
Interval	Pearson´s R	-0.0333243	0.062922	-0.490037	.625c
Ordinal	Spearman correlation	-0.0177057	0.0663892	-0.260261	.795c
# of valid cases		218
a. Null hypothesis is not asumed
b. Use of the asymptotic standard error that assumes the null hypothesis.
c. It is based on normal approximation.
Teaching mode * TRAUMATIC STRESS
Cross Tables
			TRAUMATIC STRESS				Total
			ABSCENT	MILD	Teaching modeRATE	SEVERE
Teaching mode	On line	Counts	122	42	13	8	185
		% of Teaching mode	0.659459	0.227027	0.0702703	0.0432432	1
	Mix	Counts	12	2	1	1	16
		% of Teaching mode	0.75	0.125	0.0625	0.0625	1
	Presential	Counts	3	2	1	0	6
		% of Teaching mode	0.5	0.333333	0.166667	0	1
	Does not apply	Counts	7	3	1	0	11
		% of Teaching mode	0.636364	0.272727	0.0909091	0	1
Total		Counts	144	49	16	9	218
		% of Teaching mode	0.66055	0.224771	0.0733945	0.0412844	1
Pruebas de chi-cuadrado
	Value	df	Asymptotic significance (bilateral)
Pearson´s Chi-squared	3.279a	9	0.952196
Verisimilitude	3.8672	9	0.919934
Linear association	0.000614119	1	0.980229
# of valid cases	218
a. 10 cells (62.5%) with expected counts less than 5. The minimum count expected is.25.
Symetric measures
		Value	asymptotic standard error	approx. Tb	approx. significance
Interval	Pearson´s R	-0.00168227	0.0597208	-0.0247243	.980c
Ordinal	Spearman correlation	-0.000853689	0.067647	-0.0125466	.990c
# of valid cases		218
a. Null hypothesis is not asumed
b. Use of the asymptotic standard error that assumes the null hypothesis.
c. It is based on normal approximation.
Teaching mode * COMPULSIVE CHECKING
Cross Tables
			COMPULSIVE CHECKING				Total
			ABSCENT	MILD	Teaching modeRATE	SEVERE
Teaching mode	On line	Counts	79	69	28	9	185
		% of Teaching mode	0.427027	0.372973	0.151351	0.0486486	1
	Mix	Counts	7	7	1	1	16
		% of Teaching mode	0.4375	0.4375	0.0625	0.0625	1
	Presential	Counts	3	2	1	0	6
		% of Teaching mode	0.5	0.333333	0.166667	0	1
	Does not apply	Counts	6	4	1	0	11
		% of Teaching mode	0.545455	0.363636	0.0909091	0	1
Total		Counts	95	82	31	10	218
		% of Teaching mode	0.43578	0.376147	0.142202	0.0458716	1
Pruebas de chi-cuadrado
	Value	df	Asymptotic significance (bilateral)
Pearson´s Chi-squared	2.552a	9	0.97946
Verisimilitude	3.50724	9	0.94076
Linear association	1.29394	1	0.255323
# of valid cases	218
a. 10 cells (62.5%) with expected counts less than 5. The minimum count expected is.28.
Symetric measures
		Value	asymptotic standard error	approx. Tb	approx. significance
Interval	Pearson´s R	-0.0772196	0.0567092	-1.13829	.256c
Ordinal	Spearman correlation	-0.064035	0.0642083	-0.943054	.347c
# of valid cases		218
a. Null hypothesis is not asumed
b. Use of the asymptotic standard error that assumes the null hypothesis.
c. It is based on normal approximation.
Teaching mode * SOCIAL ECONOMICAL
Cross Tables
			SOCIAL ECONOMICAL				Total
			ABSCENT	MILD	Teaching modeRATE	SEVERE
Teaching mode	On line	Counts	40	90	47	8	185
		% of Teaching mode	0.216216	0.486486	0.254054	0.0432432	1
	Mix	Counts	2	8	5	1	16
		% of Teaching mode	0.125	0.5	0.3125	0.0625	1
	Presential	Counts	1	3	2	0	6
		% of Teaching mode	0.166667	0.5	0.333333	0	1
	Does not apply	Counts	3	3	5	0	11
		% of Teaching mode	0.272727	0.272727	0.454545	0	1
Total		Counts	46	104	59	9	218
		% of Teaching mode	0.211009	0.477064	0.270642	0.0412844	1
Pruebas de chi-cuadrado
	Value	df	Asymptotic significance (bilateral)
Pearson´s Chi-squared	4.507a	9	0.874959
Verisimilitude	5.20382	9	0.816191
Linear association	0.243798	1	0.621476
# of valid cases	218
a. 10 cells (62.5%) with expected counts less than 5. The minimum count expected is.25.
Symetric measures
		Value	asymptotic standard error	approx. Tb	approx. significance
Interval	Pearson´s R	0.0335186	0.0690268	0.492897	.623c
Ordinal	Spearman correlation	0.0593184	0.0690123	0.873336	.383c
# of valid cases		218
a. Null hypothesis is not asumed
b. Use of the asymptotic standard error that assumes the null hypothesis.
c. It is based on normal approximation.
Teaching mode * CONTAINATION
Cross Tables
			CONTAINATION				Total
			ABSCENT	MILD	Teaching modeRATE	SEVERE
Teaching mode	On line	Counts	34	60	62	26	182
		% of Teaching mode	0.186813	0.32967	0.340659	0.142857	1
	Mix	Counts	1	8	4	3	16
		% of Teaching mode	0.0625	0.5	0.25	0.1875	1
	Presential	Counts	0	3	2	1	6
		% of Teaching mode	0	0.5	0.333333	0.166667	1
	Does not apply	Counts	3	3	4	1	11
		% of Teaching mode	0.272727	0.272727	0.363636	0.0909091	1
Total		Counts	38	74	72	31	215
		% of Teaching mode	0.176744	0.344186	0.334884	0.144186	1
Pruebas de chi-cuadrado
	Value	df	Asymptotic significance (bilateral)
Pearson´s Chi-squared	5.584a	9	0.780745
Verisimilitude	6.82356	9	0.655483
Linear association	0.014083	1	0.905535
# of valid cases	215
a. 10 cells (62.5%) with expected counts less than 5. The minimum count expected is.87.
Symetric measures
		Value	asymptotic standard error	approx. Tb	approx. significance
Interval	Pearson´s R	-0.00811223	0.06797	-0.118398	.906c
Ordinal	Spearman correlation	0.00856594	0.0660184	0.12502	.901c
# of valid cases		215
a. Null hypothesis is not asumed
b. Use of the asymptotic standard error that assumes the null hypothesis.
c. It is based on normal approximation.
Teaching mode * FOBAP
Cross Tables
			FOBAP				Total
			ABSCENT	MILD	Teaching modeRATE	SEVERE
Teaching mode	On line	Counts	73	63	38	11	185
		% of Teaching mode	0.394595	0.340541	0.205405	0.0594595	1
	Mix	Counts	7	6	1	2	16
		% of Teaching mode	0.4375	0.375	0.0625	0.125	1
	Presential	Counts	2	4	0	0	6
		% of Teaching mode	0.333333	0.666667	0	0	1
	Does not apply	Counts	7	2	1	1	11
		% of Teaching mode	0.636364	0.181818	0.0909091	0.0909091	1
Total		Counts	89	75	40	14	218
		% of Teaching mode	0.408257	0.344037	0.183486	0.0642202	1
Pruebas de chi-cuadrado
	Value	df	Asymptotic significance (bilateral)
Pearson´s Chi-squared	9.179a	9	0.420922
Verisimilitude	10.5731	9	0.306108
Linear association	1.42965	1	0.231822
# of valid cases	218
a. 10 cells (62.5%) with expected counts less than 5. The minimum count expected is.39.
Symetric measures
		Value	asymptotic standard error	approx. Tb	approx. significance
Interval	Pearson´s R	-0.081168	0.0684417	-1.19687	.233c
Ordinal	Spearman correlation	-0.0831971	0.0662592	-1.227	.221c
# of valid cases		218
a. Null hypothesis is not asumed
b. Use of the asymptotic standard error that assumes the null hypothesis.
c. It is based on normal approximation.
Teaching mode * Teaching anxiety and preparedness
Cross Tables
			Teaching anxiety and preparedness				Total
			ABSCENT	MILD	Teaching modeRATE	SEVERE
Teaching mode	On line	Counts	9	121	54	1	185
		% of Teaching mode	0.0486486	0.654054	0.291892	0.00540541	1
	Mix	Counts	2	10	4	0	16
		% of Teaching mode	0.125	0.625	0.25	0	1
	Presential	Counts	1	3	2	0	6
		% of Teaching mode	0.166667	0.5	0.333333	0	1
	Does not apply	Counts	2	5	4	0	11
		% of Teaching mode	0.181818	0.454545	0.363636	0	1
Total		Counts	14	139	64	1	218
		% of Teaching mode	0.0642202	0.637615	0.293578	0.00458716	1
Pruebas de chi-cuadrado
	Value	df	Asymptotic significance (bilateral)
Pearson´s Chi-squared	6.307a	9	0.708857
Verisimilitude	5.29401	9	0.807962
Linear association	0.529504	1	0.466816
# of valid cases	218
a. 11 cells (68.8%) with expected counts less than 5. The minimum count expected is.03.
Symetric measures
		Value	asymptotic standard error	approx. Tb	approx. significance
Interval	Pearson´s R	-0.0493975	0.0818492	-0.726879	.468c
Ordinal	Spearman correlation	-0.047985	0.076319	-0.706046	.481c
# of valid cases		218
a. Null hypothesis is not asumed
b. Use of the asymptotic standard error that assumes the null hypothesis.
c. It is based on normal approximation.
Teaching mode * RESILIENCE
Cross Tables
			RESILIENCE					Total
			Very low	Low	Normal	High	Very High
Teaching mode	On line	Counts	9	3	18	56	99	185
		% of Teaching mode	0.0486486	0.0162162	0.0972973	0.302703	0.535135	1
	Mix	Counts	0	0	3	5	8	16
		% of Teaching mode	0	0	0.1875	0.3125	0.5	1
	Presential	Counts	0	0	0	3	3	6
		% of Teaching mode	0	0	0	0.5	0.5	1
	Does not apply	Counts	1	0	0	3	7	11
		% of Teaching mode	0.0909091	0	0	0.272727	0.636364	1
Total		Counts	10	3	21	67	117	218
		% of Teaching mode	0.0458716	0.0137615	0.0963303	0.307339	0.536697	1
Pruebas de chi-cuadrado
	Value	df	Asymptotic significance (bilateral)
Pearson´s Chi-squared	6.123a	12	0.909741
Verisimilitude	8.68281	12	0.729757
Linear association	0.307198	1	0.579405
# of valid cases	218
a. 14 cells (70.0%) with expected counts less than 5. The minimum count expected is.08.
Symetric measures
		Value	asymptotic standard error	approx. Tb	approx. significance
Interval	Pearson´s R	0.0376252	0.0698955	0.553368	.581c
Ordinal	Spearman correlation	0.0246614	0.0650696	0.362557	.717c
# of valid cases		218
a. Null hypothesis is not asumed
b. Use of the asymptotic standard error that assumes the null hypothesis.
c. It is based on normal approximation.
Teaching mode * TOTALSECTIONS
Cross Tables
			TOTALSECTIONS				Total
			ABSCENT	MILD	Teaching modeRATE	SEVERE
Teaching mode	On line	Counts	34	88	57	6	185
		% of Teaching mode	0.183784	0.475676	0.308108	0.0324324	1
	Mix	Counts	0	12	3	1	16
		% of Teaching mode	0	0.75	0.1875	0.0625	1
	Presential	Counts	1	3	2	0	6
		% of Teaching mode	0.166667	0.5	0.333333	0	1
	Does not apply	Counts	2	7	2	0	11
		% of Teaching mode	0.181818	0.636364	0.181818	0	1
Total		Counts	37	110	64	7	218
		% of Teaching mode	0.169725	0.504587	0.293578	0.0321101	1
Pruebas de chi-cuadrado
	Value	df	Asymptotic significance (bilateral)
Pearson´s Chi-squared	7.789a	9	0.555528
Verisimilitude	10.8315	9	0.287434
Linear association	0.293508	1	0.587981
# of valid cases	218
a. 10 cells (62.5%) with expected counts less than 5. The minimum count expected is.19.
Symetric measures
		Value	asymptotic standard error	approx. Tb	approx. significance
Interval	Pearson´s R	-0.0367773	0.0586855	-0.54088	.589c
Ordinal	Spearman correlation	-0.0165393	0.0597548	-0.24311	.808c
# of valid cases		218
a. Null hypothesis is not asumed
b. Use of the asymptotic standard error that assumes the null hypothesis.
c. It is based on normal approximation.
MODE (ONLINE)
Danger
	Counts	N esperada	Residue
Absent.00	18	46.25	-28.25
Mild.00	56	46.25	9.75
Moderate.00	80	46.25	33.75
Severe.00	31	46.25	-15.25
Total	185
Xenophobia
	Counts	N esperada	Residue
Absent.00	40	46.25	-6.25
Mild.00	77	46.25	30.75
Moderate.00	57	46.25	10.75
Severe.00	11	46.25	-35.25
Total	185
Traumatic Stress
	Counts	N esperada	Residue
Absent.00	122	46.25	75.75
Mild.00	42	46.25	-4.25
Moderate.00	13	46.25	-33.25
Severe.00	8	46.25	-38.25
Total	185
Compulsive Checking
	Counts	N esperada	Residue
Absent.00	79	46.25	32.75
Mild.00	69	46.25	22.75
Moderate.00	28	46.25	-18.25
Severe.00	9	46.25	-37.25
Total	185
Contamination
	Counts	N esperada	Residue
Absent.00	40	46.25	-6.25
Mild.00	90	46.25	43.75
Moderate.00	47	46.25	0.75
Severe.00	8	46.25	-38.25
Total	185
Social Economical
	Counts	N esperada	Residue
Absent.00	34	45.5	-11.5
Mild.00	60	45.5	14.5
Moderate.00	62	45.5	16.5
Severe.00	26	45.5	-19.5
Total	182
FOBAP
	Counts	N esperada	Residue
Absent.00	73	46.25	26.75
Mild.00	63	46.25	16.75
Moderate.00	38	46.25	-8.25
Severe.00	11	46.25	-35.25
Total	185
Teaching Anxeity and Preparedness
	Counts	N esperada	Residue
Absent.00	9	46.25	-37.25
Mild.00	121	46.25	74.75
Moderate.00	54	46.25	7.75
Severe.00	1	46.25	-45.25
Total	185
Resilience
	Counts	N esperada	Residue
Absent.00	9	37	-28
Mild.00	3	37	-34
Moderate.00	18	37	-19
Severe.00	56	37	19
Very High.00	99	37	62
Total	185
Total Sections
	Counts	N esperada	Residue
Absent.00	34	46.25	-12.25
Mild.00	88	46.25	41.75
Moderate.00	57	46.25	10.75
Severe.00	6	46.25	-40.25
Total	185
Estadísticos de prueba
	Danger	Xenophobia	Traumatic Stress	Compulsive Checking	Contamination	Social Economical	FOBAP	Teaching Anxeity and Preparedness	Resilience	Total Sections
Chi-cuadrado	48.968a	50.654a	179.995a	71.584a	73.876a	21.868b	49.876a	196.384a	175.838c	78.459a
gl	3	3	3	3	3	3	3	3	4	3
Sig. asintótica	1.32536e-10	5.79685e-11	8.84368e-39	1.95466e-15	6.31038e-16	6.94847e-05	8.49139e-11	2.54971e-42	5.83839e-37	6.56811e-17
a. 0 cells (0.0% ) has an expected frequency count lower than 5. The minimal expected cell count is 46.3
b. 0 cells (0.0% ) has an expected frequency count lower than 5. The minimal expected cell count is 45.5
c. 0 cells (0.0% ) has an expected frequency count lower than 5. The minimal expected cell count is 37.0.
MODE (MIX)
Danger
	Counts	N esperada	Residue
Absent.00	1	4	-3
Mild.00	8	4	4
Moderate.00	5	4	1
Severe.00	2	4	-2
Total	16
Xenophobia
	Counts	N esperada	Residue
Absent.00	3	4	-1
Mild.00	7	4	3
Moderate.00	4	4	0
Severe.00	2	4	-2
Total	16
Traumatic Stress
	Counts	N esperada	Residue
Absent.00	12	4	8
Mild.00	2	4	-2
Moderate.00	1	4	-3
Severe.00	1	4	-3
Total	16
Compulsive Checking
	Counts	N esperada	Residue
Absent.00	7	4	3
Mild.00	7	4	3
Moderate.00	1	4	-3
Severe.00	1	4	-3
Total	16
Contamination
	Counts	N esperada	Residue
Absent.00	2	4	-2
Mild.00	8	4	4
Moderate.00	5	4	1
Severe.00	1	4	-3
Total	16
Social Economical
	Counts	N esperada	Residue
Absent.00	1	4	-3
Mild.00	8	4	4
Moderate.00	4	4	0
Severe.00	3	4	-1
Total	16
FOBAP
	Counts	N esperada	Residue
Absent.00	7	4	3
Mild.00	6	4	2
Moderate.00	1	4	-3
Severe.00	2	4	-2
Total	16
Teaching Anxeity and Preparedness
	Counts	N esperada	Residue
Absent.00	2	5.33333	-3.33333
Mild.00	10	5.33333	4.66667
Moderate.00	4	5.33333	-1.33333
Total	16
Resilience
	Counts	N esperada	Residue
Moderate.00	3	5.33333	-2.33333
Severe.00	5	5.33333	-0.333333
Very High.00	8	5.33333	2.66667
Total	16
Total Sections
	Counts	N esperada	Residue
Mild.00	12	5.33333	6.66667
Moderate.00	3	5.33333	-2.33333
Severe.00	1	5.33333	-4.33333
Total	16
Estadísticos de prueba
	Danger	Xenophobia	Traumatic Stress	Compulsive Checking	Contamination	Social Economical	FOBAP	Teaching Anxeity and Preparedness	Resilience	Total Sections
Chi-cuadrado	7.500a	3.500a	21.500a	9.000a	7.500a	6.500a	6.500a	6.500b	2.375b	12.875b
gl	3	3	3	3	3	3	3	2	2	2
Sig. asintótica	0.0575585	0.320762	8.28785e-05	0.0292909	0.0575585	0.0896625	0.0896625	0.0387742	0.304983	0.0016004
a. 4 cells (100.0%) have expected count lower than 5. The minimum expected count is 4.0.
b. 0 cells (0.0% ) has an expected frequency count lower than 5. The minimal expected cell count is 5.3
MODE (In person)
Danger
	Counts	N esperada	Residue
Mild.00	3	2	1
Moderate.00	2	2	0
Severe.00	1	2	-1
Total	6
Xenophobia
	Counts	N esperada	Residue
Absent.00	1	2	-1
Mild.00	4	2	2
Moderate.00	1	2	-1
Total	6
Traumatic Stress
	Counts	N esperada	Residue
Absent.00	3	2	1
Mild.00	2	2	0
Moderate.00	1	2	-1
Total	6
Compulsive Checking
	Counts	N esperada	Residue
Absent.00	3	2	1
Mild.00	2	2	0
Moderate.00	1	2	-1
Total	6
Contamination
	Counts	N esperada	Residue
Absent.00	1	2	-1
Mild.00	3	2	1
Moderate.00	2	2	0
Total	6
Social Economical
	Counts	N esperada	Residue
Mild.00	3	2	1
Moderate.00	2	2	0
Severe.00	1	2	-1
Total	6
FOBAP
	Counts	N esperada	Residue
Absent.00	2	3	-1
Mild.00	4	3	1
Total	6
Teaching Anxeity and Preparedness
	Counts	N esperada	Residue
Absent.00	1	2	-1
Mild.00	3	2	1
Moderate.00	2	2	0
Total	6
Resilience
	Counts	N esperada	Residue
Severe.00	3	3	0
Very High.00	3	3	0
Total	6
Total Sections
	Counts	N esperada	Residue
Absent.00	1	2	-1
Mild.00	3	2	1
Moderate.00	2	2	0
Total	6
Estadísticos de prueba
	Danger	Xenophobia	Traumatic Stress	Compulsive Checking	Contamination	Social Economical	FOBAP	Teaching Anxeity and Preparedness	Resilience	Total Sections
Chi-cuadrado	1.000a	3.000a	1.000a	1.000a	1.000a	1.000a	.667b	1.000a	.000b	1.000a
gl	2	2	2	2	2	2	1	2	1	2
Sig. asintótica	0.606531	0.22313	0.606531	0.606531	0.606531	0.606531	0.414216	0.606531	1	0.606531
a. 3 cells (100%) have an expected count frequency lower than5. The minumum expected cell count is 2.0
b. 2 cells (100.0%) have an expected frequency count lower than 5. The minimal expected cell count is 3.0
