# Supplementary material for: Teaching Anxiety, Stress and Resilience during the COVID-19 Pandemic: Evaluating the Vulnerability of Academic Professionals in Mexico through the Adapted COVID-19 Stress Scales
Source: Preprints.org preprint supplement (doi:10.20944/preprints202101.0406.v1), 2021-01-20
Supplement: Supplementary file 11 [file Table S8.xlsx]

## Sheet: Supplemental Table 8
WORK HOURS * DANGER
Cross Tables
			DANGER				Total
			ABSCENT	MILD	Teaching Teaching modeRATE	SEVERE
WORK HOURS	1 - 4h	Counts	1	5	9	2	17
		% of WORK HOURS	0.0588235	0.294118	0.529412	0.117647	1
	4 - 6h	Counts	4	8	23	6	41
		% of WORK HOURS	0.097561	0.195122	0.560976	0.146341	1
	6 - 8h	Counts	9	31	24	9	73
		% of WORK HOURS	0.123288	0.424658	0.328767	0.123288	1
	above 8h	Counts	5	24	34	18	81
		% of WORK HOURS	0.0617284	0.296296	0.419753	0.222222	1
Total		Counts	19	68	90	35	212
		% of WORK HOURS	0.0896226	0.320755	0.424528	0.165094	1
Pruebas de chi-cuadrado
	Value	df	Asymptotic significance (bilateral)
Pearson´s Chi-squared	13.011a	9	0.162096
Verisimilitude	13.0138	9	0.161985
Linear association	0.258602	1	0.611082
# of valid cases	212
a. 3 cells (18.8%) with expected counts less than 5. The minimum count expected is1.52.
Symetric measures
		Value	asymptotic standard error	approx. Tb	approx. significance
Interval	Pearson´s R	0.0350086	0.0652044	0.507634	.612c
Ordinal	Spearman correlation	0.046947	0.0674831	0.681077	.497c
# of valid cases		212
a. Null hypothesis is not asumed
b. Use of the asymptotic standard error that assumes the null hypothesis.
c. It is based on normal approximation.
WORK HOURS * XENOPHOBIA
Cross Tables
			XENOPHOBIA				Total
			ABSCENT	MILD	Teaching Teaching modeRATE	SEVERE
WORK HOURS	1 - 4h	Counts	3	4	8	2	17
		% of WORK HOURS	0.176471	0.235294	0.470588	0.117647	1
	4 - 6h	Counts	8	15	17	1	41
		% of WORK HOURS	0.195122	0.365854	0.414634	0.0243902	1
	6 - 8h	Counts	18	34	15	6	73
		% of WORK HOURS	0.246575	0.465753	0.205479	0.0821918	1
	above 8h	Counts	16	35	24	6	81
		% of WORK HOURS	0.197531	0.432099	0.296296	0.0740741	1
Total		Counts	45	88	64	15	212
		% of WORK HOURS	0.212264	0.415094	0.301887	0.0707547	1
Pruebas de chi-cuadrado
	Value	df	Asymptotic significance (bilateral)
Pearson´s Chi-squared	10.225a	9	0.332592
Verisimilitude	10.6541	9	0.300169
Linear association	0.760534	1	0.383162
# of valid cases	212
a. 3 cells (18.8%) with expected counts less than 5. The minimum count expected is1.20.
Symetric measures
		Value	asymptotic standard error	approx. Tb	approx. significance
Interval	Pearson´s R	-0.0600369	0.0699693	-0.871589	.384c
Ordinal	Spearman correlation	-0.0485892	0.0696958	-0.704957	.482c
# of valid cases		212
a. Null hypothesis is not asumed
b. Use of the asymptotic standard error that assumes the null hypothesis.
c. It is based on normal approximation.
WORK HOURS * TRAUMATIC STRESS
Cross Tables
			TRAUMATIC STRESS				Total
			ABSCENT	MILD	Teaching Teaching modeRATE	SEVERE
WORK HOURS	1 - 4h	Counts	10	7	0	0	17
		% of WORK HOURS	0.588235	0.411765	0	0	1
	4 - 6h	Counts	25	11	5	0	41
		% of WORK HOURS	0.609756	0.268293	0.121951	0	1
	6 - 8h	Counts	52	14	4	3	73
		% of WORK HOURS	0.712329	0.191781	0.0547945	0.0410959	1
	above 8h	Counts	50	16	9	6	81
		% of WORK HOURS	0.617284	0.197531	0.111111	0.0740741	1
Total		Counts	137	48	18	9	212
		% of WORK HOURS	0.646226	0.226415	0.0849057	0.0424528	1
Pruebas de chi-cuadrado
	Value	df	Asymptotic significance (bilateral)
Pearson´s Chi-squared	12.268a	9	0.198634
Verisimilitude	15.2967	9	0.0831028
Linear association	1.49407	1	0.221586
# of valid cases	212
a. 7 cells (43.8%) with expected counts less than 5. The minimum count expected is.72.
Symetric measures
		Value	asymptotic standard error	approx. Tb	approx. significance
Interval	Pearson´s R	0.0841481	0.0605939	1.22376	.222c
Ordinal	Spearman correlation	0.0381279	0.0693325	0.552928	.581c
# of valid cases		212
a. Null hypothesis is not asumed
b. Use of the asymptotic standard error that assumes the null hypothesis.
c. It is based on normal approximation.
WORK HOURS * COMPULSIVE CHECKING
Cross Tables
			COMPULSIVE CHECKING				Total
			ABSCENT	MILD	Teaching Teaching modeRATE	SEVERE
WORK HOURS	1 - 4h	Counts	5	9	2	1	17
		% of WORK HOURS	0.294118	0.529412	0.117647	0.0588235	1
	4 - 6h	Counts	18	15	7	1	41
		% of WORK HOURS	0.439024	0.365854	0.170732	0.0243902	1
	6 - 8h	Counts	39	23	6	5	73
		% of WORK HOURS	0.534247	0.315068	0.0821918	0.0684932	1
	above 8h	Counts	27	34	16	4	81
		% of WORK HOURS	0.333333	0.419753	0.197531	0.0493827	1
Total		Counts	89	81	31	11	212
		% of WORK HOURS	0.419811	0.382075	0.146226	0.0518868	1
Pruebas de chi-cuadrado
	Value	df	Asymptotic significance (bilateral)
Pearson´s Chi-squared	11.328a	9	0.253884
Verisimilitude	11.6252	9	0.235272
Linear association	0.572632	1	0.449215
# of valid cases	212
a. 5 cells (31.3%) with expected counts less than 5. The minimum count expected is.88.
Symetric measures
		Value	asymptotic standard error	approx. Tb	approx. significance
Interval	Pearson´s R	0.0520951	0.066244	0.755956	.451c
Ordinal	Spearman correlation	0.077263	0.0675543	1.123	.263c
# of valid cases		212
a. Null hypothesis is not asumed
b. Use of the asymptotic standard error that assumes the null hypothesis.
c. It is based on normal approximation.
WORK HOURS * SOCIAL ECONOMICAL
Cross Tables
			SOCIAL ECONOMICAL				Total
			ABSCENT	MILD	Teaching Teaching modeRATE	SEVERE
WORK HOURS	1 - 4h	Counts	5	3	9	0	17
		% of WORK HOURS	0.294118	0.176471	0.529412	0	1
	4 - 6h	Counts	8	16	16	1	41
		% of WORK HOURS	0.195122	0.390244	0.390244	0.0243902	1
	6 - 8h	Counts	16	39	14	4	73
		% of WORK HOURS	0.219178	0.534247	0.191781	0.0547945	1
	above 8h	Counts	14	43	19	5	81
		% of WORK HOURS	0.17284	0.530864	0.234568	0.0617284	1
Total		Counts	43	101	58	10	212
		% of WORK HOURS	0.20283	0.476415	0.273585	0.0471698	1
Pruebas de chi-cuadrado
	Value	df	Asymptotic significance (bilateral)
Pearson´s Chi-squared	16.081a	9	0.0652064
Verisimilitude	17.0193	9	0.0484153
Linear association	0.1309	1	0.717501
# of valid cases	212
a. 6 cells (37.5%) with expected counts less than 5. The minimum count expected is.80.
Symetric measures
		Value	asymptotic standard error	approx. Tb	approx. significance
Interval	Pearson´s R	-0.0249074	0.0709916	-0.361055	.718c
Ordinal	Spearman correlation	-0.0355269	0.0718451	-0.515159	.607c
# of valid cases		212
a. Null hypothesis is not asumed
b. Use of the asymptotic standard error that assumes the null hypothesis.
c. It is based on normal approximation.
WORK HOURS * CONTAINATION
Cross Tables
			CONTAINATION				Total
			ABSCENT	MILD	Teaching Teaching modeRATE	SEVERE
WORK HOURS	1 - 4h	Counts	1	5	8	3	17
		% of WORK HOURS	0.0588235	0.294118	0.470588	0.176471	1
	4 - 6h	Counts	6	15	12	8	41
		% of WORK HOURS	0.146341	0.365854	0.292683	0.195122	1
	6 - 8h	Counts	15	27	22	8	72
		% of WORK HOURS	0.208333	0.375	0.305556	0.111111	1
	above 8h	Counts	12	26	29	12	79
		% of WORK HOURS	0.151899	0.329114	0.367089	0.151899	1
Total		Counts	34	73	71	31	209
		% of WORK HOURS	0.162679	0.349282	0.339713	0.148325	1
Pruebas de chi-cuadrado
	Value	df	Asymptotic significance (bilateral)
Pearson´s Chi-squared	5.503a	9	0.788458
Verisimilitude	5.73542	9	0.766079
Linear association	0.480868	1	0.488029
# of valid cases	209
a. 2 cells (12.5%) with expected counts less than 5. The minimum count expected is2.52.
Symetric measures
		Value	asymptotic standard error	approx. Tb	approx. significance
Interval	Pearson´s R	-0.0480819	0.0670526	-0.692579	.489c
Ordinal	Spearman correlation	-0.0239981	0.0687489	-0.345372	.730c
# of valid cases		209
a. Null hypothesis is not asumed
b. Use of the asymptotic standard error that assumes the null hypothesis.
c. It is based on normal approximation.
WORK HOURS * FOBAP
Cross Tables
			FOBAP				Total
			ABSCENT	MILD	Teaching Teaching modeRATE	SEVERE
WORK HOURS	1 - 4h	Counts	9	4	2	2	17
		% of WORK HOURS	0.529412	0.235294	0.117647	0.117647	1
	4 - 6h	Counts	15	14	10	2	41
		% of WORK HOURS	0.365854	0.341463	0.243902	0.0487805	1
	6 - 8h	Counts	32	25	11	5	73
		% of WORK HOURS	0.438356	0.342466	0.150685	0.0684932	1
	above 8h	Counts	28	31	17	5	81
		% of WORK HOURS	0.345679	0.382716	0.209877	0.0617284	1
Total		Counts	84	74	40	14	212
		% of WORK HOURS	0.396226	0.349057	0.188679	0.0660377	1
Pruebas de chi-cuadrado
	Value	df	Asymptotic significance (bilateral)
Pearson´s Chi-squared	5.384a	9	0.799668
Verisimilitude	5.33799	9	0.803906
Linear association	0.258862	1	0.610903
# of valid cases	212
a. 4 cells (25.0%) with expected counts less than 5. The minimum count expected is1.12.
Symetric measures
		Value	asymptotic standard error	approx. Tb	approx. significance
Interval	Pearson´s R	0.0350262	0.071463	0.507889	.612c
Ordinal	Spearman correlation	0.0502277	0.0695734	0.728789	.467c
# of valid cases		212
a. Null hypothesis is not asumed
b. Use of the asymptotic standard error that assumes the null hypothesis.
c. It is based on normal approximation.
WORK HOURS * Teaching anxiety and preparedness
Cross Tables
			Teaching anxiety and preparedness				Total
			ABSCENT	MILD	Teaching Teaching modeRATE	SEVERE
WORK HOURS	1 - 4h	Counts	3	11	3	0	17
		% of WORK HOURS	0.176471	0.647059	0.176471	0	1
	4 - 6h	Counts	1	29	11	0	41
		% of WORK HOURS	0.0243902	0.707317	0.268293	0	1
	6 - 8h	Counts	6	45	22	0	73
		% of WORK HOURS	0.0821918	0.616438	0.30137	0	1
	above 8h	Counts	3	51	26	1	81
		% of WORK HOURS	0.037037	0.62963	0.320988	0.0123457	1
Total		Counts	13	136	62	1	212
		% of WORK HOURS	0.0613208	0.641509	0.292453	0.00471698	1
Pruebas de chi-cuadrado
	Value	df	Asymptotic significance (bilateral)
Pearson´s Chi-squared	8.979a	9	0.439241
Verisimilitude	8.50651	9	0.484014
Linear association	3.06119	1	0.0801829
# of valid cases	212
a. 9 cells (56.3%) with expected counts less than 5. The minimum count expected is.08.
Symetric measures
		Value	asymptotic standard error	approx. Tb	approx. significance
Interval	Pearson´s R	0.120449	0.067948	1.75828	.080c
Ordinal	Spearman correlation	0.104086	0.0670809	1.51658	.131c
# of valid cases		212
a. Null hypothesis is not asumed
b. Use of the asymptotic standard error that assumes the null hypothesis.
c. It is based on normal approximation.
WORK HOURS * RESILIENCE
Cross Tables
			RESILIENCE					Total
			Very low	Low	Normal	High	Very High
WORK HOURS	1 - 4h	Counts	0	0	1	7	9	17
		% of WORK HOURS	0	0	0.0588235	0.411765	0.529412	1
	4 - 6h	Counts	1	0	5	13	22	41
		% of WORK HOURS	0.0243902	0	0.121951	0.317073	0.536585	1
	6 - 8h	Counts	4	3	3	19	44	73
		% of WORK HOURS	0.0547945	0.0410959	0.0410959	0.260274	0.60274	1
	above 8h	Counts	3	1	12	25	40	81
		% of WORK HOURS	0.037037	0.0123457	0.148148	0.308642	0.493827	1
Total		Counts	8	4	21	64	115	212
		% of WORK HOURS	0.0377358	0.0188679	0.0990566	0.301887	0.542453	1
Pruebas de chi-cuadrado
	Value	df	Asymptotic significance (bilateral)
Pearson´s Chi-squared	11.521a	12	0.484871
Verisimilitude	13.1762	12	0.356368
Linear association	1.17541	1	0.278292
# of valid cases	212
a. 10 cells (50.0%) with expected counts less than 5. The minimum count expected is.32.
Symetric measures
		Value	asymptotic standard error	approx. Tb	approx. significance
Interval	Pearson´s R	-0.074637	0.0577564	-1.08462	.279c
Ordinal	Spearman correlation	-0.0652163	0.0672132	-0.94709	.345c
# of valid cases		212
a. Null hypothesis is not asumed
b. Use of the asymptotic standard error that assumes the null hypothesis.
c. It is based on normal approximation.
WORK HOURS * TOTALSECTIONS
Cross Tables
			TOTALSECTIONS				Total
			ABSCENT	MILD	Teaching Teaching modeRATE	SEVERE
WORK HOURS	1 - 4h	Counts	2	7	8	0	17
		% of WORK HOURS	0.117647	0.411765	0.470588	0	1
	4 - 6h	Counts	5	20	16	0	41
		% of WORK HOURS	0.121951	0.487805	0.390244	0	1
	6 - 8h	Counts	16	42	11	4	73
		% of WORK HOURS	0.219178	0.575342	0.150685	0.0547945	1
	above 8h	Counts	11	38	28	4	81
		% of WORK HOURS	0.135802	0.469136	0.345679	0.0493827	1
Total		Counts	34	107	63	8	212
		% of WORK HOURS	0.160377	0.504717	0.29717	0.0377358	1
Pruebas de chi-cuadrado
	Value	df	Asymptotic significance (bilateral)
Pearson´s Chi-squared	15.560a	9	0.0766671
Verisimilitude	18.3267	9	0.0315665
Linear association	0.0049103	1	0.944135
# of valid cases	212
a. 5 cells (31.3%) with expected counts less than 5. The minimum count expected is.64.
Symetric measures
		Value	asymptotic standard error	approx. Tb	approx. significance
Interval	Pearson´s R	0.00482406	0.0658707	0.0699081	.944c
Ordinal	Spearman correlation	0.0170885	0.0693222	0.247672	.805c
# of valid cases		212
a. Null hypothesis is not asumed
b. Use of the asymptotic standard error that assumes the null hypothesis.
c. It is based on normal approximation.
Chi-squared testing
WORKS 1 TO 4 HOURS
DANGER
	Counts	N expected	Residue
ABSENT	1	4.25	-3.25
MILD	5	4.25	0.75
MODERATE	9	4.25	4.75
SEVERE	2	4.25	-2.25
Total	17
XENOPHOBIA
	Counts	N expected	Residue
ABSENT	3	4.25	-1.25
MILD	4	4.25	-0.25
MODERATE	8	4.25	3.75
SEVERE	2	4.25	-2.25
Total	17
TRAUMATIC STRESS
	Counts	N expected	Residue
ABSENT	10	8.5	1.5
MILD	7	8.5	-1.5
Total	17
COMPULSIVE CHECKING
	Counts	N expected	Residue
ABSENT	5	4.25	0.75
MILD	9	4.25	4.75
MODERATE	2	4.25	-2.25
SEVERE	1	4.25	-3.25
Total	17
CONTAMINATION
	Counts	N expected	Residue
ABSENT	5	5.66667	-0.666667
MILD	3	5.66667	-2.66667
MODERATE	9	5.66667	3.33333
Total	17
SOCIAL ECONOMICAL
	Counts	N expected	Residue
ABSENT	1	4.25	-3.25
MILD	5	4.25	0.75
MODERATE	8	4.25	3.75
SEVERE	3	4.25	-1.25
Total	17
FOBAP
	Counts	N expected	Residue
ABSENT	9	4.25	4.75
MILD	4	4.25	-0.25
MODERATE	2	4.25	-2.25
SEVERE	2	4.25	-2.25
Total	17
TEACHING ANXIETY AND PREPAREDNESS
	Counts	N expected	Residue
ABSENT	3	5.66667	-2.66667
MILD	11	5.66667	5.33333
MODERATE	3	5.66667	-2.66667
Total	17
RESILIENCE
	Counts	N expected	Residue
NORMAL	1	5.66667	-4.66667
HIGH	7	5.66667	1.33333
VERY HIGH	9	5.66667	3.33333
Total	17
TOTAL SECTIONS
	Counts	N expected	Residue
ABSENT	2	5.66667	-3.66667
MILD	7	5.66667	1.33333
MODERATE	8	5.66667	2.33333
Total	17
Estadísticos de prueba
	DANGER	XENOPHOBIA	TRAUMATIC STRESS	COMPULSIVE CHECKING	CONTAMINATION	SOCIAL ECONOMICAL	FOBAP	TEACHING ANXIETY AND PREPAREDNESS	RESILIENCE	TOTAL SECTIONS
Chi-cuadrado	9.118a	4.882a	.529b	9.118a	3.294c	6.294a	7.706a	7.529c	6.118c	3.647c
gl	3	3	1	3	2	3	3	2	2	2
Sig. asintótica	0.0277669	0.180617	0.466854	0.0277669	0.192616	0.0981454	0.0524979	0.0231744	0.0469429	0.161455
a. 4 casillas (100.0%) han esperado frecuencias menores que 5. La frecuencia mínima de casilla esperada es 4.3.
b.0 cells (0.0%) have an expected count lower than 5. The minimal expected frequency cell count is 8.5.
c.0 cells (0.0%) have an expected count lower than 5. The minimal expected frequency cell count is 5.7.
WORKS 4 TO 6 HOURS
DANGER
	Counts	N expected	Residue
ABSENT	4	10.25	-6.25
MILD	8	10.25	-2.25
MODERATE	23	10.25	12.75
SEVERE	6	10.25	-4.25
Total	41
XENOPHOBIA
	Counts	N expected	Residue
ABSENT	8	10.25	-2.25
MILD	15	10.25	4.75
MODERATE	17	10.25	6.75
SEVERE	1	10.25	-9.25
Total	41
TRAUMATIC STRESS
	Counts	N expected	Residue
ABSENT	25	13.6667	11.3333
MILD	11	13.6667	-2.66667
MODERATE	5	13.6667	-8.66667
Total	41
COMPULSIVE CHECKING
	Counts	N expected	Residue
ABSENT	18	10.25	7.75
MILD	15	10.25	4.75
MODERATE	7	10.25	-3.25
SEVERE	1	10.25	-9.25
Total	41
CONTAMINATION
	Counts	N expected	Residue
ABSENT	8	10.25	-2.25
MILD	16	10.25	5.75
MODERATE	16	10.25	5.75
SEVERE	1	10.25	-9.25
Total	41
SOCIAL ECONOMICAL
	Counts	N expected	Residue
ABSENT	6	10.25	-4.25
MILD	15	10.25	4.75
MODERATE	12	10.25	1.75
SEVERE	8	10.25	-2.25
Total	41
FOBAP
	Counts	N expected	Residue
ABSENT	15	10.25	4.75
MILD	14	10.25	3.75
MODERATE	10	10.25	-0.25
SEVERE	2	10.25	-8.25
Total	41
TEACHING ANXIETY AND PREPAREDNESS
	Counts	N expected	Residue
ABSENT	1	13.6667	-12.6667
MILD	29	13.6667	15.3333
MODERATE	11	13.6667	-2.66667
Total	41
RESILIENCE
	Counts	N expected	Residue
VERY LOW	1	10.25	-9.25
NORMAL	5	10.25	-5.25
HIGH	13	10.25	2.75
VERY HIGH	22	10.25	11.75
Total	41
TOTAL SECTIONS
	Counts	N expected	Residue
ABSENT	5	13.6667	-8.66667
MILD	20	13.6667	6.33333
MODERATE	16	13.6667	2.33333
Total	41
Estadísticos de prueba
	DANGER	XENOPHOBIA	TRAUMATIC STRESS	COMPULSIVE CHECKING	CONTAMINATION	SOCIAL ECONOMICAL	FOBAP	TEACHING ANXIETY AND PREPAREDNESS	RESILIENCE	TOTAL SECTIONS
Chi-cuadrado	21.927a	15.488a	15.415b	17.439a	15.293a	4.756a	10.220a	29.463b	25.244a	8.829b
gl	3	3	2	3	3	3	3	2	3	2
Sig. asintótica	6.75583e-05	0.00144386	0.000449526	0.000574001	0.00158287	0.190553	0.0167895	4.00038e-07	1.37295e-05	0.012099
a.0 cells (0.0%) have an expected count lower than 5. The minimal expected frequency cell count is 10.3.
b.0 cells (0.0%) have an expected count lower than 5. The minimal expected frequency cell count is 13.7.
WORKS 6 TO 8 HOURS
DANGER
	Counts	N expected	Residue
ABSENT	9	18.25	-9.25
MILD	31	18.25	12.75
MODERATE	24	18.25	5.75
SEVERE	9	18.25	-9.25
Total	73
XENOPHOBIA
	Counts	N expected	Residue
ABSENT	18	18.25	-0.25
MILD	34	18.25	15.75
MODERATE	15	18.25	-3.25
SEVERE	6	18.25	-12.25
Total	73
TRAUMATIC STRESS
	Counts	N expected	Residue
ABSENT	52	18.25	33.75
MILD	14	18.25	-4.25
MODERATE	4	18.25	-14.25
SEVERE	3	18.25	-15.25
Total	73
COMPULSIVE CHECKING
	Counts	N expected	Residue
ABSENT	39	18.25	20.75
MILD	23	18.25	4.75
MODERATE	6	18.25	-12.25
SEVERE	5	18.25	-13.25
Total	73
CONTAMINATION
	Counts	N expected	Residue
ABSENT	16	18.25	-2.25
MILD	39	18.25	20.75
MODERATE	14	18.25	-4.25
SEVERE	4	18.25	-14.25
Total	73
SOCIAL ECONOMICAL
	Counts	N expected	Residue
ABSENT	15	18	-3
MILD	27	18	9
MODERATE	22	18	4
SEVERE	8	18	-10
Total	72
FOBAP
	Counts	N expected	Residue
ABSENT	32	18.25	13.75
MILD	25	18.25	6.75
MODERATE	11	18.25	-7.25
SEVERE	5	18.25	-13.25
Total	73
TEACHING ANXIETY AND PREPAREDNESS
	Counts	N expected	Residue
ABSENT	6	24.3333	-18.3333
MILD	45	24.3333	20.6667
MODERATE	22	24.3333	-2.33333
Total	73
RESILIENCE
	Counts	N expected	Residue
VERY LOW	4	14.6	-10.6
LOW	3	14.6	-11.6
NORMAL	3	14.6	-11.6
HIGH	19	14.6	4.4
VERY HIGH	44	14.6	29.4
Total	73
TOTAL SECTIONS
	Counts	N expected	Residue
ABSENT	16	18.25	-2.25
MILD	42	18.25	23.75
MODERATE	11	18.25	-7.25
SEVERE	4	18.25	-14.25
Total	73
Estadísticos de prueba
	DANGER	XENOPHOBIA	TRAUMATIC STRESS	COMPULSIVE CHECKING	CONTAMINATION	SOCIAL ECONOMICAL	FOBAP	TEACHING ANXIETY AND PREPAREDNESS	RESILIENCE	TOTAL SECTIONS
Chi-cuadrado	20.096a	22.397a	87.274a	42.671a	35.986a	11.444b	25.356a	31.589c	86.658d	45.192a
gl	3	3	3	3	3	3	3	2	4	3
Sig. asintótica	0.00016215	5.39221e-05	8.43283e-19	2.89007e-09	7.53848e-08	0.00955007	1.30069e-05	1.38206e-07	6.74903e-18	8.42382e-10
a.0 cells (0.0%) have an expected count lower than 5. The minimal expected frequency cell count is 18.3.
b.0 cells (0.0%) have an expected count lower than 5. The minimal expected frequency cell count is 18.0.
c.0 cells (0.0%) have an expected count lower than 5. The minimal expected frequency cell count is 24.3.
d.0 cells (0.0%) have an expected count lower than 5. The minimal expected frequency cell count is 14.6.
WORKS MORE THAN 8 HOURS
DANGER
	Counts	N expected	Residue
ABSENT	5	20.25	-15.25
MILD	24	20.25	3.75
MODERATE	34	20.25	13.75
SEVERE	18	20.25	-2.25
Total	81
XENOPHOBIA
	Counts	N expected	Residue
ABSENT	16	20.25	-4.25
MILD	35	20.25	14.75
MODERATE	24	20.25	3.75
SEVERE	6	20.25	-14.25
Total	81
TRAUMATIC STRESS
	Counts	N expected	Residue
ABSENT	50	20.25	29.75
MILD	16	20.25	-4.25
MODERATE	9	20.25	-11.25
SEVERE	6	20.25	-14.25
Total	81
COMPULSIVE CHECKING
	Counts	N expected	Residue
ABSENT	27	20.25	6.75
MILD	34	20.25	13.75
MODERATE	16	20.25	-4.25
SEVERE	4	20.25	-16.25
Total	81
CONTAMINATION
	Counts	N expected	Residue
ABSENT	14	20.25	-6.25
MILD	43	20.25	22.75
MODERATE	19	20.25	-1.25
SEVERE	5	20.25	-15.25
Total	81
SOCIAL ECONOMICAL
	Counts	N expected	Residue
ABSENT	12	19.75	-7.75
MILD	26	19.75	6.25
MODERATE	29	19.75	9.25
SEVERE	12	19.75	-7.75
Total	79
FOBAP
	Counts	N expected	Residue
ABSENT	28	20.25	7.75
MILD	31	20.25	10.75
MODERATE	17	20.25	-3.25
SEVERE	5	20.25	-15.25
Total	81
TEACHING ANXIETY AND PREPAREDNESS
	Counts	N expected	Residue
ABSENT	3	20.25	-17.25
MILD	51	20.25	30.75
MODERATE	26	20.25	5.75
SEVERE	1	20.25	-19.25
Total	81
RESILIENCE
	Counts	N expected	Residue
VERY LOW	3	16.2	-13.2
LOW	1	16.2	-15.2
NORMAL	12	16.2	-4.2
HIGH	25	16.2	8.8
VERY HIGH	40	16.2	23.8
Total	81
TOTAL SECTIONS
	Counts	N expected	Residue
ABSENT	11	20.25	-9.25
MILD	38	20.25	17.75
MODERATE	28	20.25	7.75
SEVERE	4	20.25	-16.25
Total	81
Estadísticos de prueba
	DANGER	XENOPHOBIA	TRAUMATIC STRESS	COMPULSIVE CHECKING	CONTAMINATION	SOCIAL ECONOMICAL	FOBAP	TEACHING ANXIETY AND PREPAREDNESS	RESILIENCE	TOTAL SECTIONS
Chi-cuadrado	21.765a	22.358a	60.877a	25.519a	39.049a	12.392b	20.679a	81.321a	65.852c	35.790a
gl	3	3	3	3	3	3	3	3	4	3
Sig. asintótica	7.29879e-05	5.4946e-05	3.81907e-13	1.20284e-05	1.69435e-08	0.006153	0.000122735	1.5983e-17	1.70209e-13	8.29388e-08
a.0 cells (0.0%) have an expected count lower than 5. The minimal expected frequency cell count is 20.3.
b.0 cells (0.0%) have an expected count lower than 5. The minimal expected frequency cell count is 19.8.
c.0 cells (0.0%) have an expected count lower than 5. The minimal expected frequency cell count is 16.2.
