# Supplementary material for: Teaching Anxiety, Stress and Resilience during the COVID-19 Pandemic: Evaluating the Vulnerability of Academic Professionals in Mexico through the Adapted COVID-19 Stress Scales
Source: Preprints.org preprint supplement (doi:10.20944/preprints202101.0406.v1), 2021-01-20
Supplement: Supplementary file 12 [file Table S9.xlsx]

## Sheet: Supplemental Table 9
Cross Tables
Summary of Cases
	Cases
	Valid		Lost		Total
	N	Percentage	N	Percentage	N	Percentage
RESILIENCE * Teaching anxiety and preparedness	220	1	0	0	220	1
RESILIENCE * DANGER	220	1	0	0	220	1
RESILIENCE * XENOPHOBIA	220	1	0	0	220	1
RESILIENCE * TRAUMATIC STRESS	220	1	0	0	220	1
RESILIENCE * COMPULSIVE CHECKING	220	1	0	0	220	1
RESILIENCE * SOCIAL ECONOMICAL	220	1	0	0	220	1
RESILIENCE * CONTAINATION	217	0.986364	3	0.0136364	220	1
RESILIENCE * Teaching anxiety and preparedness
Cross Tables
			Teaching anxiety and preparedness				Total
			ABSENT	MILD	Teaching Teaching modeRATE	SEVERE
RESILIENCE	Very Low	Counts	2	6	2	0	10
		% of RESILIENCE	0.2	0.6	0.2	0	1
	Low	Counts	0	2	2	0	4
		% of RESILIENCE	0	0.5	0.5	0	1
	Nornal	Counts	1	14	5	1	21
		% of RESILIENCE	0.047619	0.666667	0.238095	0.047619	1
	High	Counts	7	36	24	0	67
		% of RESILIENCE	0.104478	0.537313	0.358209	0	1
	Very High	Counts	4	82	32	0	118
		% of RESILIENCE	0.0338983	0.694915	0.271186	0	1
Total		Counts	14	140	65	1	220
		% of RESILIENCE	0.0636364	0.636364	0.295455	0.00454545	1
Chi-squared tests
	Value	df	Asymptotic significance (bilateral)
Pearson´s Chi-squared	20.207a	12	0.0632693
Verisimilitude	14.6315	12	0.262212
Linear association	0.195067	1	0.658733
# of valid cases	220
a. 12 cells (60.0%) with expected counts lower than 5. The expected minimal count is .02.
Symmetric measures
		Value	Asymptotic standard error a	Approx. Tb	Approx. significance
Interval	Pearson´s R	0.0298449	0.0727558	0.440851	.660c
Ordinal	Spearman´s Correlation	-0.00355898	0.0684908	-0.052548	.958c
# of valid cases		220
a. The null hypothesis is not assumed.
b. Use of the asymptotic standard error that assumes the null hypothesis.
c. Is based on the normal approximation
RESILIENCE * DANGER
Cross Tables
			DANGER				Total
			ABSENT	MILD	Teaching Teaching modeRATE	SEVERE
RESILIENCE	Very Low	Counts	6	1	2	1	10
		% of RESILIENCE	0.6	0.1	0.2	0.1	1
	Low	Counts	0	1	0	3	4
		% of RESILIENCE	0	0.25	0	0.75	1
	Nornal	Counts	2	5	11	3	21
		% of RESILIENCE	0.0952381	0.238095	0.52381	0.142857	1
	High	Counts	3	25	25	14	67
		% of RESILIENCE	0.0447761	0.373134	0.373134	0.208955	1
	Very High	Counts	10	38	55	15	118
		% of RESILIENCE	0.0847458	0.322034	0.466102	0.127119	1
Total		Counts	21	70	93	36	220
		% of RESILIENCE	0.0954545	0.318182	0.422727	0.163636	1
Chi-squared tests
	Value	df	Asymptotic significance (bilateral)
Pearson´s Chi-squared	46.411a	12	5.89281e-06
Verisimilitude	31.1446	12	0.00187243
Linear association	1.38076	1	0.239971
# of valid cases	220
a. 10 cells (50.0%) with expected counts lower than 5. The expected minimal count is .38.
Symmetric measures
		Value	Asymptotic standard error a	Approx. Tb	Approx. significance
Interval	Pearson´s R	0.0794031	0.0865318	1.17609	.241c
Ordinal	Spearman´s Correlation	0.000465815	0.0726311	0.00687768	.995c
# of valid cases		220
a. The null hypothesis is not assumed.
b. Use of the asymptotic standard error that assumes the null hypothesis.
c. Is based on the normal approximation
RESILIENCE * XENOPHOBIA
Cross Tables
			XENOPHOBIA				Total
			ABSENT	MILD	Teaching Teaching modeRATE	SEVERE
RESILIENCE	Very Low	Counts	7	2	1	0	10
		% of RESILIENCE	0.7	0.2	0.1	0	1
	Low	Counts	1	1	0	2	4
		% of RESILIENCE	0.25	0.25	0	0.5	1
	Nornal	Counts	3	8	9	1	21
		% of RESILIENCE	0.142857	0.380952	0.428571	0.047619	1
	High	Counts	9	32	21	5	67
		% of RESILIENCE	0.134328	0.477612	0.313433	0.0746269	1
	Very High	Counts	27	49	35	7	118
		% of RESILIENCE	0.228814	0.415254	0.29661	0.059322	1
Total		Counts	47	92	66	15	220
		% of RESILIENCE	0.213636	0.418182	0.3	0.0681818	1
Chi-squared tests
	Value	df	Asymptotic significance (bilateral)
Pearson´s Chi-squared	31.400a	12	0.00171147
Verisimilitude	23.6877	12	0.0224237
Linear association	0.97487	1	0.323469
# of valid cases	220
a. 11 cells (55.0%) with expected counts lower than 5. The expected minimal count is .27.
Symmetric measures
		Value	Asymptotic standard error a	Approx. Tb	Approx. significance
Interval	Pearson´s R	0.0667193	0.0765043	0.987298	.325c
Ordinal	Spearman´s Correlation	-0.00887982	0.0712258	-0.131114	.896c
# of valid cases		220
a. The null hypothesis is not assumed.
b. Use of the asymptotic standard error that assumes the null hypothesis.
c. Is based on the normal approximation
RESILIENCE * TRAUMATIC STRESS
Cross Tables
			TRAUMATIC STRESS				Total
			ABSENT	MILD	Teaching Teaching modeRATE	SEVERE
RESILIENCE	Very Low	Counts	9	0	1	0	10
		% of RESILIENCE	0.9	0	0.1	0	1
	Low	Counts	1	1	2	0	4
		% of RESILIENCE	0.25	0.25	0.5	0	1
	Nornal	Counts	9	8	3	1	21
		% of RESILIENCE	0.428571	0.380952	0.142857	0.047619	1
	High	Counts	37	18	7	5	67
		% of RESILIENCE	0.552239	0.268657	0.104478	0.0746269	1
	Very High	Counts	88	22	5	3	118
		% of RESILIENCE	0.745763	0.186441	0.0423729	0.0254237	1
Total		Counts	144	49	18	9	220
		% of RESILIENCE	0.654545	0.222727	0.0818182	0.0409091	1
Chi-squared tests
	Value	df	Asymptotic significance (bilateral)
Pearson´s Chi-squared	27.424a	12	0.00671146
Verisimilitude	25.6027	12	0.0122112
Linear association	3.20066	1	0.0736088
# of valid cases	220
a. 12 cells (60.0%) with expected counts lower than 5. The expected minimal count is .16.
Symmetric measures
		Value	Asymptotic standard error a	Approx. Tb	Approx. significance
Interval	Pearson´s R	-0.120892	0.0655014	-1.79814	.074c
Ordinal	Spearman´s Correlation	-0.202275	0.0662014	-3.0496	.003c
# of valid cases		220
a. The null hypothesis is not assumed.
b. Use of the asymptotic standard error that assumes the null hypothesis.
c. Is based on the normal approximation
RESILIENCE * COMPULSIVE CHECKING
Cross Tables
			COMPULSIVE CHECKING				Total
			ABSENT	MILD	Teaching Teaching modeRATE	SEVERE
RESILIENCE	Very Low	Counts	9	1	0	0	10
		% of RESILIENCE	0.9	0.1	0	0	1
	Low	Counts	1	2	0	1	4
		% of RESILIENCE	0.25	0.5	0	0.25	1
	Nornal	Counts	4	10	7	0	21
		% of RESILIENCE	0.190476	0.47619	0.333333	0	1
	High	Counts	27	25	11	4	67
		% of RESILIENCE	0.402985	0.373134	0.164179	0.0597015	1
	Very High	Counts	54	44	14	6	118
		% of RESILIENCE	0.457627	0.372881	0.118644	0.0508475	1
Total		Counts	95	82	32	11	220
		% of RESILIENCE	0.431818	0.372727	0.145455	0.05	1
Chi-squared tests
	Value	df	Asymptotic significance (bilateral)
Pearson´s Chi-squared	24.053a	12	0.020003
Verisimilitude	25.0585	12	0.014548
Linear association	0.145975	1	0.702412
# of valid cases	220
a. 11 cells (55.0%) with expected counts lower than 5. The expected minimal count is .20.
Symmetric measures
		Value	Asymptotic standard error a	Approx. Tb	Approx. significance
Interval	Pearson´s R	0.0258177	0.0649805	0.381321	.703c
Ordinal	Spearman´s Correlation	-0.0511507	0.0676259	-0.75622	.450c
# of valid cases		220
a. The null hypothesis is not assumed.
b. Use of the asymptotic standard error that assumes the null hypothesis.
c. Is based on the normal approximation
RESILIENCE * SOCIAL ECONOMICAL
Cross Tables
			SOCIAL ECONOMICAL				Total
			ABSENT	MILD	Teaching Teaching modeRATE	SEVERE
RESILIENCE	Very Low	Counts	6	1	2	1	10
		% of RESILIENCE	0.6	0.1	0.2	0.1	1
	Low	Counts	1	0	2	1	4
		% of RESILIENCE	0.25	0	0.5	0.25	1
	Nornal	Counts	4	10	6	1	21
		% of RESILIENCE	0.190476	0.47619	0.285714	0.047619	1
	High	Counts	7	36	20	4	67
		% of RESILIENCE	0.104478	0.537313	0.298507	0.0597015	1
	Very High	Counts	28	58	29	3	118
		% of RESILIENCE	0.237288	0.491525	0.245763	0.0254237	1
Total		Counts	46	105	59	10	220
		% of RESILIENCE	0.209091	0.477273	0.268182	0.0454545	1
Chi-squared tests
	Value	df	Asymptotic significance (bilateral)
Pearson´s Chi-squared	23.907a	12	0.0209383
Verisimilitude	23.4808	12	0.0239104
Linear association	0.233508	1	0.628935
# of valid cases	220
a. 11 cells (55.0%) with expected counts lower than 5. The expected minimal count is .18.
Symmetric measures
		Value	Asymptotic standard error a	Approx. Tb	Approx. significance
Interval	Pearson´s R	-0.0326534	0.0849849	-0.482379	.630c
Ordinal	Spearman´s Correlation	-0.0837353	0.0726286	-1.24069	.216c
# of valid cases		220
a. The null hypothesis is not assumed.
b. Use of the asymptotic standard error that assumes the null hypothesis.
c. Is based on the normal approximation
RESILIENCE * CONTAINATION
Cross Tables
			CONTAINATION				Total
			ABSENT	MILD	Teaching Teaching modeRATE	SEVERE
RESILIENCE	Very Low	Counts	7	0	1	2	10
		% of RESILIENCE	0.7	0	0.1	0.2	1
	Low	Counts	0	1	1	1	3
		% of RESILIENCE	0	0.333333	0.333333	0.333333	1
	Nornal	Counts	4	6	10	1	21
		% of RESILIENCE	0.190476	0.285714	0.47619	0.047619	1
	High	Counts	8	21	24	13	66
		% of RESILIENCE	0.121212	0.318182	0.363636	0.19697	1
	Very High	Counts	19	46	36	16	117
		% of RESILIENCE	0.162393	0.393162	0.307692	0.136752	1
Total		Counts	38	74	72	33	217
		% of RESILIENCE	0.175115	0.341014	0.331797	0.152074	1
Chi-squared tests
	Value	df	Asymptotic significance (bilateral)
Pearson´s Chi-squared	28.829a	12	0.0041765
Verisimilitude	26.8061	12	0.00823938
Linear association	0.879541	1	0.348327
# of valid cases	217
a. 10 cells (50.0%) with expected counts lower than 5. The expected minimal count is .46.
Symmetric measures
		Value	Asymptotic standard error a	Approx. Tb	Approx. significance
Interval	Pearson´s R	0.0638118	0.0823109	0.937576	.350c
Ordinal	Spearman´s Correlation	-0.0124059	0.0720716	-0.18192	.856c
# of valid cases		217
a. The null hypothesis is not assumed.
b. Use of the asymptotic standard error that assumes the null hypothesis.
c. Is based on the normal approximation
RESILIENCE * FOBAP
			RMSPA				Total
			ABSENT	MILD	Teaching Teaching modeRATE	SEVERE
RESILIENCE	Very Low	Recuento	6	3	1	0	10
		% dentro de RR	0.6	0.3	0.1	0	1
	Low	Recuento	1	1	1	1	4
		% dentro de RR	0.25	0.25	0.25	0.25	1
	Nornal	Recuento	5	9	7	0	21
		% dentro de RR	0.238	0.429	0.333	0	1
	High	Recuento	22	24	14	7	67
		% dentro de RR	0.328	0.358	0.209	0.104	1
	Very High	Recuento	56	39	17	6	118
		% dentro de RR	0.475	0.331	0.144	0.051	1
Total		Recuento	90	76	40	14	220
		% dentro de RR	0.409	0.345	0.182	0.064	1
Pruebas de chi-cuadrado
	Valor	df	Significación asintótica (bilateral)
Chi-cuadrado de Pearson	16.170a	12	0.184
Razón de verosimilitud	16.729	12	0.16
Asociación lineal por lineal	0.761	1	0.383
N de casos válidos	220
a. 11 casillas (55.0%) han esperado un recuento menor que 5. El recuento mínimo esperado es .25.
Medidas simétricas
		Valor	Error estándar asintóticoa	T aproximadab	Significación aproximada
Intervalo por intervalo	R de Pearson	-0.059	0.065	-0.872	.384c
Ordinal por ordinal	Correlación de Spearman	-0.136	0.066	-2.022	.044c
N de casos válidos		220
a. No se presupone la hipótesis nula.
b. Utilización del error estándar asintótico que presupone la hipótesis nula.
c. Se basa en aproximación normal.
